# Supplementary material for: The impact of clinical genome sequencing in a global population of patients with suspected rare genetic disease
Source: Research Square preprint supplement (doi:10.21203/rs.3.rs-3117254/v1), 2023-08-04
Supplement: Supplementary file 1 [file ae0faac7b1033eb4da7c9b8b.xlsx]

## Sheet: Test_Outcomes
anonymizedID	HIC/LMIC	Sex	Report Category	Indication	Variant Category	Variant Type	Gene Symbol	Chromosom	Start	End	cDNA/ Copy Number	AA Change/ Cytogenetic Band	Zygosity	Consequence/CNV size	Inherited From/Chromosome of Origin	Condition	Inheritance Mode (of associated condition)	Variant Pathogenicity	Additional Information
00037	HIC	Male	POSITIVE	suspected pseudo hypoaldosteronism, bilateral cleft palate, coloboma, bilateral preauricular pits, prominent forehead, upslanting palpebral fissures, long fingers and toes, large anterior fontanelle, diarrhea, concern for intestinal malabsorption.	Full or partial overlap with indication for testing	insertion	SPINT2	19	38774325	38774325	c.166_167dupTA	Asn57ThrfsTer24	Heterozygous	frameshift_variant	paternal	Syndromic Congenital Diarrhea	RECESSIVE	Pathogenic
00037	HIC	Male	POSITIVE	suspected pseudo hypoaldosteronism, bilateral cleft palate, coloboma, bilateral preauricular pits, prominent forehead, upslanting palpebral fissures, long fingers and toes, large anterior fontanelle, diarrhea, concern for intestinal malabsorption.	Full or partial overlap with indication for testing	SNV	SPINT2	19	38780855	38780855	c.488A>G	Tyr163Cys	Heterozygous	missense_variant	maternal	Syndromic Congenital Diarrhea	RECESSIVE	Pathogenic
00040	HIC	Female	POSITIVE	renal failure with segmental glomerulosclerosis, congestive heart failure as well as a core myopathy phenotype seen on skeletal muscle biopsy	Full or partial overlap with indication for testing	SNV	NUP93	16	56868350	56868350	c.1733G>C	Arg578Pro	Heterozygous	missense_variant	maternal	Nephrotic Syndrome	RECESSIVE	Likely Pathogenic
00040	HIC	Female	POSITIVE	renal failure with segmental glomerulosclerosis, congestive heart failure as well as a core myopathy phenotype seen on skeletal muscle biopsy	Full or partial overlap with indication for testing	deletion	NUP93	16	56870608	56870626	c.1882_1899delCTGTATGACCTTGCCAAG	Leu628_Lys633del	Heterozygous	inframe_deletion	paternal	Nephrotic Syndrome	RECESSIVE	Likely Pathogenic
00041	HIC	Female	See Below (Inconclusive)	chronic cough, recurrent pneumonia, pulmonary infections as well as joint hypermobility.	Full or partial overlap with indication for testing	SNV	DNAH11	7	21882243	21882243	c.10773C>G	His3591Gln	Heterozygous	missense_variant	maternal	Primary Ciliary Dyskinesia	RECESSIVE	Variant of Uncertain Significance
00042	HIC	Male	NEGATIVE	fistulizing Crohn's disease, mild dysmorphic features, and inflammatory bowel disease.
00056	LMIC	Male	POSITIVE	hypotonia, upslanting palpebral fissures, epicanthal folds, bilateral single transverse palmar creases, a cardiac defect, strabismus, and a wide space between toes one and two. Consistent with these features, the patient has a clinical diagnosis of Trisomy 21, which was previously confirmed via karyotype analysis. Additionally, phenotypic features that are not consistent with a diagnosis of Triso…	Full or partial overlap with indication for testing	SNV	ACTA1	1	229567637	229567637	c.821C>T	Ala274Val	Heterozygous	missense_variant	maternal	Nemaline Myopathy	DOMINANT	Likely Pathogenic
00056	LMIC	Male	POSITIVE	hypotonia, upslanting palpebral fissures, epicanthal folds, bilateral single transverse palmar creases, a cardiac defect, strabismus, and a wide space between toes one and two. Consistent with these features, the patient has a clinical diagnosis of Trisomy 21, which was previously confirmed via karyotype analysis. Additionally, phenotypic features that are not consistent with a diagnosis of Triso…	Full or partial overlap with indication for testing	copy_number_variation		21			3			aneuploidy	unknown, presumed spontaneous	Trisomy 21 (Down syndrome)	unknown, presumed spontaneous	Pathogenic
00053	LMIC	Female	POSITIVE	multiple congenital anomalies, including ocular colobomas, low set posteriorly rotated ears, hypomelanosis of Ito, developmental delay, solitary kidney, as well as atrial and ventricular septal defects.	Full or partial overlap with indication for testing	copy_number_variation		14			3		Heterozygous	aneuploidy	unknown, presumed spontaneous	Mosaic Trisomy 14	DOMINANT	Pathogenic
00055	LMIC	Male	POSITIVE	severe microcephaly and growth restriction, developmental delay, cortical blindness, constant movement, G-tube feeding, and dysmorphic features.	Full or partial overlap with indication for testing	SNV	TSEN54	17	73518081	73518081	c.919G>T	Ala307Ser	Homozygous	missense_variant	maternal, unknown	Pontocerebellar Hypoplasia	RECESSIVE	Pathogenic
00059	LMIC	Male	POSITIVE	arthrogryposis of the hands, hips, knees, and feet; camptodactyly; kyphosis; bilateral cryptorchidism; exotropia; micrognathia; short neck; dysmorphic features; congenital esophageal stenosis; reflux; and hypoplasia of the corpus callosum.	Full or partial overlap with indication for testing	deletion	ECEL1	2	233351208	233351254	c.110_155delTCCCGTTGGGCGCTGCGCGCAGCGCCACCGGGGCCCGGTCCGGGCT	Phe37CysfsTer151	Heterozygous	frameshift_variant	maternal	Distal Arthrogryposis Type 5D	RECESSIVE	Pathogenic
00059	LMIC	Male	POSITIVE	arthrogryposis of the hands, hips, knees, and feet; camptodactyly; kyphosis; bilateral cryptorchidism; exotropia; micrognathia; short neck; dysmorphic features; congenital esophageal stenosis; reflux; and hypoplasia of the corpus callosum.	Full or partial overlap with indication for testing	SNV	ECEL1	2	233349971	233349971	c.793C>T	Gln265Ter	Heterozygous	stop_gained	paternal	Distal Arthrogryposis Type 5D	RECESSIVE	Likely Pathogenic
00057	LMIC	Female	POSITIVE	global developmental delay with language delay, strabismus, coxa vulga, genu valgum, pes planus, low-set, cupped ears with attached lobe, broad palate with alveolar ridge, short neck, inverted nipples, truncal obesity, broad-based ataxic gait, hypotonia, and lumbar lordosis. The patient is also noted to have a round face and wears glasses.	Full or partial overlap with indication for testing	uniparental disomy		15	seq(HG19) (15)x1 hmz pat						paternal	Angelman syndrome	unknown, presumed spontaneous		Copy number variant analysis for this patient identified results consistent with uniparental disomy of paternal chromosome 15. Paternal uniparental disomy of chromosome 15 is a well-established cause of Angelman syndrome (Dagli et al. 2015). While results from this clinical whole genome sequencing family study are consistent with paternal uniparental disomy of chromosome 15 in the patient, the st…
00065	HIC	Female	NEGATIVE	family history includes a mother with Ehlers-Danlos syndrome, hypermobility type. The patient's reported phenotype includes a question of Ehlers-Danlos syndrome based on the family history and parent report. In addition there were reports of multiple upper respiratory tract infections and gerd in the patient.
00054	LMIC	Female	NEGATIVE	non-specific white matter findings on MRI, absence of speech, delayed walking at two years of age, hearing loss, disturbed sleep as well as facial dysmorphisms including downslanted palpebral fissures, medial eyebrow flare and mild synophrys. She is undergoing ABA therapy for autism
00058	LMIC	Male	NEGATIVE	rigidity, spasticity, global developmental delay, severe intellectual disability, severe sleep disturbance treated with carbamazepine, hypoplasia of the temporal lobes noted on CT and MRI, a vascular malformation note on MRI, axial hypotonia, appendicular hypertonia, short palpebral fissures, and an ear tag. “striking” abnormal movements which are described as generalized dystonia, myoclonus, and…
00045	HIC	Female	NEGATIVE	joint hypermobility and dislocation, hypotonia, chronic pain and fatigue, motor delay, decreased stamina, failure to thrive, laryngomalacia, constipation, gastrointestinal difficulties, sleep disturbances, upper lip tie (oral frenulum), labial adhesions, microcephaly, bitemporal narrowing, mild malar hypoplasia, high arched narrow palate, and dental crowding.
00043	HIC	Male	POSITIVE	a clinical diagnosis of a connective disorder and hypermobile joints of unknown etiology. Additionally, a history of speech delay, speech apraxia, autism, dysmorphic facial features, recent weight loss, short stature, and an abnormal response to traumatic pain.	Full or partial overlap with indication for testing	copy_number_variation		16	28823315	29047087	3	16p11.2	Heterozygous	223 Kb	maternal	16p11.2 duplication	DOMINANT	Pathogenic
00044	HIC	Female	POSITIVE	chronic pain, constipation, extremely loose joints (but not meeting criteria for a clinical diagnosis of a connective tissue disorder), hip dysplasia, eczema, ichthyosis vulgaris, and attention deficit hyperactivity disorder (ADHD).	Full or partial overlap with indication for testing	SNV	FLG	1	152285861	152285861	c.1501C>T	Arg501Ter	Homozygous	stop_gained	both	FLG-Related Disorders	DOMINANT	Pathogenic
00048	LMIC	Male	POSITIVE	macrocephaly with hydrocephalus ex vacuo on brain imaging, mild hepatosplenomegaly, bilateral cryptorchidism and developmental delay. He was reported to have been sick frequently with respiratory infections and has slight upslanting palpebral fissures and mild synophrys.	Full or partial overlap with indication for testing	SNV	USP7	16	9009156	9009156	c.1033G>A	Glu345Lys	Heterozygous	missense_variant	de novo	USP7-Related Neurodevelopmental Disorder	DOMINANT	Likely Pathogenic
00051	LMIC	Male	See Below (Inconclusive)	arthrogryposis with clenched hands, club foot, posterior plagiocephaly, atrial septal defect, poor head control, severe failure to thrive and developmental delay. Other features include a notable metopic ridge, large anterior fontanel, lacrimal duct abnormalities, epicanthal folds, short palpebral fissures, small cupped ears with crimped upper helix and downslanting crux, small mouth with downtur…	Full or partial overlap with indication for testing	SNV	TTN	2	179413597	179413597	c.92756G>A	Arg30919Gln	Heterozygous	missense_variant	maternal	TTN-Related Disorders, including Salih Myopathy	RECESSIVE	Variant of Uncertain Significance
00051	LMIC	Male	See Below (Inconclusive)	arthrogryposis with clenched hands, club foot, posterior plagiocephaly, atrial septal defect, poor head control, severe failure to thrive and developmental delay. Other features include a notable metopic ridge, large anterior fontanel, lacrimal duct abnormalities, epicanthal folds, short palpebral fissures, small cupped ears with crimped upper helix and downslanting crux, small mouth with downtur…	Full or partial overlap with indication for testing	SNV	TTN	2	179659244	179659244	c.1280C>T	Ala427Val	Heterozygous	missense_variant	paternal	TTN-Related Disorders, including Salih Myopathy	RECESSIVE	Variant of Uncertain Significance
00066	HIC	Female	POSITIVE	severe intellectual disability, a neurologic disorder of unknown etiology, concern for brain iron accumulation based on MRI, history of delayed myelination although myelination is now complete, mildly dysmorphic facial features, hypotonic facial expressions, concern for optic atrophy with pale optic nerves, decreased tone in the upper extremities with increased tone in the lower extremities, and …	Full or partial overlap with indication for testing	SNV	WDR45	X	48933202	48933202	c.728+2T>A		Heterozygous	splice_donor_variant	de novo	Neurodegeneration with Brain Iron Accumulation	X_LINKED	Pathogenic
00050	LMIC	Female	POSITIVE	microcephaly and severe intellectual disability, with no speech and behavioral problems including repetitive, aggressive, and self-abusive behavior. She is also described as having sleep difficulties, ataxic walking, and dysmorphic facial features including downslanting palpebral fissures, full lips, frontal upsweep, ptosis, strabismus, and dental crowding.	Full or partial overlap with indication for testing	copy_number_variation		2	11314	3033976	1	2p25.3	Heterozygous	3.02 Mb	de novo	2p25.3 deletion	DOMINANT	Pathogenic
00050	LMIC	Female	POSITIVE	microcephaly and severe intellectual disability, with no speech and behavioral problems including repetitive, aggressive, and self-abusive behavior. She is also described as having sleep difficulties, ataxic walking, and dysmorphic facial features including downslanting palpebral fissures, full lips, frontal upsweep, ptosis, strabismus, and dental crowding.	Full or partial overlap with indication for testing	copy_number_variation		16	82865402	90163542	3	16q23.3-24.3	Heterozygous	7.30 Mb	de novo	16q23.3-24.3 duplication	DOMINANT	Pathogenic
00063	LMIC	Male	See Below (Inconclusive)	a suspected diagnosis of Floating-Harbor syndrome, intellectual disability, and a history of a seizure at four years of age. The patient's reported dysmorphology exam includes repaired ptosis, depression in the line of the metopic suture, low posterior and frontal hairlines, feathered eyebrows, cupped, protuberant ears, small left ear canal, low hanging columella, depressed nasal tip, short fourt…	Full or partial overlap with indication for testing	SNV	EP300	22	41547895	41547895	c.2876G>T	Ser959Ile	Heterozygous	missense_variant	unknown (not detected in mother)	Rubinstein-Taybi Syndrome	DOMINANT	Variant of Uncertain Significance
00046	LMIC	Male	POSITIVE	differential diagnoses of blepharophimosis, ptosis, and epicanthus inversus syndrome (BPES), Ohdo syndrome, or a microdeletion syndrome. He is described as having dysmorphic features and congenital anomalies, with specific mention of scaphocephaly, prominent metopic ridge, hypoplastic supraorbital ridge, high arched eyebrows, epicanthus inversus, short upslanting palpebral fissures, ptosis, bleph…	Full or partial overlap with indication for testing	copy_number_variation		2	236478472	243048854	1	2q36.1-q37.3	Heterozygous	6.6 Mb	de novo	2q37 microdeletion syndrome	DOMINANT	Pathogenic
00046	LMIC	Male	POSITIVE	differential diagnoses of blepharophimosis, ptosis, and epicanthus inversus syndrome (BPES), Ohdo syndrome, or a microdeletion syndrome. He is described as having dysmorphic features and congenital anomalies, with specific mention of scaphocephaly, prominent metopic ridge, hypoplastic supraorbital ridge, high arched eyebrows, epicanthus inversus, short upslanting palpebral fissures, ptosis, bleph…	Full or partial overlap with indication for testing	copy_number_variation		3	195106447	197846145	3	3q29	Heterozygous	2.7 Mb	de novo	3q29 duplication	DOMINANT	Pathogenic
00038	HIC	Female	See Below (Inconclusive)	neonatal hypotonia, abnormal sulcation in frontal lobes, microcephaly, elevated creatine kinase (CK), myopathy, muscular dystrophy and muscle weakness, joint contractures, hepatomegaly, feeding difficulty, failure to thrive, and respiratory failure.	Full or partial overlap with indication for testing	SNV	POMK	8	42958734	42958734	c.43C>T	Arg15Ter	Heterozygous	stop_gained	maternal	Walker-Warburg Syndrome	RECESSIVE	Pathogenic
00062	LMIC	Male	NEGATIVE	white matter abnormalities and cortical atrophy, which were detected using MRI, however there has been no progression. This patient also has truncal hypotonia, spasticity, bilateral ptosis, myopathic facies, and a single palmar crease. In addition, he experiences sleep disturbance and has very limited communication ability, whereby his vocabulary consists of only a few words.
00047	LMIC	Female	NEGATIVE	pre- and post-natal growth deficiency, striking developmental delay with no seizures and no regression, hearing loss, a patent ductus arteriosus, microcytosis with low iron levels but no anemia, and significant obstructive sleep apnea. She has a history of resolved pyelectasis. A physical exam details dysmorphic features and malformations, including mild dolichocephaly with a tall forehead, bilat…
00049	LMIC	Female	See Below (Inconclusive)	congenital inflammatory myopathy, hypotonia, muscle pain, absent reflexes, and motor delay. A muscle biopsy showed necrosis and paleness of sarcoplasm with eosinophilia, multiple vacuoles and inflammatory infiltrate.	Incidental Finding	copy_number_variation		16	14800000	16400000	3	16p13.11	Heterozygous	1.6 Mb	unknown (not detected in mother)	16p13.11 Microduplication Syndrome	DOMINANT	Pathogenic
00064	LMIC	Male	NEGATIVE	poor weight gain with microcephaly, poor head control, inability to sit or turn, peripheral increased tone, and central decreased tone. Dysmorphic features include micrognathia, plagiocephaly, upslanting palpebral fissures hypoplastic nasal ridges and supraorbital ridges, and ear malformations including protuberant ears and preauricular pits. He also has additional traits including two café-au la…
00067	HIC	Male	NEGATIVE	development of thrombocytopenia in the setting of parvovirus B19 infection with continued symptoms of bruising with occasional petachiae, fatigue and arthralgia. A DEXA scan indicated osteopenia. scrotal swelling and scrotal hematomas, and most significantly, the occurrence of a rare vascular anomaly, kapisofirm lympahgiomatosis.
00082	HIC	Male	POSITIVE	chronic diarrhea, failure to thrive, metabolic acidosis, carbohydrate malabsorption, and elevated creatinine and calprotectin. In addition, his stools have a low pH and reduced elastase and it was noted that he had been admitted to the PICU for a short period for hypovolemia and renal failure with hyperkalemia. He also has mild dysmorphic features including upslanting palpebral fissures and inver…	Full or partial overlap with indication for testing	SNV	AP1S1	7	100800661	100800661	c.186T>G	Tyr62Ter	Homozygous	stop_gained	both	MEDNIK (mental retardation enteropathy deafness peripheral neuropathy ichthyosis and keratodermia) syndrome	RECESSIVE	Likely Pathogenic
00052	LMIC	Male	POSITIVE	severe global developmental delay, microcephaly, seizures, truncal hypotonia, choreoathetoid movements, and hand-wringing behaviors. He is also described as having dysmorphic features including a hair whorl, low anterior hairline, epicanthal folds, synophrys, prominent supraorbital ridges, large ears, prominent nasal tip, thin upper lip, bi-temporal narrowing, widely spaced teeth, a fused broad s…	Full or partial overlap with indication for testing	deletion	FOXG1	14	29236985	29236986	c.506delG	Gly169AlafsTer23	Heterozygous	frameshift_variant	de novo	FOXG1 Syndrome	DOMINANT	Pathogenic
00073	HIC	Male	NEGATIVE	developmental delay, including cognitive and language delays, excessive fatigue and daytime sleepiness, central tremors, seizure disorder, migraines with aura, abnormal involuntary movement, anxiety, ADHD, obstructive sleep apnea, chronic sinusitis and otitis media, a history of nasal polyps, cholesteatoma, colonic dysmotility, constipation, biliary dyskinesia, gastroesophageal reflux, intestinal…
00039	HIC	Female	NEGATIVE	an initial presentation of tooth pain, followed by a fever, intractable seizures and status eplilepticus of unclear etiology refractory to anti-epileptic drugs, and lactic acidosis. Work-ups for infectious and immunological etiologies were negative. Lumbar punctures were unrevealing. Brain MRI and biopsy showed no gross abnormality, no neoplasm, vasculitis, inflammatory process, demyelinating dis…
00083	HIC	Female	NEGATIVE	severe developmental delay, short stature, seizures, cortical atrophy and blindness, failure to thrive, and recent episodes of apnea. Previous medical work-up has revealed diffuse white matter abnormalities with marked supratentorial brain volume loss via MRI and findings consistent with global cerebral dysfunction and generalized epilepsy syndrome via EEG. She has increased tone in her extremiti…
00069	HIC	Female	POSITIVE	seizures which are controlled through Dilantin monotherapy, infantileonset status epilepticus, intellectual disability, persistent microcephaly, and global developmental delay including lack of speech, decreased mobility, and decreased fine motor skills. She also has congenital hypotonia, kyphosis, syrignomyelia, torticollis, foot dorsiflexion and pes plenovalgus, the need for bilateral ankle foo…	Full or partial overlap with indication for testing	SNV	AGMO	7	15584417	15584417	c.389G>A	Trp130Ter	Heterozygous	stop_gained	maternal	Disease Association NOS	RECESSIVE	Variant of Uncertain Significance
00069	HIC	Female	POSITIVE	seizures which are controlled through Dilantin monotherapy, infantileonset status epilepticus, intellectual disability, persistent microcephaly, and global developmental delay including lack of speech, decreased mobility, and decreased fine motor skills. She also has congenital hypotonia, kyphosis, syrignomyelia, torticollis, foot dorsiflexion and pes plenovalgus, the need for bilateral ankle foo…	Full or partial overlap with indication for testing	SNV	AGMO	7	15430495	15430495	c.712G>T	Gly238Cys	Heterozygous	missense_variant	paternal	Disease Association NOS	RECESSIVE	Variant of Uncertain Significance
00069	HIC	Female	POSITIVE	seizures which are controlled through Dilantin monotherapy, infantileonset status epilepticus, intellectual disability, persistent microcephaly, and global developmental delay including lack of speech, decreased mobility, and decreased fine motor skills. She also has congenital hypotonia, kyphosis, syrignomyelia, torticollis, foot dorsiflexion and pes plenovalgus, the need for bilateral ankle foo…	Full or partial overlap with indication for testing	SNV	SCN3A	2	165969480	165969480	c.3758T>C	Leu1253Pro	Heterozygous	missense_variant	de novo	Epilepsy	DOMINANT	Variant of Uncertain Significance
00069	HIC	Female	POSITIVE	seizures which are controlled through Dilantin monotherapy, infantileonset status epilepticus, intellectual disability, persistent microcephaly, and global developmental delay including lack of speech, decreased mobility, and decreased fine motor skills. She also has congenital hypotonia, kyphosis, syrignomyelia, torticollis, foot dorsiflexion and pes plenovalgus, the need for bilateral ankle foo…	Full or partial overlap with indication for testing	SNV	COL6A3	2	238285682	238285682	c.2803C>T	Arg935Trp	Heterozygous	missense_variant	de novo	Collagen Type VI-Related Disorders	DOMINANT	Likely Pathogenic
00070	HIC	Female	NEGATIVE	global developmental delay, bitemporal corneal clouding, symmetric growth restriction, microcephaly, hypertonia, failure to thrive, and seizures. She is described as having possible hyperreflexia and spasticity. Abnormal persistent T1 hyperintesity in the thalmi and lentiform nuceli with an increase in ventricular size and a decrease in periventricular white matter volume over time were observed …
00078	HIC	Female	NEGATIVE	arthrogryposis as well as skeletal dysplasia. Her left arm remains in the ‘waiter’s tip’ position with an extension contracture at the elbow. She has bilateral talipes, hip dysplasia, low bone density and mild scoliosis. She was also reported to have left eye ptosis and marked hypotonia.
00075	HIC	Male	POSITIVE	progressive dystonia with initial onset at approximately three years of age in his left leg. The dystonia gradually progressed to a generalized dystonia affecting the lower and upper extremities and cervical dystonia. Other reported history and features include prematurity (born at 28 weeks), dysarthria/anarthria, tongue dyskinesia, microcephaly, abnormal ocular movements, intellectual disability…	Full or partial overlap with indication for testing	copy_number_variation		19	35223021	36895699	1	19q13.11	Heterozygous	1.67 Mb	de novo	19q13.11 microdeletion syndrome and dystonia type 28, childhood-onset	DOMINANT	Pathogenic
00074	HIC	Female	NEGATIVE	a complex array of symptoms that started in 2012 after Epstein-Barr virus and CMV infection. Her clinical phenotype includes chronic pain and fatigue, abdominal pain, weight loss, neuropathy, polyuria, excessive sweating and thirst, heat and cold intolerance, hypokalemia and hypoglycemia, syncope, bradycardia, nausea, and headaches.
00061	LMIC	Female	POSITIVE	severe prenatal onset microcephaly and MRI has shown lissencephaly, agenesis of the corpus callosum, and small cerebellum (Dandy-Walker malformation noted). She has severe postnatal growth retardation, global developmental delay, an atrial septal defect, hearing loss, and dysmorphic features including striking metopic ridge, broad mid-portion of the nose, narrow palate with broad secondary alveol…	Full or partial overlap with indication for testing	SNV	TUBA1A	12	49579053	49579053	c.1096G>C	Gly366Arg	Heterozygous	missense_variant	de novo	Lissencephaly Dominant	DOMINANT	Pathogenic
00085	LMIC	Male	NEGATIVE	severe microcephaly, global developmental delay, seizures, and optic nerve hypoplasia. Fetal and postnatal imaging indicated multiple central nervous system abnormalities including severely dysplastic brain hemispheres, holoprosencephaly, abnormal sulcation, encephalomalacia, porencephaly, schizencephaly, absent septum pellucidum, lack of calvarium, hydrocephalus, and ventriculomegaly which are c…
00090	LMIC	Male	POSITIVE	growth deficiency, microcephaly, intellectual disability with no speech, hyperactivity, large bulbous nose, epicanthal folds, short philtrum, small mandible. He also had seizures from 3 months to 3 years of age. Family history is pertinent for two maternal uncles who have little or no speech.	Full or partial overlap with indication for testing	copy_number_variation		6	109324789	124836619	1	6q21-6q22.1	Heterozygous	15.5 Mb	unknown (not detected in mother)	6q21-6q22.1 Deletion Syndrome (AcroCardio-Facial Syndrome)	DOMINANT	Pathogenic
00090	LMIC	Male	POSITIVE	growth deficiency, microcephaly, intellectual disability with no speech, hyperactivity, large bulbous nose, epicanthal folds, short philtrum, small mandible. He also had seizures from 3 months to 3 years of age. Family history is pertinent for two maternal uncles who have little or no speech.	Full or partial overlap with indication for testing	copy_number_variation		6	129969121	132499298	1	6q22.33-6q23.2	Heterozygous	2.5Mb	unknown (not detected in mother)	Disease Association NOS		Uncertain Clinical Significance
00090	LMIC	Male	POSITIVE	growth deficiency, microcephaly, intellectual disability with no speech, hyperactivity, large bulbous nose, epicanthal folds, short philtrum, small mandible. He also had seizures from 3 months to 3 years of age. Family history is pertinent for two maternal uncles who have little or no speech.	Full or partial overlap with indication for testing	copy_number_variation		11	8548056	10497905	3	11p15.4	Heterozygous	1.95 Mb	unknown (not detected in mother)	Disease Association NOS		Uncertain Clinical Significance
00079	HIC	Female	NEGATIVE	muscle weakness, generalized hypotonia of both upper and lower limbs. Needle electromyography suggested possible mild myopathic involvement. Muscle biopsy showed atrophic and regenerating fibers, raising the possibility of muscular dystrophy.
00086	LMIC	Female	POSITIVE	global developmental delay with absence of speech, postnatal growth retardation with microcephaly, seizures, laryngomalacia, and an atrial septal defect. She has dsymorphic features, including a long face, ptosis, upslanting palpebral fissures, medial eyebrow flare, mild micrognathia, an upsweeping hairline, and asymmetric pectus carinatum. She has a history of nasolacrimal duct obstruction and a…	Full or partial overlap with indication for testing	SNV	SMARCA4	19	11132462	11132462	c.2678T>G	Leu893Arg	Heterozygous	missense_variant	de novo	Coffin-Siris Syndrome	DOMINANT	Likely Pathogenic
00060	LMIC	Female	POSITIVE	severe global developmental delay whereby she does not speak or walk and has ataxia. Dysmorphic features include occipital plagiocephaly, downslanting short palpebral fissures, low set posteriorly rotated malformed small ears, smooth philtrum, mild prognathism, bilateral camptodactyly in the 3rd, 4th, and 5th fingers with absent distal interphalangeal creases, hypoplastic thenar eminences, and a …	Full or partial overlap with indication for testing	copy_number_variation		18			4			aneuploidy	unknown, presumed spontaneous	Tetrasomy 18p	unknown, presumed spontaneous	Pathogenic
00091	LMIC	Male	See Below (Inconclusive)	developmental delay, speech delay, behavioral difficulties, neonatal respiratory and feeding difficulties, hyperextensible and buckling phalanges, bilateral hallux valgus, and dysmorphic features including full cheeks, myopathic facies, prognathism, thick pinnas, strabismus, short forehead, bifrontal narrowing, midface hypoplasia, and anteverted nares.	Full or partial overlap with indication for testing	copy_number_variation		14	101261679	101288013	1	14q32.2	Heterozygous	26.3 kb	de novo	14q32.2 Microdeletion Syndrome (Kagami-Ogata Syndrome)	DOMINANT	Uncertain Clinical Significance
00071	HIC	Female	POSITIVE	hypomelanosis of Ito, global development delay including both motor delay and language delay, bilateral mixed hearing loss, sleep apnea, exotropia of both eyes, bilateral optic nerve hypoplasia with lower cerebral volume, obesity, hypotonia, bilateral hydronephrosis with vesico-uretral reflux, abnormal teeth, mild dysmorphism, chronic constipation, urinary incontinence and behavioral struggles.	Full or partial overlap with indication for testing	SNV	PHF6	X	133551328	133551328	c.964T>G	Tyr322Asp	Heterozygous	missense_variant	de novo	Borjeson-ForssmanLehmann syndrome	X_LINKED	Likely Pathogenic
00071	HIC	Female	POSITIVE	hypomelanosis of Ito, global development delay including both motor delay and language delay, bilateral mixed hearing loss, sleep apnea, exotropia of both eyes, bilateral optic nerve hypoplasia with lower cerebral volume, obesity, hypotonia, bilateral hydronephrosis with vesico-uretral reflux, abnormal teeth, mild dysmorphism, chronic constipation, urinary incontinence and behavioral struggles.	Full or partial overlap with indication for testing	copy_number_variation		9	119921770	122047023	3	9q33.1	Heterozygous	2.1 Mb	maternal	Developmental Delay/Intellectual Disability	DOMINANT	Uncertain Clinical Significance
00071	HIC	Female	POSITIVE	hypomelanosis of Ito, global development delay including both motor delay and language delay, bilateral mixed hearing loss, sleep apnea, exotropia of both eyes, bilateral optic nerve hypoplasia with lower cerebral volume, obesity, hypotonia, bilateral hydronephrosis with vesico-uretral reflux, abnormal teeth, mild dysmorphism, chronic constipation, urinary incontinence and behavioral struggles.	Full or partial overlap with indication for testing	copy_number_variation		X	6450986	8136530	3	Xp22.31	Heterozygous	1.7 Mb	maternal	Developmental Delay/Intellectual Disability	DOMINANT	Uncertain Clinical Significance
00103	LMIC	Female	NEGATIVE	congenital anomalies related to hind brain malformation detected via brain MRI, including pontocerebellar hypoplasia with associated hypomyelination and hypotelorism, a thin and flat brainstem, decreased foliation of the cerebellar vermis, and anterior clefting of the pons. Throughout her history of brain imaging, both molar tooth malformation and Dandy-Walker malformation were noted. Additionall…
00089	LMIC	Female	POSITIVE	intellectual disability, developmental delay, whereby she started walking at five years and spoke her first word at six years of age, hypotonia, hemivertibra, and scoliosis. She also presents with minor malformations including long tapered fingers, broad thumbs, broad great toes, hallux valgus, broad columella, relative prognathism, and teeth abnormalities.	Full or partial overlap with indication for testing	deletion	CTNNB1	3	41267274	41267279	c.865_869delACAAA	Thr289CysfsTer2	Heterozygous	frameshift_variant	de novo	CTNNB1-Related Syndromic Intellectual Disability	DOMINANT	Pathogenic
00084	HIC	Female	See Below (Inconclusive)	episodes of ataxia, cyanosis, memory disturbance, speech difficulty, emesis, and severe pain in her arms and legs. Some of these episodes are thought to be related to activity, and she is known to fatigue easily. She is described as having constipation alternating with diarrhea, possibly due to intestinal dismotility, as well as general abdominal distension and possible intussusception. Ventricul…	Full or partial overlap with indication for testing	copy_number_variation		15	22696624	23301066	1	15q11.2	Heterozygous	604 kb	maternal	15q11.2 Deletion Syndrome	DOMINANT	Uncertain Clinical Significance
00076	HIC	Female	NEGATIVE	The reported phenotype is of a previously healthy fifteen year-old girl who was recently hospitalized due to an altered mental state after her family found her unresponsive. A brain CT reportedly revealed a 3.4 cm mass in the patient's left frontal lobe. A subsequent MRIrevealed multifocal white matter lesions and a lesion in the cervical cord with distal nerve root enhancement, which later progr…
00081	HIC	Female	POSITIVE	global developmental delay including intellectual disability and speech delay, strabismus and limited upgaze, history of right grade II vesicoureteral reflux, esotropia and hyperopia, and metatarsus adductus of left foot. Other symptoms include poor eye contact, prominent frontal bossing, deep-set eyes, prominent nasal bridge and columella, patent nares, short and tapered fingers, suspected parox…	Full or partial overlap with indication for testing	SNV	EBF3	10	131757201	131757201	c.482G>A	Cys161Tyr	Heterozygous	missense_variant	de novo	Hypotonia Ataxia and Delayed Development Syndrome (HADDS)	DOMINANT	Likely Pathogenic
00068	HIC	Female	See Below (Inconclusive)	global developmental delay, white matter abnormalities, cortical blindness, borderline macrocephaly, and hypotonia. Notably, two sequential brain MRIs suggest delayed myelination and periatrial white matter signal abnormalities with very limited progression of white matter over a three-month period. She is described as having dysmorphic features, including epicanthal folds, a small and tapered no…	Full or partial overlap with indication for testing	SNV	GATAD2B	1	153788775	153788775	c.1190T>A	Val397Asp	Heterozygous	missense_variant	de novo	GATAD2B-Related Intellectual Disability Syndrome	DOMINANT	Variant of Uncertain Significance
00072	HIC	Female	NEGATIVE	global developmental delays, mild intellectual disability, mild dysmorphic facial features with facial asymmetry and mildly enlarged ventricles, mild hypoplasia of the corpus callosum with suspicion of focal cortical dysplasia. She is also described as having periodic episodes of increased sleepiness, loss of appetite and decreased cognitive/academic functioning.
00109	HIC	Male	See Below (Inconclusive)	multiple congenital anomalies: cleft lip/palate with extension to nasal tip, micrognathia, bilateral limitation to extension of proximal interphalangeal joints of 3rd, 4th, and 5th fingers, pre-axial polydactyly of the right hand with soft tissue connection of a fairly well-developed hypoplastic second thumb structure with a nail, left clubfoot, micropenis with underdeveloped scrotum, cryptorchid…	Full or partial overlap with indication for testing	copy_number_variation		16	15477144	18244322	3	16p13.11-p12.3	Heterozygous	2.8 Mb	maternal	Disease Association NOS	DOMINANT	Uncertain Clinical Significance
00077	HIC	Female	NEGATIVE	global developmental delay without history of regression, abnormal tone (described as hypertonia and hypotonia in the records provided), slight tremor with some fine motor movements, decreased gastric motility, relative microcephaly, right-sided scalp hemangioma, facial differences including periorbital fullness, macrostomia, thick lips, a broad flat nose and mild hypertelorism, and delayed myeli…
00113	HIC	Female	POSITIVE	a history of multiple cardiovascular anomalies including a ventricular septal defect, pulmonary valve redundancy, and premature ventricular contractions. In addition, she has had hydrocephaly and chiari malformation. Dysmorphology examination indicate presence of scoliosis, malar hypoplasia, downslanting palpebral fissures, macrocephaly, high forehead, proptosis, smooth philtrum, low set posterio…	Full or partial overlap with indication for testing	SNV	PIK3CA	3	178951957	178951957	c.3012G>A	Met1004Ile	Heterozygous	missense_variant	de novo	PIK3CA-Related Segmental Overgrowth	DOMINANT	Likely Pathogenic
00097	HIC	Male	NEGATIVE	a history of omphalocele, left sided congenital diaphragmatic hernia, right sided inguinal hernia, poor growth, chronic lung disease, right esotropia and bilateral hyperopia, facial differences including malar hypoplasia, epicanthus inverus, depressed nasal bridge with wide nasal base, smooth philtrum, full cheeks and developmental delays. He was also diagnosed with non-classical congenital adren…
00092	HIC	Male	POSITIVE	dysmorphic craniofacial features, microcephaly, congenital micrognatism, mandibular hypoplasia, cleft palate, conductive hearing loss due to right ear microtia and canal atresia, tracheoesophageal fistula with esophageal atresia, oropharyngeal dysphagia, chronic renal insufficiency due to a solitary and obstructed kidney, hypospadias, and posterior congenital urethral valve.	Full or partial overlap with indication for testing	SNV	EFTUD2	17	42956956	42956956	c.670G>A	Gly224Arg	Heterozygous	missense_variant	de novo	Mandibulofacial Dysostosis-Microcephaly Syndrome	DOMINANT	Likely Pathogenic
00098	HIC	Male	NEGATIVE	gastrointestinal issues, described as inflammatory bowel disease, Crohn's disease, and colitis. He has a history of alternating constipation and diarrhea, with poor weight gain. He is also noted to have short stature, arthralgia, and myopia. Psychiatric conditions have been observed, including depression and anxiety, with one hospital admission involving auditory hallucinations.
00111	HIC	Male	POSITIVE	developmental delay, hypotonia, vertebral anomaly, thyroglossal duct cyst, thyroid hypoplasia, elevated TSH, dysmorphic features, CPAM (congenital adenomatoid malformation) of the lung, abnormal EGG with high risk of seizures, white matter delay on MRI of the brain, history of neonatal hypoglycemia.	Full or partial overlap with indication for testing	SNV	PAX8	2	114002188	114002188	c.205G>A	Gly69Ser	Heterozygous	missense_variant	de novo	Congenital Hypothyroidism	DOMINANT	Likely Pathogenic
00102	HIC	Male	See Below (Inconclusive)	a history of recurrent infections and episodic fevers with a normal CBC, low natural killer cell function, mannose-binding lectin deficiency, and low C4 complement levels but high total complement activity. He has been diagnosed by pediatrics with benign hypermobility syndrome, flat feet, ankle arthralgias without signs of arthritis on physical exam and a flexible calcaneovalgus with midfoot inst…	Incidental Finding	SNV	PROC	2	128186061	128186061	c.925G>A	Ala309Thr	Heterozygous	missense_variant	paternal	Protein C Deficiency	DOMINANT	Pathogenic
00102	HIC	Male	See Below (Inconclusive)	a history of recurrent infections and episodic fevers with a normal CBC, low natural killer cell function, mannose-binding lectin deficiency, and low C4 complement levels but high total complement activity. He has been diagnosed by pediatrics with benign hypermobility syndrome, flat feet, ankle arthralgias without signs of arthritis on physical exam and a flexible calcaneovalgus with midfoot inst…	Full or partial overlap with indication for testing	SNV	MBL2				c.161G>A	Gly54Asp	Heterozygous	missense	paternal	Mannose-Binding Lectin Deficiency	RECESSIVE	Likely Pathogenic
00095	HIC	Male	POSITIVE	developmental delay with regression, intellectual disability with non-verbal communication, failure to thrive withG-tube feeding, and seizures. He is described to be quadraparetic, unable to sit without support, and minimally interactive. Abnormal muscle tone and spasticity have been observed. Various brain imaging studies have identified severe encephalopathy with cortical dysfunction, incomplet…	Full or partial overlap with indication for testing	copy_number_variation		22	51160350	51179682	1	22q13.33	Heterozygous	19.3 kb	de novo	Phelan-McDermid Syndrome	DOMINANT	Pathogenic
00107	HIC	Male	See Below (Inconclusive)	prematurity, dysphagia withGERD (for which he is considered a high aspiration risk and originally dependent onGI-tube, now GJ tube), apnea, bradycardia, left ventricular hypertrophy, a mild lagging in development, and hypoglycemia. He had a prior abnormal EEG reflecting focal epileptiform activity. Physical exam is notable for weight gain crossing percentiles in the upward direction, modest dolic…	Full or partial overlap with indication for testing	SNV	ASXL2	2	25965422	25965422	c.3784G>T	Ala1262Ser	Heterozygous	missense_variant	maternal	Shashi-Pena Syndrome	DOMINANT	Variant of Uncertain Significance
00101	HIC	Male	See Below (Inconclusive)	a history of recurrent viral infections and pneumonias since birth (with multiple hospitalizations) and splenomegaly. He presents functional natural killer cell deficiency, mannose-binding lectin deficiency and low C4 complement. He is described to be hypermobile with pes planus and arthralgias. He is also noted to have hypotonia, significant gastroesophageal reflux, chronic aspiration, dysphagia…	Full or partial overlap with indication for testing	SNV	MBL2				c.161G>A	Gly54Asp	Heterozygous	missense	paternal	Mannose-Binding Lectin Deficiency	RECESSIVE	Likely Pathogenic
00101	HIC	Male	See Below (Inconclusive)	a history of recurrent viral infections and pneumonias since birth (with multiple hospitalizations) and splenomegaly. He presents functional natural killer cell deficiency, mannose-binding lectin deficiency and low C4 complement. He is described to be hypermobile with pes planus and arthralgias. He is also noted to have hypotonia, significant gastroesophageal reflux, chronic aspiration, dysphagia…	Incidental Finding	SNV	TTN	2	179588755	179588755	c.21231G>A	Trp7077Ter	Heterozygous	stop_gained	paternal	TTN-Related Disorders	DOMINANT	Pathogenic
00106	HIC	Male	NEGATIVE	preterm infant (32 weeks) with polyhydramnios and sepsis of newborn, born with long gap esophageal atresia, tracheo-esophageal fistula, laryngeal cleft, pulmonary vascular disease and severe tetraventricular hydrocephalus.
00093	HIC	Male	POSITIVE	developmental delay and concern for developmental regression in language and motor function. His brain MRIrevealed moderate diffuse cerebellar volume loss and normal to slightly decreased myelination. He also has spasticity, hyperreflexia, truncal hypotonia, limb hypertonia, ataxia, cerebellar atrophy, drooling, microcephaly, bilateral hypermetropia, and malar hypoplasia	Full or partial overlap with indication for testing	SNV	TUBB4A	19	6495747	6495747	c.763G>A	Val255Ile	Heterozygous	missense_variant	de novo	Leukodystrophy hypomyelinating 6	DOMINANT	Likely Pathogenic
00112	HIC	Male	POSITIVE	crowded teeth, delayed dentition, abnormal head shape, myopia, astigmatism, over-folded eyelids, ptosis, down-slanting palpebral fissures, sensorineural hearing loss, low set ears, cardiomegaly, widely spaced nipples, pectus excavatum, chronic constipation, hypospadias, penile chordee, short stature, hyperkeratosis, lineas alba, and ADHD	Full or partial overlap with indication for testing	SNV	AMMECR1	X	109560871	109560871	c.429T>A	Tyr143Ter	Hemizygous	stop_gained	de novo	AMMECR1-related syndrome	X_LINKED	Likely Pathogenic
00094	HIC	Female	NEGATIVE	significant hypermobility, hypotonia, joint laxity, soft skin, tall stature, mild scoliosis and a highly arched palate. The patient is also reported to have intellectual disability, language development disorder, attention deficit hyperactivity disorder, behavioral issues, and dysmorphic features.
00130	HIC	Male	NEGATIVE	atopic dermatitis, a recent skin superinfection with numerous group A strep and a few staph aureus, a history of MRSA infection, and developmental delay. In addition, acute kidney injury, acute renal failure, pulmonary edema, and respiratory failure with pulmonary hemorrhage were also noted. The proband also had elevated blood urea nitrogen and creatinine, proteinuria, hypoxemia, and tachypnea. P…
00120	HIC	Female	NEGATIVE	transient neurologic symptoms with leg numbness and weakness, genu recurvatum, prominent scapular winging, shoulder hypermobility, hip and knee pain, fatigue with strenuous activates, and a history of depression and anxiety. Her family history if significant for a paternal uncle's son with bilateral scapular winging and mention of paternal relatives who have undergone unspecified shoulder surgery
00137	LMIC	Male	POSITIVE	severe intellectual disability, hypotonia, prenatal onset growth deficiency, cryptorchidism, microcephaly and dysmorphic features primarily involving the head, face, hands, and feet.	Full or partial overlap with indication for testing	copy_number_variation		1	4436802	22782007	1	1p36.32-p36.13	Heterozygous	18Mb	de novo	1p36 Deletion Syndrome	DOMINANT	Pathogenic
00135	LMIC	Female	NEGATIVE	global developmental delay, proximal muscle weakness, and her height and weight are below the 1st percentile. She also presents with low muscle bulk and subcutaneous fat, thin extremities, pectus excavatum, and a rotated thoracic cage. In addition, she experiences difficulty in walking and also standing from a sitting position, has ears with prominent antihelix, a short neck, kyphotic posture, wi…
00129	HIC	Female	See Below (Inconclusive)	failure to thrive, regression with multiple developmental milestones missed, respiratory distress, hypertension, laryngomalacia, abnormal reflexes and muscle movements, dysconjugate eye movements, nystagmus, increased upper limb hypertonia, reduced white matter and thalamic volume with no seizure activity. Laboratory testing on body fluids shows metabolic acidosis with anion gap, ketouria, glucos…	Full or partial overlap with indication for testing	SNV	SCO2	22	50962144	50962144	c.697C>G	Pro233Ala	Homozygous	missense_variant	both	SCO2-Related Disorders	RECESSIVE	Variant of Uncertain Significance
00133	LMIC	Female	POSITIVE	clinically suspected Rett syndrome. She has a history of developmental regression, including loss of language and purposeful hand movement with onset around 15 months of age. Currently she does not have expressive language, displays repetitive hand movements, has some features of autism and is dependent on all activities of daily living. She has severe scoliosis and a mildly ataxic gait, but does…	Full or partial overlap with indication for testing	SNV	MECP2	X	153296363	153296363	c.916C>T	Arg306Cys	Heterozygous	missense_variant	unknown (not detected in mother)	Rett Syndrome	X_LINKED	Pathogenic
00087	LMIC	Female	POSITIVE	a surgically corrected patent ductus arteriosus, pulmonary hypertension, and poor growth with microcephaly where her height, weight, and head circumference are <3rd percentile. In addition, she is described to have some dysmorphic features, including bilateral 5th finger clinodactyly, hypoplastic nails, mid-face hypoplasia, downturned corners of her mouth, a smooth philtrum, proturberant and ante…	Full or partial overlap with indication for testing	copy_number_variation		15	98615561	102400033	1	15q26.3	Heterozygous	3.78 Mb	de novo	Disease Association NOS	DOMINANT	Pathogenic
00087	LMIC	Female	POSITIVE	a surgically corrected patent ductus arteriosus, pulmonary hypertension, and poor growth with microcephaly where her height, weight, and head circumference are <3rd percentile. In addition, she is described to have some dysmorphic features, including bilateral 5th finger clinodactyly, hypoplastic nails, mid-face hypoplasia, downturned corners of her mouth, a smooth philtrum, proturberant and ante…	Full or partial overlap with indication for testing	copy_number_variation		13	99892724	115108414	3	13q32.2q34	Heterozygous	15.21 Mb	de novo	Disease Association NOS	DOMINANT	Pathogenic
00139	LMIC	Male	POSITIVE	a suspected dysmorphic syndrome which is also present in the father. The proband has hypertelorism, mild downslanted palpebral fissures, mildly everted upper eyelids, a tented upper lip, mild retrognathia, low set ears, a right preauricular pit, bilateral single palmar transverse crease, small hands with brachydactyly, fifth finger clinodactyly, and persistent fetal pads. His height and weight ar…	Full or partial overlap with indication for testing	copy_number_variation		1	170777500	173113232	1	1q24.2-q25.1	Heterozygous	2.3 Mb	paternal	1q24-q25 Deletion Syndrome	DOMINANT	Uncertain Clinical Significance
00117	HIC	Male	POSITIVE	a history of Pierre Robin sequence with esophageal narrowing, a cleft palate that was surgically repaired, sialorrhea, poor growth, and feeding difficulties requiring g-tube feeding. In addition, his phenotype also includes microcephaly, short stature, low weight, and developmental delay. An echocardiogram indicated the presence of mild tricuspid regurgitation, mild mitral regurgitation, atrial s…	Full or partial overlap with indication for testing	copy_number_variation		12	116472293	116558850	1	12q24.21	Heterozygous	86.6 kb	de novo	Cardiac Anomalies-Developmental Delay-Facial Dysmorphism Syndrome	DOMINANT	Likely Pathogenic
00136	LMIC	Female	POSITIVE	severe intellectual disability and developmental delay whereby she started walking at two years of age and only speak a few words. She displays aggressive behavior towards herself and others and is very anxious. In addition, an increase in extra-axial space and dilatation of the Virchow-Robin space were noted during MRI testing. Dysmorphology examination indicated presence of macrocephaly, upslan…	Full or partial overlap with indication for testing	copy_number_variation		5	175470000	177450000	1	5q35.2-q35.3	Heterozygous	2Mb	de novo	Sotos Syndrome	DOMINANT	Pathogenic
00110	HIC	Female	NEGATIVE	hypermobility/laxity in all joints, mild paresis with easy fatigue, hypotonia, and obesity with no known endocrine cause. Skin and muscle biopsies are reported to show no abnormalities, and CK testing at age 2.75 was normal.
00138	LMIC	Male	NEGATIVE	a clinical diagnosis of septo-optic dysplasia based on MRI findings. Optic nerve atrophy and blindness were noted on ophthalmology exam. Microcephaly, developmental delay, and poor weight gain with growth retardation and possible renal tubular acidosis are reported. He has a history of very low somatomedin levels and minimally elevated thyroid stimulating hormone levels. No seizures or dysmorphic…
00134	LMIC	Female	POSITIVE	seizures since birth, hypertonia, spasticity, nystagmus, severe developmental delay with concern for regression and multiple hernias. She did not pass the newborn hearing screen and formal testing is pending	Full or partial overlap with indication for testing	SNV	GRIA3	X	122561893	122561893	c.1979G>C	Arg660Thr	Heterozygous	missense_variant	de novo	GRIA3-related complex neurodevelopmental disorder	X_LINKED	Likely Pathogenic
00096	HIC	Female	POSITIVE	global developmental delay, gastrointestinal problems including gastroesophageal reflux disease and chronic constipation, poor growth, and failure to thrive. She has truncal hypotonia, hypertonia of the extremities, motor apraxia, decreased eye contact, and keeps her hands clasped at her midline. She is also noted to have brachycephaly, a prominent occiput, deep set eyes, mild retromicrognathia, …	Full or partial overlap with indication for testing	SNV	DYRK1A	21	38868418	38868418	c.1099-2A>C		Heterozygous	splice_acceptor_variant	de novo	DYRK1A-Related Intellectual Disability Syndrome	DOMINANT	Pathogenic
00119	HIC	Female	POSITIVE	a history of a seizure disorder that was secondary to a hypothalamic hamartoma. She also has developmental delay, bilateral cortical visual impairment, premature thelarche, and dysmorphic features that include asymmetric and coarse face, long eyelashes, downslanting palpebral fissures, deep set eyes, ear asymmetry and bilateral pointed helix with uplifted earlobes, broad nose with bulbous tip, th…	Full or partial overlap with indication for testing	deletion	ARID1B	6	157527539	157527543	c.5267_5270delAAAG	Glu1756AlafsTer9	Heterozygous	frameshift_variant	de novo	Coffin-Siris Syndrome	DOMINANT	Pathogenic
00123	HIC	Female	See Below (Inconclusive)	myopathy and a history of severe respiratory and feeding difficulties in the neonatal period that improved with age. Currently, the myopathy is most pronounced in the facial and bulbar muscles and speech is significantly affected. The patient has velopharyngeal insufficiency and is described as having a myopathic gestalt including ptosis, downturned corner of the mouth, a cupid's bow shape to mou…	Incidental Finding	SNV	F2	11	46761055	46761055	c.*97G>A		Heterozygous	3_prime_UTR_variant	paternal	Prothrombin Deficiency	RECESSIVE	Pathogenic
00154	HIC	Female	POSITIVE	severe hypotonia and vomiting in the first days of life global developmental delay speech delay muscular hypotrophy and epilepsy. A brain MRI revealed that she has hypoplasia of the corpus callosum and Arnold-Chiari malformation type 1. The patient's has dysmorphic features including hypotonic face tented upper lip ptosis alveolar ridge hyperplasia and ogival palate.	Full or partial overlap with indication for testing	SNV	ASXL1	20	31023304	31023304	c.2789G>A	Trp930Ter	Heterozygous	stop_gained	de novo	Bohring-Opitz Syndrome	DOMINANT	Pathogenic
00114	HIC	Male	POSITIVE	global developmental and speech delay dysmorphic features severe gastroesophageal reflux feeding difficulties and hypotonia. The facies presents with a broad face high forehead high anterior hairline midface hypoplasia and deep-set eyes with strabismus posteriorly rotated ears and a short broad nose.	Full or partial overlap with indication for testing	SNV	TBL1XR1	3	176756105	176756105	c.1043A>G	His348Arg	Heterozygous	missense_variant	de novo	Pierpont Syndrome	DOMINANT	Pathogenic
00099	HIC	Male	POSITIVE	congenital hypertonia stridor nystagmus skeletal abnormalities which include rhizomelic shortening scoliosis and torticollis bone dysplasia presence of hypomyelination and a thin corpus callosum detected through a brain MRI bulbar dysfunction and feeding difficulties which require the use of a G-tube episodes of dystonia and breath holding developmental delay in both gross and fine motor skills a…	Full or partial overlap with indication for testing	SNV	DEGS1				c.775C>T	His259Tyr	Heterozygous	missense	maternal	DEGS1-Related Hypomyelinating Leukodystrophy	RECESSIVE	Likely Pathogenic
00099	HIC	Male	POSITIVE	congenital hypertonia stridor nystagmus skeletal abnormalities which include rhizomelic shortening scoliosis and torticollis bone dysplasia presence of hypomyelination and a thin corpus callosum detected through a brain MRI bulbar dysfunction and feeding difficulties which require the use of a G-tube episodes of dystonia and breath holding developmental delay in both gross and fine motor skills a…	Full or partial overlap with indication for testing	SNV	DEGS1				c.395A>G	His132Arg	Heterozygous	missense	paternal	DEGS1-Related Hypomyelinating Leukodystrophy	RECESSIVE	Likely Pathogenic
00088	LMIC	Male	POSITIVE	intermittent rash; telangiectasia; acroparesthesia; numbness pain and swelling of extremities; joint pain; facial flushing; and headaches. A CT scan revealed hypoperfusion in the left parietal lobe relating to ischemia. He also has hypertrophic cardiomyopathy expressive speech delay and a learning disability.	Full or partial overlap with indication for testing	copy_number_variation		8	7153587	12245784	3	8p23.1	Heterozygous	5.1 Mb	de novo	8p23.1 duplication syndrome	DOMINANT	Pathogenic
00125	HIC	Male	See Below (Inconclusive)	a history of developmental delay hypotonia nystagmus ataxia and white matter abnormalities consistent with leukodystrophy.	Incidental Finding	SNV	F11	4	187195347	187195347	c.403G>T	Glu135Ter	Heterozygous	stop_gained	paternal	Factor XI Deficiency	DOMINANT	Pathogenic
00121	HIC	Female	See Below (Inconclusive)	bilateral renal agenesis identified through post-natal renal ultrasound consistent with prenatal findings of renal dysplasia and oligohydramnios. She has ambiguous genitalia including fused labia with possible cloacal malformation and no palpable gonads. Echocardiogram on day-of-life 1 revealed a floppy atrial septum with secundum atrial septal defect and moderate-sized patent ductus arteriosus. …	Incidental Finding	copy_number_variation		16	21805656	22441329	1	16p12.2	Heterozygous	635.67 kb	maternal	16p12.2 microdeletion syndrome	DOMINANT	Pathogenic
00080	HIC	Female	POSITIVE	a history of omphalocele with repair and persistent hypomyelination noted on brain MRIs. She has been described to have developmental delay auditory processing disorder dysarthria attention-deficit hyperactivity disorder and anxiety with mention of sleep disturbance. Ataxia axial hypotonia and appendicular hypertonia were findings of a recent neurological exam. An echocardiogram performed at unde…	Full or partial overlap with indication for testing	SNV	TUBB4A	19	6495779	6495779	c.731G>A	Gly244Asp	Heterozygous	missense_variant	unknown (not detected in mother)	Leukodystrophy hypomyelinating 6	DOMINANT	Pathogenic
00149	HIC	Male	POSITIVE	autism spectrum disorder intellectual disability a history of seizures and a congenital cataract of the right eye. He displays some dysmorphic features that include bifid uvula poor dentition tented upper lip slightly mottled appearance to skin inverted nipples and increased carrying angle of the arms. It was noted that he tends to overheat and does not sweat.	Full or partial overlap with indication for testing	deletion	HNRNPU	1	245027025	245027026	c.584delC	Ala195GlyfsTer2	Heterozygous	frameshift_variant	de novo	Epileptic Encephalopathy	DOMINANT	Pathogenic
00100	HIC	Male	See Below (Inconclusive)	history of a static hypomyelinating condition of uncertain etiology with mild atrophy of gray matter appearing later in life microcephaly bilateral optic atrophy (legally blind) diffuse hypotonia epilepsy motor apraxia global developmental delay autistic behaviors and compulsions. He is also noted to be nonverbal have decreased pain perception a vertical nystagmus and a broad-based gait. He is de…	Full or partial overlap with indication for testing	SNV	IGBP1	X	69353802	69353802	c.5C>G	Ala2Gly	Hemizygous	missense_variant	maternal	Corpus callosum agenesis of with intellectual disability ocular coloboma and micrognathia	X_LINKED	Variant of Uncertain Significance
00143	HIC	Female	NEGATIVE	possible seizures with eye deviation and body stiffening lethargy hyper-attenuation in the basal ganglia and subcortical white matter of parietal lobes possibly secondary to mineralization noted on brain CT parenchymal loss biliary sludge noted on abdominal ultrasound oropharyngeal dysphagia gastroesophageal reflux skin ulcers elevated liver function tests including alanine transaminase and aspar…
00127	HIC	Male	POSITIVE	leukodystrophy microcephaly feeding difficulties requiring a G-tube lower limb spasticity cerebellar atrophy developmental delay and regression speech regression nystagmus optic atrophy peripheral neuropathy scoliosis hip dysplasia	Full or partial overlap with indication for testing	SNV	HIKESHI	11	86017416	86017416	c.160G>C	Val54Leu	Homozygous	missense_variant	both	Leukodystrophy Hypomyelinating 13	RECESSIVE	Likely Pathogenic
00148	HIC	Male	POSITIVE	developmental delay dysmorphic features and congenital anomalies. He is described to have a long dysmorphic face with malar flattening sparse eyebrows hypertelorism telecanthus downslanting palpebral fissures blepharophimosis ptosis (s/p surgical intervention) and microstomia with downturned corners of the mouth. His ears are cupped simple low set and posteriorly rotated. He has a U-shaped cleft …	Full or partial overlap with indication for testing	deletion	KAT6B	10	76790222	76790223	c.5646delC	Asn1883ThrfsTer2	Heterozygous	frameshift_variant	de novo	KAT6B-Related Spectrum Disorders	DOMINANT	Pathogenic
00141	HIC	Male	POSITIVE	Severe seizures that required resection of the left temporal lobe at the age of 2 aggressive behavior autism spectrum disorder intellectual disability sleep problems ataxia developmental delay repetitive movements food and texture avoidance	Full or partial overlap with indication for testing	SNV	DEPDC5	22	32211195	32211195	c.1663C>T	Arg555Ter	Heterozygous	stop_gained	paternal	Familial focal epilepsy with variable foci	DOMINANT	Pathogenic
00141	HIC	Male	POSITIVE	Severe seizures that required resection of the left temporal lobe at the age of 2 aggressive behavior autism spectrum disorder intellectual disability sleep problems ataxia developmental delay repetitive movements food and texture avoidance	Incidental Finding	SNV	CHEK2	22	29121230	29121230	c.573+1G>A		Heterozygous	splice_donor_variant	maternal	CHEK2-Related Cancer Susceptibility	DOMINANT	Pathogenic
00152	HIC	Female	POSITIVE	global developmental delay hypotonia abnormal MRI with findings of hypomyelination and white matter hypoplasia with thinning of the corpus callosum cortical blindness and moderate dysmorphic features. She is described as overweight with a history of feeding difficulties and reflux.	Full or partial overlap with indication for testing	SNV	GRIN1	9	140056634	140056634	c.1706G>A	Arg569Gln	Heterozygous	missense_variant	de novo	GRIN1-related complex neurodevelopmental disorder	DOMINANT	Likely Pathogenic
00160	HIC	Female	POSITIVE	global developmental delay intellectual disability epilepsy cerebral palsy apraxia ataxia dysarthria truncal hypotonia extremity hypertonia cafe au lait spot subluxation of the metacarpal phalangeal joint of the thumb hyperopia possible hemiplegia and sacral dimple. The proband and her affected brother are noted to share some clinical features including epilepsy low IgA and IgG balance and coordi…	Full or partial overlap with indication for testing	SNV	DHPS				c.518A>G	Asn173Ser	Heterozygous	missense_variant	unknown (not detected in father)	DHPS-related neurodevelopmental disorder	RECESSIVE	Pathogenic
00160	HIC	Female	POSITIVE	global developmental delay intellectual disability epilepsy cerebral palsy apraxia ataxia dysarthria truncal hypotonia extremity hypertonia cafe au lait spot subluxation of the metacarpal phalangeal joint of the thumb hyperopia possible hemiplegia and sacral dimple. The proband and her affected brother are noted to share some clinical features including epilepsy low IgA and IgG balance and coordi…	Full or partial overlap with indication for testing	SNV	DHPS				c.1014+1G>A		Heterozygous	splice_donor_variant	paternal	DHPS-related neurodevelopmental disorder	RECESSIVE	Likely Pathogenic
00118	HIC	Female	NEGATIVE	gastroparesis chronic intestinal pseudo-obstruction chronic nausea dysautonomia ataxia muscle weakness and convergence insufficiency.
00157	HIC	Female	NEGATIVE	developmental delay scoliosis oar-shaped ribs limited joint mobility subcutaneous nodules and dysplastic aortic and mitral valves causing mild aortic stenosis and insufficiency. She is also noted to have coarse facial features high arched palate dental abnormalities and gingival hypertrophy. She is suspected to have an undiagnosed lysosomal storage disease.
00153	HIC	Female	See Below (Inconclusive)	suspected hereditary sensory autonomic polyneuropathy (HSAN) with congenital insensitivity to pain. Her additional clinical features include poor dental growth anhidrosis neurogenic bladder and Charcot joints.	Full or partial overlap with indication for testing	SNV	PRDM12	9	133542063	133542063	c.292G>A	Glu98Lys	Heterozygous	missense_variant	unknown	Hereditary Sensory and Autonomic Neuropathy Type VIII	RECESSIVE	Variant of Uncertain Significance
00146	HIC	Male	NEGATIVE	The proband initially showed normal development until losing the ability to roll at six months. The proband displays global developmental issues with intermittent periods of worsening that are characterized by irritability poor feeding and exaggerated startle response. The proband also presents with dystonia encephalopathy central hypotonia and extremity hypertonia. Elevated neopterin and C26/C22…
00150	HIC	Male	See Below (Inconclusive)	common variable immune deficiency natural killer cell deficiency recurrent pneumonia chronic sinusitis asthma atopic dermatitis keratosis pillaris sepsis abcesses and other infections Ehlers Danlos syndrome type 3 (hypermobility type) juvenile rheumatoid arthritis unspecified bleeding disorder small platelets and abnormally low platelet counts mitochondrial disease metabolic disease lactic acidem…	Full or partial overlap with indication for testing	SNV	TNFRSF13B	17	16843759	16843759	c.512T>G	Leu171Arg	Heterozygous	missense_variant	paternal	Common Variable Immune Deficiency Recessive	DOMINANT	Variant of Uncertain Significance
00150	HIC	Male	See Below (Inconclusive)	common variable immune deficiency natural killer cell deficiency recurrent pneumonia chronic sinusitis asthma atopic dermatitis keratosis pillaris sepsis abcesses and other infections Ehlers Danlos syndrome type 3 (hypermobility type) juvenile rheumatoid arthritis unspecified bleeding disorder small platelets and abnormally low platelet counts mitochondrial disease metabolic disease lactic acidem…	Full or partial overlap with indication for testing	SNV	MBL2	10	54531235	54531235	c.161G>A	Gly54Asp	Heterozygous	missense_variant	paternal	Mannose-Binding Lectin Deficiency	RECESSIVE	Likely Pathogenic
00150	HIC	Male	See Below (Inconclusive)	common variable immune deficiency natural killer cell deficiency recurrent pneumonia chronic sinusitis asthma atopic dermatitis keratosis pillaris sepsis abcesses and other infections Ehlers Danlos syndrome type 3 (hypermobility type) juvenile rheumatoid arthritis unspecified bleeding disorder small platelets and abnormally low platelet counts mitochondrial disease metabolic disease lactic acidem…	Incidental Finding	SNV	GALT	9	34648167	34648167	c.563A>G	Gln188Arg	Heterozygous	missense_variant;splice_region_variant	maternal	Galactosemia	RECESSIVE	Pathogenic
00150	HIC	Male	See Below (Inconclusive)	common variable immune deficiency natural killer cell deficiency recurrent pneumonia chronic sinusitis asthma atopic dermatitis keratosis pillaris sepsis abcesses and other infections Ehlers Danlos syndrome type 3 (hypermobility type) juvenile rheumatoid arthritis unspecified bleeding disorder small platelets and abnormally low platelet counts mitochondrial disease metabolic disease lactic acidem…	Incidental Finding	SNV	GALT	9	34649442	34649442	c.940A>G; c.-119_- 116delGTCA	Asn314Asp	Heterozygous	missense_variant	paternal	Duarte Variant Galactosemia	RECESSIVE	Pathogenic
00144	HIC	Male	See Below (Inconclusive)	primary immune deficiency disorder IgE deficiency hypotonia with babinski reflex on the left side epilepsy gastrointestinal reflux gastroparesis mitochondrial metabolism defect lactic acidemia low plasma carnitine motor delay ptosis seizures recurrent headaches scoliosis frequent colds and infections chronic sinusitis asthma abnormal gait atopic dermatitis with a rash on the face reactive lymphad…	Incidental Finding	SNV	GALT	9	34649442	34649442	c.940A>G; c.-119_- 116delGTCA	Asn314Asp	Heterozygous	missense_variant	paternal	Duarte Variant Galactosemia	RECESSIVE	Pathogenic
00144	HIC	Male	See Below (Inconclusive)	primary immune deficiency disorder IgE deficiency hypotonia with babinski reflex on the left side epilepsy gastrointestinal reflux gastroparesis mitochondrial metabolism defect lactic acidemia low plasma carnitine motor delay ptosis seizures recurrent headaches scoliosis frequent colds and infections chronic sinusitis asthma abnormal gait atopic dermatitis with a rash on the face reactive lymphad…	Incidental Finding	SNV	GALT	9	34648167	34648167	c.563A>G	Gln188Arg	Heterozygous	missense_variant;splice_region_variant	maternal	Galactosemia	RECESSIVE	Pathogenic
00105	HIC	Male	NEGATIVE	Profound global developmental delays growth failure microcephaly vision loss and bilateral eye abnormalities felt to be on the Axenfield-Rieger spectrum hypoplastic pituitary gyration abnormalities and buphthalmos optic nerve cupping and hypoplasia respiratory insufficiency with possible pulmonary hypertension mild left ventricular outflow tract narrowing fatty liver disease hypothyroidism absent…
00177	LMIC	Female	POSITIVE	prenatal onset growth retardation and failure to thrive striking generalized hypotonia with head lag gross motor developmental delay a cardiac atrial septal defect with pulmonary insufficiency mild nasopharyngeal reflux and multiple minor malformations including dysmorphic features. At birth the patient was placed on a ventilator for three days and was admitted to the NICU for 19 days. She has ha…	Full or partial overlap with indication for testing	copy_number_variation		14	101522804	107289470	1	14q32.31-qter	Heterozygous	5.76 Mb	de novo	14q32.3 Terminal Deletion Syndrome	DOMINANT	Pathogenic
00179	LMIC	Male	POSITIVE	short stature severe hip dysplasia with flattening and obliteration of the epiphysis a small fragmented proximal humeral epiphysis an increased span to height ratio an increased upper to lower segment ratio limited elbow extension asymmetric pectus carinatum lumbar lordosis an umbilical hernia and tapering calves. He is otherwise healthy with typical cognition. He has a clinical diagnosis of a sk…	Full or partial overlap with indication for testing	SNV	COL2A1	12	48371427	48371427	c.3121G>A	Gly1041Ser	Heterozygous	missense_variant	de novo	Type II Collagenopathies	DOMINANT	Pathogenic
00182	LMIC	Female	POSITIVE	prenatal and postnatal growth deficiency microcephaly microtia atresia of the right ear canal Pierre Robin sequence with cleft palate bilateral ear tags strabismus proximal thumbs developmental delay and intellectual disability. The proband has a diagnosis of mandibulofacial dysostosis with microcephaly.	Full or partial overlap with indication for testing	SNV	RAF1	3	12626110	12626110	c.1850A>T	Asn617Ile	Heterozygous	missense_variant	maternal	Noonan Syndrome	DOMINANT	Variant of Uncertain Significance
00182	LMIC	Female	POSITIVE	prenatal and postnatal growth deficiency microcephaly microtia atresia of the right ear canal Pierre Robin sequence with cleft palate bilateral ear tags strabismus proximal thumbs developmental delay and intellectual disability. The proband has a diagnosis of mandibulofacial dysostosis with microcephaly.	Full or partial overlap with indication for testing	insertion	EFTUD2	17	42936505	42936505	c.1904dupT	Tyr636LeufsTer8	Heterozygous	frameshift_variant	de novo	Mandibulofacial Dysostosis-Microcephaly Syndrome	DOMINANT	Pathogenic
00180	LMIC	Female	NEGATIVE	Pierre-Robin sequence with a U-shaped cleft palate micrognathia and glossoptosis. The pregnancy was remarkable for multiple threatened abortions and polyhydramnios. Dysmorphic features include a long philtrum distal tapering of the fingers (particularly the phalanges) and fingernails that are strikingly narrow and long. The patient's anus is described to be slightly anteriorly displaced. Family h…
00175	LMIC	Female	POSITIVE	developmental delay intellectual disability hypotonia dysmorphic facial features partial 2-3 and 3-4 syndactyly of the hands astigmatism anterior crosbite and sleep apnea	Full or partial overlap with indication for testing	copy_number_variation		1	234117880	236536349	1	1q42.2-q42.3	Heterozygous	2.4 Mb	de novo	1q4 Deletion	DOMINANT	Pathogenic
00178	LMIC	Female	POSITIVE	developmental delay intellectual disability with expressive language delay behavioral issues joint laxity loose skin easy bruising and low tone. She was described to have a bifid uvula esotropia epicanthal folds short palpebral fissures strabismus two supernumerary nipples diastasis recti overlapping toes flat feet a single transverse palmar crease prominent finger pads on her right hand and 4th …	Full or partial overlap with indication for testing	copy_number_variation		21	47590586	48101334	1	21q22.3	Heterozygous	510.8 kb	unknown (not detected in mother)	Disease Association NOS	DOMINANT	Uncertain Clinical Significance
00178	LMIC	Female	POSITIVE	developmental delay intellectual disability with expressive language delay behavioral issues joint laxity loose skin easy bruising and low tone. She was described to have a bifid uvula esotropia epicanthal folds short palpebral fissures strabismus two supernumerary nipples diastasis recti overlapping toes flat feet a single transverse palmar crease prominent finger pads on her right hand and 4th …	Full or partial overlap with indication for testing	copy_number_variation		3	60000	34461438	3	p26.3p22.3	Heterozygous	34.4 Mb	unknown (not detected in mother)	Partial trisomy 3p syndrome	DOMINANT	Pathogenic
00156	HIC	Female	NEGATIVE	epilepsy spasms and developmental delay. Imaging of the brain revealed periventricular leukomalacia corpus callosum hypoplasia and decreased diffuse brain volume with progressive changes that may be suggestive of a neurodegenerative disease. She is also noted to have brachycephaly strabismus and feeding difficulties. Blood tests indicated neutropenia lymphocytosis hemolytic anemia and abnormally …
00181	LMIC	Female	POSITIVE	intellectual disability short stature slow growth motor delay severe gastroesophageal reflux joint hypermobility small hands with brachydactyly hypoplastic distal phalanges and very short metacarpals and metatarsals especially of the fourth and fifth digits. Dysmorphic features include prominent eyebrows deep set eyes a large nose with a high and broad nasal bridge and square tip and mild microgn…	Full or partial overlap with indication for testing	SNV	HDAC8	X	71681916	71681916	c.943T>A	Trp315Arg	Heterozygous	missense_variant	de novo	Cornelia de Lange Syndrome	X_LINKED	Likely Pathogenic
00124	HIC	Female	POSITIVE	lissencephaly microcephaly cerebellar vermis hypoplasia and Dandy-Walker malformation agenesis of the corpus callosum and clinical/subclinical seizures.	Full or partial overlap with indication for testing	SNV	TUBA1A	12	49578884	49578884	c.1265G>A	Arg422His	Heterozygous	missense_variant	unknown, not from mother, not in sister	Lissencephaly Dominant	DOMINANT	Pathogenic
00126	HIC	Male	POSITIVE	global developmental delays tone abnormalities poor visual tracking and fixation failure to thrive and prenatal-onset white matter abnormalities with temporal and frontal lobe predominance.	Full or partial overlap with indication for testing	SNV	ST3GAL5	2	86075309	86075309	c.337C>T	Gln113Ter	Heterozygous	stop_gained	unknown (not detected in mother)	Amish Infantile Epilepsy Syndrome	RECESSIVE	Pathogenic
00126	HIC	Male	POSITIVE	global developmental delays tone abnormalities poor visual tracking and fixation failure to thrive and prenatal-onset white matter abnormalities with temporal and frontal lobe predominance.	Full or partial overlap with indication for testing	SNV	ST3GAL5	2	86067461	86067461	c.1063G>A	Glu355Lys	Heterozygous	missense_variant	maternal	Amish Infantile Epilepsy Syndrome	RECESSIVE	Pathogenic
00176	LMIC	Female	NEGATIVE	short stature microcephaly intellectual disability delayed puberty and dysmorphic features including smooth philtrum with thin vermillion of the upper lip bifid uvula long narrow fingers and abnormal palmar creases. Eczematous lesions some resembling ichthyosis are diffuse throughout the body and worse in flexures and recurrent tonsillitis without fever are noted.
00158	HIC	Female	NEGATIVE	Drug-resistant epileptic encephalopathy progressive microcephaly global developmental delay diffuse cerebral atrophy bilateral cortical visual impairment retinal dystrophy and exotropia central hypotonia and peripheral hypertonia spasticity dystonia and feeding difficulties.
00174	LMIC	Female	NEGATIVE	developmental delay expressive language delay mixed hearing loss posteriorly rotated ears mild ptosis hypermetropia and strabismus. She is also suspected to have mosacism given skeletal asymmetry including a small humerus on left arm hypoplasia of the left shoulder girdle left 4th finger camptodactyly left 5th finger clinodactyly and hyper- and hypo-pigmented patchy skin lesions on her legs. She …
00142	HIC	Female	See Below (Inconclusive)	growth delay developmental delay language delay multiple skeletal anomalies which include skeletal hypoplasia dysplasia and scoliosis. Brain MRI was abnormal at birth with a reported abnormality of the corpus callosum. Dysmorphic features include microretrognathia macrocephaly high arched palate abnormal dentition upslanting palpebral fissures short nose low set ears flat nasal bridge and short n…	Full or partial overlap with indication for testing	deletion	MIB1	18	19359520	19359522	c.784_785delCA	Gln262ValfsTer11	Heterozygous	frameshift_variant	paternal	Disease Association NOS	Unknown	Variant of Uncertain Significance
00142	HIC	Female	See Below (Inconclusive)	growth delay developmental delay language delay multiple skeletal anomalies which include skeletal hypoplasia dysplasia and scoliosis. Brain MRI was abnormal at birth with a reported abnormality of the corpus callosum. Dysmorphic features include microretrognathia macrocephaly high arched palate abnormal dentition upslanting palpebral fissures short nose low set ears flat nasal bridge and short n…	Full or partial overlap with indication for testing	SNV	MIB1	18	19433156	19433156	c.2642G>A	Cys881Tyr	Heterozygous	missense_variant	maternal	Disease Association NOS	Unknown	Variant of Uncertain Significance
00145	HIC	Male	NEGATIVE	white matter abnormalities identified on MRI including delayed myelination within the context of global developmental delay axial hypotonia tremor and ataxia. This individual's history is notable for laryngomalacia and laryngeal cleft (s/p repair) feeding issues shuddering events and tethered cord. Elevated creatine phosphokinase is noted in laboratory results.
00172	LMIC	Female	POSITIVE	fatigue muscle pain exercise intolerance abnormal gait frequent falls bilateral ptosis a history or respiratory infections asthma short stature short fifth metacarpals bilaterally and right-sided fifth finger clinodactyly learning difficulties aggressive behavior anxiety and amenorrhea. Muscle biopsy in 2012 of the right quadriceps showed non-specific focal atrophy and a nerve conduction study in…	Full or partial overlap with indication for testing	deletion	CHRNE	17	4802583	4802596	c.1116_1128delGTCGTCGGTGGGC	Ser373TyrfsTer8	Homozygous	frameshift_variant	unknown	Congenital Myasthenic Syndrome Dominant/Recessive	RECESSIVE	Likely Pathogenic
00173	LMIC	Male	POSITIVE	developmental delay speech delay learning and language impairment hypotonia distal arthrogryposis and camptodactyly. The proband is also noted to have dysmorphic features including midface hypoplasia tubular nose small mouth secondary alveolar hyperplasia and abnormal palmar creases.	Full or partial overlap with indication for testing	SNV	NEB	2	152500644	152500644	c.7645-1G>C		Heterozygous	splice_acceptor_variant	maternal	Nemaline Myopathy Recessive	RECESSIVE	Likely Pathogenic
00173	LMIC	Male	POSITIVE	developmental delay speech delay learning and language impairment hypotonia distal arthrogryposis and camptodactyly. The proband is also noted to have dysmorphic features including midface hypoplasia tubular nose small mouth secondary alveolar hyperplasia and abnormal palmar creases.	Full or partial overlap with indication for testing	SNV	NEB	2	152468877	152468877	c.11628G>A	Trp3876Ter	Heterozygous	stop_gained	unknown (not detected in mother)	Nemaline Myopathy Recessive	RECESSIVE	Likely Pathogenic
00171	LMIC	Female	NEGATIVE	developmental delay distal arthrogryposis cleft palate severe plagiocephaly strabismus and hearing loss.
00122	HIC	Male	POSITIVE	recurrent seizures that began at a few weeks of age. He also presents with hypotonia global developmental delay oropharyngeal dysphagia with congenital larygomalacia gastroesophageal reflux disease and is G-tube dependent.	Full or partial overlap with indication for testing	SNV	STXBP1	9	130438189	130438189	c.1217G>A	Arg406His	Heterozygous	missense_variant	de novo	Early Infantile Epileptic Encephalopathy Autosomal Dominant	DOMINANT	Pathogenic
00183	LMIC	Male	POSITIVE	clinical features suggestive of Kaufman oculocerebrofacial syndrome including developmental delays poor feeding and failure to thrive microcephaly recurrent infections sleep apnea bilateral eye abnormalities including epicanthal folds entropion and blepharophimosis cup-shaped ears with a right ear tag smooth philtrum bilateral single transverse palmar creases and hypoplastic thenar creases diasta…	Full or partial overlap with indication for testing	SNV	UBE3B	12	109926447	109926447	c.518C>A	Ser173Ter	Heterozygous	stop_gained	maternal	Kaufman oculocerebrofacial syndrome	RECESSIVE	Pathogenic
00183	LMIC	Male	POSITIVE	clinical features suggestive of Kaufman oculocerebrofacial syndrome including developmental delays poor feeding and failure to thrive microcephaly recurrent infections sleep apnea bilateral eye abnormalities including epicanthal folds entropion and blepharophimosis cup-shaped ears with a right ear tag smooth philtrum bilateral single transverse palmar creases and hypoplastic thenar creases diasta…	Full or partial overlap with indication for testing	SNV	UBE3B	12	109921417	109921417	c.61G>T	Glu21Ter	Heterozygous	stop_gained	paternal	Kaufman oculocerebrofacial syndrome	RECESSIVE	Pathogenic
00170	LMIC	Male	See Below (Inconclusive)	primary microcephaly and seizures possible attention deficit and intellectual disability large eyes large ears (due to microcephaly) and long eyelashes but does not have dysmorphic features. His full younger brother has similar features of primary microcephaly and seizures but is also described to have ptosis astigmatism nystagmus epicanthal folds posterior parietal hair whorls a large incisor sm…	Full or partial overlap with indication for testing	SNV	KIF11	10	94366474	94366474	c.308+1G>A		Heterozygous	splice_donor_variant	paternal	Microcephaly with or without chorioretinopathy lymphedema or intellectual disability (MCLID)	DOMINANT	Variant of Uncertain Significance
00190	HIC	Male	POSITIVE	global developmental delay intellectual disability macrocephaly a history of complex partial epilepsy gray matter heterotopia bilateral pes planovalgus bilateral hamstring contractures behavioral concerns and sensory sensitivities with a question of an autism spectrum disorder. Other reported phenotypes include dysmorphic features single palmar crease multiple lentigines cafe au lait spot high fr…	Full or partial overlap with indication for testing	SNV	BRAF	7	140501287	140501287	c.785A>G	Gln262Arg	Heterozygous	missense_variant	de novo	BRAF-Related Spectrum Disorder	DOMINANT	Pathogenic
00186	HIC	Male	NEGATIVE	severe global developmental delay speech delay and autism spectrum disorder. He is described to be big for his age tall and macrocephalic.
00189	HIC	Male	NEGATIVE	a history of developmental delay bilateral cleft lip and palate bilateral multicystics dysplastic kidneys facial and cranial asymmetry conductive hearing loss right lid coloboma ventral septal defect square face with midface hypoplasia low-set and posteriorly-rotated dysplastic and assymetric ears bilateral preauricular pits hypertelorism with ptosis short philtrum narrow high-arched palate with …
00165	HIC	Male	POSITIVE	a history of intrauterine growth restriction birth at 36 weeks gestational age due to premature rupture or membranes mild hypotonia since birth frequent respiratory infections severe global developmental delay and progressive microcephaly. Dysmorphic features include large palpebral fissures bilateral epicanthal folds downslanting of the eyes large and arched eyebrows micrognathia a tented upper …	Incidental Finding	SNV	F2	11	46761055	46761055	c.*97G>A		Heterozygous	3_prime_UTR_variant	paternal	Prothrombin-Related Thrombophilia	DOMINANT	Pathogenic
00165	HIC	Male	POSITIVE	a history of intrauterine growth restriction birth at 36 weeks gestational age due to premature rupture or membranes mild hypotonia since birth frequent respiratory infections severe global developmental delay and progressive microcephaly. Dysmorphic features include large palpebral fissures bilateral epicanthal folds downslanting of the eyes large and arched eyebrows micrognathia a tented upper …	Full or partial overlap with indication for testing	SNV	DYRK1A	21	38862599	38862599	c.787C>T	Arg263Ter	Heterozygous	stop_gained	de novo	DYRK1A-Related Intellectual Disability Syndrome	DOMINANT	Pathogenic
00155	HIC	Male	POSITIVE	intellectual disability epilepsy diagnosed at age 7 mild hypotonia easy fatigue and mild ataxia with reports of a non-diagnostic brain MRI. Bilateral camptodactytly of the fingers and toes syndactyly of fingers 2 and 3 and limited elbow extension and knee flexion are also noted. He has bilateral cryptorchidism large hypochromic patches on his right shoulder and back 2 hypochromic macules on his a…	Full or partial overlap with indication for testing	SNV	PACS1	11	65978677	65978677	c.607C>T	Arg203Trp	Heterozygous	missense_variant	de novo	PACS1-Related Syndrome	DOMINANT	Pathogenic
00155	HIC	Male	POSITIVE	intellectual disability epilepsy diagnosed at age 7 mild hypotonia easy fatigue and mild ataxia with reports of a non-diagnostic brain MRI. Bilateral camptodactytly of the fingers and toes syndactyly of fingers 2 and 3 and limited elbow extension and knee flexion are also noted. He has bilateral cryptorchidism large hypochromic patches on his right shoulder and back 2 hypochromic macules on his a…	Full or partial overlap with indication for testing	SNV	PRKCG	19	54393273	54393273	c.529+2T>C		Heterozygous	splice_donor_variant	de novo	Spinocerebellar Ataxia Dominant	DOMINANT	Variant of Uncertain Significance
00108	HIC	Male	POSITIVE	global developmental delays sensorineual hearing loss small stature and failure to thrive renal anomalies including a right duplicated collecting system and mild hydronephrosis cardiac anomalies including coarctation of the aorta and a ventricular septal defect dysphagia facial differences including shallow orbits with prominent eyes low-set and posteriorly rotated ears with folded superior auric…	Full or partial overlap with indication for testing	SNV	KMT2D	12	49426682	49426682	c.11806C>T	Gln3936Ter	Heterozygous	stop_gained	de novo	Kabuki Syndrome - KMT2D	DOMINANT	Pathogenic
00104	HIC	Male	NEGATIVE	extreme obesity diabetes mellitus some dysmorphic features such as anteriorly placed earlobes and palpebral fissures acanthosis nigricans gynecomastia and intellectual disability.
00163	HIC	Male	NEGATIVE	bilateral eyelid colobomas severe microtia conductive hearing loss facial and skull asymmetry with micrognathia cleft lip and palate situs inversus and spinal stenosis with diplegia and severe weakness in lower extremities. Multiple congenital anomalies were described to be most consistent with a severe form of Goldenhar syndrome.
00185	HIC	Female	POSITIVE	severe microcephaly failure to thrive right-sided sensorineural hearing loss and developmental delay specifically both motor and speech delay. She is also described the have muscle weakness and hypotonia as well as probable vision issues noting a possible malformation of the optic disc. Labs showed elevated creatine phosphokinase levels. Brain CT showed no evidence of craniosynostosis although br…	Full or partial overlap with indication for testing	deletion	CASK	X	41419082	41419083	c.1686delT	Ser562ArgfsTer56	Heterozygous	frameshift_variant	de novo	CASK-Related Disorders	X_LINKED	Pathogenic
00115	HIC	Male	NEGATIVE	severe neutropenia since birth recurrent cellulitis anemia and sickle cell trait. Updated phenotype was provided for reanalysis and includes pneumonia and hepatosplenomegaly.
00166	HIC	Female	POSITIVE	severe psychomotor delay and intellectual disability generalized epilepsy and dysmophic features including microcephaly high and narrow palate bilateral ptosis right hypoplastic first finger low-set externally rotated ears and flat feet. She cannot walk independently lacks language skills and has excessive drooling. A brain MRI showed hypoplasia of the corpus callosum and an arachnoid cyst.	Full or partial overlap with indication for testing	SNV	ASXL3	18	31323161	31323161	c.3349C>T	Arg1117Ter	Heterozygous	stop_gained	de novo	Bainbridge-Ropers Syndrome	DOMINANT	Pathogenic
00191	HIC	Female	NEGATIVE	a history of bilateral cataracts developmental delay axial hypotonia most prominently in the lower extremities and delayed brain myelination.
00147	HIC	Male	POSITIVE	the presence of complex partial seizures that began at the age of 16 months and white matter abnormalities including a thin corpus callosum and delayed myelination. The proband also presents with spastic diplegia which includes increased tone in the lower extremities and developmental delays including delayed speech and motor skills.	Full or partial overlap with indication for testing	SNV	TBCD	17	80878470	80878470	c.2077C>A	Pro693Thr	Heterozygous	missense_variant	maternal	Neurological Disorders	RECESSIVE	Variant of Uncertain Significance
00147	HIC	Male	POSITIVE	the presence of complex partial seizures that began at the age of 16 months and white matter abnormalities including a thin corpus callosum and delayed myelination. The proband also presents with spastic diplegia which includes increased tone in the lower extremities and developmental delays including delayed speech and motor skills.	Full or partial overlap with indication for testing	SNV	TBCD	17	80885060	80885060	c.2472-2A>G		Heterozygous	splice_acceptor_variant	paternal	Neurological Disorders	RECESSIVE	Likely Pathogenic
00151	HIC	Male	POSITIVE	developmental delay horizontal and pendular nystagmus loud and stridulous respirations laryngomalacia poor head control irritability sleep difficulties and an abnormal MRI consistent with hypomyelination and Chiari I malformation. Clinical differential includes Pelizaeus-Merzbacher disease.	Full or partial overlap with indication for testing	SNV	PLP1	X	103042880	103042880	c.607G>A	Asp203Asn	Hemizygous	missense_variant	maternal	Pelizaeus‚ÄìMerzbacher disease	X_LINKED	Pathogenic
00215	HIC	Female	POSITIVE	short-segment Hirschsprung disease global developmental delay gait abnormalities staring spells febrile seizures mild microcephaly subtle facial dysmorphia and a flattened facial profile small stature mild hirsuitism astigmatism and exotropia. Brain MRI is reported to be normal.	Full or partial overlap with indication for testing	SNV	ZEB2	2	145162532	145162532	c.463G>T	Glu155Ter	Heterozygous	stop_gained	de novo	Mowat-Wilson Syndrome	DOMINANT	Pathogenic
00212	HIC	Male	NEGATIVE	hypotonia dysphagia gastrointestinal dysmotility muscle pain and weakness exercise intolerance and developmental delay. He had a diaphragmatic hernia and laryngeal cleft that were repaired after birth. chronic fatigue gastroparesis constipation irregular voiding sialorrhea and malabsorption of glucose. Seizures were also reported but no medication was required. Irregular dentition (not otherwise …
00204	HIC	Male	POSITIVE	truncal hypotonia with hypertonia and scissoring of the extremities and severe delays in milestones including lack of speech no head control with marked head lag and inability to sit. Dysphagia failure to thrive and need for G-tube feeding are also noted. He presents with vision impairment including hyperopia esotropia and nystagmus has bilateral cryptorchidism hypermobile fingers and osteopenia.…	Full or partial overlap with indication for testing	SNV	SLC16A2	X	73744247	73744247	c.629C>A	Ser210Tyr	Hemizygous	missense_variant	maternal	Allan-Herndon-Dudley Syndrome	X_LINKED	Likely Pathogenic
00192	HIC	Female	NEGATIVE	uncontrolled hypertension rashes that evolve to desquamation ocular hypertension acute vision loss night blindness and yellow-discoloration of sight with black spots in vision. The patient was diagnosed with hypertension at age 14 and onset of rashes with headaches were at 15 years old. She has bilateral accessory bones in the tarsals of the feet. skin rashes and lesions that heal slowly and occu…
00184	HIC	Male	POSITIVE	a history of a thin corpus callosum psychomotor delay language delay microretrognathia sparse interrupted eyebrows and long and smooth philtrum.	Full or partial overlap with indication for testing	uniparental disomy		1							maternal	Uniparental disomy of chromosome 1			This individual has uniparental disomy (UPD) for all of chromosome 1 with areas of isodisomy interspersed with areas of heterodisomy inherited from their mother. A review of all variants on chromosome 1 failed to yield a causative variant for the patient's reported phenotype, and there are no known reported imprinted regions on chromosome 1. However, given the number of genes on chromosome 1 it i…
00205	HIC	Female	POSITIVE	developmental delays including motor and speech delay presence of microcephaly failure to thrive and truncal hypotonia. MRI imaging noted mild enlargement of the lateral ventricles and the cisterna magna.	Full or partial overlap with indication for testing	SNV	TUBB2B	6	3225907	3225907	c.416T>C	Leu139Pro	Heterozygous	missense_variant	de novo	TUBB2B-Related Tubulinopathy	DOMINANT	Likely Pathogenic
00159	HIC	Female	POSITIVE	a history of microcephaly thin corpus collosum bilateral congenital ptosis strabismus optic disk pallor bilateral hyperopia bilateral heel cord tightness congenital hypotonia chronic constipation exposure keratitis paroxysmal spells sleep myoclonus developmental delay and learning disabilities.	Full or partial overlap with indication for testing	SNV	TUBB2B	6	3225095	3225095	c.1228G>A	Glu410Lys	Heterozygous	missense_variant	de novo	TUBB2B-Related Tubulinopathy	DOMINANT	Likely Pathogenic
00202	HIC	Female	POSITIVE	developmental delay childhood-onset ataxia lower-extremity spasticity as well as slowly progressive dystonia dysmetria dysarthria and head titubation. She also has a history of anxiety cyclic vomiting and suspected scoliosis and hip dislocation. Brain imaging shows persistent hypomyelination with relative preservation of the lateral thalami and medial globus pallidi with profound brainstem hypomy…	Full or partial overlap with indication for testing	SNV	TUBB4A	19	6495714	6495714	c.796T>A	Phe266Ile	Heterozygous	missense_variant	de novo	TUBB4A-Related Leukodystophy	DOMINANT	Likely Pathogenic
00198	HIC	Male	NEGATIVE	Non-dysmorphic early-onset progressive ataxia dysarthria limited upward gaze global developmental delays hypotonia behavioral difficulties including irritability and attention deficits bilateral sensorineural hearing loss gastroesophageal reflux constipation and a history of neonatal hypoglycemia and polycythemia. Brain imaging shows progressive cerebellar atrophy primarily involving the cerebell…
00164	HIC	Male	NEGATIVE	severe prenatal and postnatal microcephaly with simplified gyral pattern on MRI intellectual disability height and weight consistently below the third percentile talipes equinovarus bilateral cryptorchidism salt and pepper retinopathy prominent nose multiple cafe au lait spots and multiple hypopigmented spots.
00197	HIC	Male	POSITIVE	severe intellectual disabilty developmental delay microcephaly seizures growth delay and absence of speech. The proband also presents with dysmorphic features including micrognathia a bulbous nasal tip bilateral 5th finger clinodactyly and a single palmar crease and past medical history includes asthma autism resolved congenital atrial septal defect and resolved congenital hydronephrosis. Additio…	Full or partial overlap with indication for testing	SNV	DYRK1A	21	38862503	38862503	c.691C>T	Arg231Ter	Heterozygous	stop_gained	unknown	DYRK1A-Related Intellectual Disability Syndrome	DOMINANT	Pathogenic
00193	HIC	Male	NEGATIVE	a blue rubber bleb nevus history of a vascular tumor multiple venous malformations poor dentition heart murmur bilateral headache.
00218	HIC	Female	See Below (Inconclusive)	Delayed motor development increasing fatigue lordosis and scapular winging lack of core strength hypotonia fractures chronic constipation persistent mild normocytic anemia with occasional neutropenia and carnitine deficiency. Previous mitochondrial muscle testing was suggestive of a mitochondrial depletion syndrome.	Full or partial overlap with indication for testing	SNV	KDM1A	1	23384061	23384061	c.1072+3A>G		Heterozygous	splice_region_variant; intron_variant	de novo	Disease Association NOS	DOMINANT	Variant of Uncertain Significance
00187	HIC	Male	NEGATIVE	meningomyelocele hydrocephalus Chiari II malformation neural tube defect and radiographic findings of Luckenschadel skull low metopic sutur widening of the fontanelles and major intracranial sutures. Also noted was mild-moderate aortic root dilation.
00211	HIC	Female	NEGATIVE	prenatal growth restriction microcephaly speech and language delays mild intellectual disability high functioning autism attention deficit disorder hypotonia mild symmetrical bilateral hyperreflexia of the lower extremities generalized ligamentous laxity pectus excavatum right sided 2-3 toe syndactyly feet deviated outward deviated nasal septum prominent columella left esotropia and many dental c…
00199	HIC	Male	NEGATIVE	cognitive impairment macrocrania macrosomia ocular apraxia dysarthria fine tremor neurological picture characteristic of bradykinetic parkisonian syndrome and multiple lesions detected by MRI with regression subsequent regression atrophy and recurrence.
00231	LMIC	Male	POSITIVE	bilateral microtia without auditory canals a bulging philtrum with flat vascular malformation micrognathia mid alveolar ridge severe alveolar hypertrophy hypotonic tongue multiple pits in the elbows and knees and deep palmar grooves. He also presents with hypotonia and motor delay and a renal ultrasound showed pelviectasis.	Full or partial overlap with indication for testing	SNV	TAOK1				c.557C>T	p.Pro186Leu	Heterozygous	missense	de novo	TAOK1-related neurodevelopmentaldisorder	DOMINANT	Likely Pathogenic
00239	LMIC	Female	POSITIVE	hydronephrosis bilateral hip dysplasia intellectual disability septal hypertrophy and cardiomyopathy expressive language delay coarse facies including a broad coarse nose thick lips pit on the right ear lobe maxillary hypoplasia and thick curly hair. In addition the patient has thick knuckles with hypoplastic distal phalanges with small nails and redundant and loose skin on hands.	Full or partial overlap with indication for testing	SNV	HRAS	11	534289	534289	c.34G>A	Gly12Ser	Heterozygous	missense_variant	de novo	Costello syndrome	DOMINANT	Pathogenic
00236	LMIC	Male	POSITIVE	developmental delay bilateral club feet residual metatarsus adductus inguinal and umbilical hernias aplasia cutis congenita and spina bifida occulta. Dysmorphic features were also noted including downslanting palpebral fissures periorbital puffiness prominent antihelix of both ears small mouth with thin upper lip and full lower lip long fingers and small patellas which are dislocated to the left.	Full or partial overlap with indication for testing	copy_number_variation		5	124864529	134720575	1	5q23.2-q31.1	Heterozygous	9.86 Mb	de novo	Disease Association NOS	DOMINANT	Pathogenic
00225	LMIC	Female	POSITIVE	epilepsy that began at 6 months of age severe hypertonia of her upper and lower limbs and axial hypotonia. She also has feeding difficulties and severe constipation. Her dysmorphic features include a flat supraorbital ridge short sternum an adducted and very short thumb severe clinodactyly of the second fingers and second toes prominent finger syndactyly on both hands and absence of distal crease…	Full or partial overlap with indication for testing	SNV	CACNA1G	17	48685266	48685266	c.4591A>G	Met1531Val	Heterozygous	missense_variant	de novo	CACNA1G-related disorders	DOMINANT	Likely Pathogenic
00233	LMIC	Male	POSITIVE	Striking ataxia epilepsy and regression of speech and motor ability with onset around 3 years of age	Full or partial overlap with indication for testing	SNV	TPP1	11	6638858	6638858	c.379C>T	Arg127Ter	Heterozygous	stop_gained; splice_region_variant	maternal	CLN2 Disease	RECESSIVE	Pathogenic
00233	LMIC	Male	POSITIVE	Striking ataxia epilepsy and regression of speech and motor ability with onset around 3 years of age	Full or partial overlap with indication for testing	insertion	TPP1	11	6636151	6636151	c.1496dupC	Leu500SerfsTer18	Heterozygous	frameshift_variant	paternal	CLN2 Disease	RECESSIVE	Pathogenic
00234	LMIC	Male	POSITIVE	developmental delay intellectual disability recurrent infections cryptorchidism mild hearing loss anxiety and mild autistic behavior. He is also noted to have downslanting palpebral fissures crowded teeth micrognathia and his second toe overlaps the first toe on both feet.	Full or partial overlap with indication for testing	copy_number_variation		1	155709113	159191078	3	1q22-q23.2	Heterozygous	3.48 Mb	unknown (not detected in mother)	Disease Association NOS	DOMINANT	Likely Pathogenic
00116	HIC	Male	POSITIVE	albinism vision impairment attention deficit hyperactivity and autism.	Full or partial overlap with indication for testing	SNV	SLC45A2	5	33964078	33964078	c.606G>C	Trp202Cys	Heterozygous	missense_variant	paternal	Oculocutaneous Albinism	RECESSIVE	Likely Pathogenic
00116	HIC	Male	POSITIVE	albinism vision impairment attention deficit hyperactivity and autism.	Full or partial overlap with indication for testing	SNV	SLC45A2	5	33947370	33947370	c.1266C>G	Tyr422Ter	Heterozygous	stop_gained	maternal	Oculocutaneous Albinism	RECESSIVE	Pathogenic
00226	LMIC	Male	See Below (Inconclusive)	a history of feeding difficulties global developmental delays and behavioral issues including hyperactivity and aggression.	Full or partial overlap with indication for testing	deletion	EP300	22	41527637	41527645	c.1528+3_1528+10delAAGTTTGT		Heterozygous	splice_donor_variant; intron_variant	de novo	Rubinstein-Taybi Syndrome	DOMINANT	Variant of Uncertain Significance
00228	LMIC	Male	POSITIVE	The intellectual disability developmental delay growth delay and mild microcephaly. Dysmorphic facial features include left esotropia small ears smooth philtrum and thin upper lip vermilion and a nasal columella that hangs below the alae. The proband also presents with a low hair line short neck decrease elbow mobility prominent fetal pads and constipation. Apnea and an undescended testis were no…	Full or partial overlap with indication for testing	SNV	KMT2A	11	118344908	118344908	c.3034C>T	Gln1012Ter	Heterozygous	stop_gained	de novo	Wiedemann-Steiner Syndrome	DOMINANT	Pathogenic
00229	LMIC	Male	POSITIVE	an atrial septal defect prominent fetal pads long fingers multiple ear tags bilateral ear pits low hairline microcephaly intellectual disability and is non-ambulatory and non-verbal.	Full or partial overlap with indication for testing	copy_number_variation		22	16849364	20311389	3	22q11.1-q11.21	Heterozygous	3.5 Mb	de novo	Emanuel Syndrome	DOMINANT	Pathogenic
00229	LMIC	Male	POSITIVE	an atrial septal defect prominent fetal pads long fingers multiple ear tags bilateral ear pits low hairline microcephaly intellectual disability and is non-ambulatory and non-verbal.	Full or partial overlap with indication for testing	copy_number_variation		11	116684536	134945187	3	11q23.3-qter	Heterozygous	18.3 Mb	de novo	Emanuel Syndrome	DOMINANT	Pathogenic
00223	HIC	Female	POSITIVE	developmental regression axial hypotonia with appendicular hypertonia feeding difficulties poor visual tracking possible seizures and hearing loss and brain MRI showing volume loss hypomyelination and a thin corpus callosum.	Full or partial overlap with indication for testing	SNV	PPT1	1	40557070	40557070	c.364A>T	Arg122Trp	Heterozygous	missense_variant; splice_region_variant	maternal	CLN1 Disease	RECESSIVE	Pathogenic
00223	HIC	Female	POSITIVE	developmental regression axial hypotonia with appendicular hypertonia feeding difficulties poor visual tracking possible seizures and hearing loss and brain MRI showing volume loss hypomyelination and a thin corpus callosum.	Full or partial overlap with indication for testing	SNV	PPT1	1	40555167	40555167	c.451C>T	Arg151Ter	Heterozygous	stop_gained	paternal	CLN1 Disease	RECESSIVE	Pathogenic
00188	HIC	Male	POSITIVE	prenatally detected growth restriction global developmental delays epilepsy vision loss and mild transaminitis. Cerebrospinal fluid neurotransmitter studies showed low hydroxyindoleacetic acid and homovanillic acid and metabolomic profile screening showed increased 7-methylguanosine and 3-methoxytyrosine.	Full or partial overlap with indication for testing	deletion	CDKL5				c.2761_2762delCA	Thr921ArgfsTer7	Heterozygous	frameshift_variant	de novo	CDKL5 deficiency disorder	DOMINANT	Likely Pathogenic
00232	LMIC	Male	POSITIVE	psychomotor delay a low anterior hairline minor plagiocephaly broad nasal tip shawl scrotum mild 5th finger clinodactyly inappropriate laughter a wide-based gait and delayed speech.	Full or partial overlap with indication for testing	SNV	NAA15	4	140262203	140262203	c.382C>T	Arg128Ter	Heterozygous	stop_gained	de novo	Intellectual Disability	DOMINANT	Pathogenic
00227	LMIC	Female	POSITIVE	severe growth deficiency epilepsy developmental delay including cognitive deficiency and lack of speech and behavioral issues including autism and self-injurious tendencies. She has not developed secondary sexual characteristics and a dysmorphology exam noted coarse facies long tapered fingers thick lips and over-folded ears. She is described to have a broad-based duck-footed gait. Lactose intole…	Incidental Finding	SNV	CHEK2	22	29121326	29121326	c.349A>G	Arg117Gly	Heterozygous	missense_variant	maternal	CHEK2-Related Cancer Susceptibility	DOMINANT	Likely Pathogenic
00227	LMIC	Female	POSITIVE	severe growth deficiency epilepsy developmental delay including cognitive deficiency and lack of speech and behavioral issues including autism and self-injurious tendencies. She has not developed secondary sexual characteristics and a dysmorphology exam noted coarse facies long tapered fingers thick lips and over-folded ears. She is described to have a broad-based duck-footed gait. Lactose intole…	Full or partial overlap with indication for testing	SNV	KISS1R	19	917735	917735	c.233A>G	Asn78Ser	Homozygous	missense_variant	maternal	Isolated GnRH Deficiency	RECESSIVE	Variant of Uncertain Significance
00227	LMIC	Female	POSITIVE	severe growth deficiency epilepsy developmental delay including cognitive deficiency and lack of speech and behavioral issues including autism and self-injurious tendencies. She has not developed secondary sexual characteristics and a dysmorphology exam noted coarse facies long tapered fingers thick lips and over-folded ears. She is described to have a broad-based duck-footed gait. Lactose intole…	Full or partial overlap with indication for testing	SNV	SCN2A	2	166152557	166152557	c.224C>G	Ser75Ter	Heterozygous	stop_gained	de novo	SCN2A-related seizure disorders	DOMINANT	Pathogenic
00227	LMIC	Female	POSITIVE	severe growth deficiency epilepsy developmental delay including cognitive deficiency and lack of speech and behavioral issues including autism and self-injurious tendencies. She has not developed secondary sexual characteristics and a dysmorphology exam noted coarse facies long tapered fingers thick lips and over-folded ears. She is described to have a broad-based duck-footed gait. Lactose intole…	Full or partial overlap with indication for testing	uniparental disomy		11			2	11p	Heterozygous	47 Mb		Uniparental disomy of chromosome 11 (11p)			It appears that the proband has an anomaly suggestive of uniparental disomy (UPD) of most of the short arm of chromosome 11 (11p) spanning ~47 Mb. However, this is outside of the formal test definition of this test, and therefore, cannot be confirmed. Further confirmatory testing may be warranted.
00227	LMIC	Female	POSITIVE	severe growth deficiency epilepsy developmental delay including cognitive deficiency and lack of speech and behavioral issues including autism and self-injurious tendencies. She has not developed secondary sexual characteristics and a dysmorphology exam noted coarse facies long tapered fingers thick lips and over-folded ears. She is described to have a broad-based duck-footed gait. Lactose intole…	Full or partial overlap with indication for testing	copy_number_variation		19	916637	1275315	1	19p13.3	Heterozygous	358.7 kb	de novo	Multiple conditions including Isolated GnRH Deficiency and PeutzJehgers syndrome	DOMINANT	Pathogenic
00224	HIC	Male	NEGATIVE	refractory epilepsy intellectual disability speech delay mixed cerebral palsy motor delay issues with tone severe scoliosis hypothyroidism osteoporosis chronic bronchial syndrome and a secondary sleep disorder. He has had abnormal MRI findings which include frontal lobe atrophy and cavum septum pellucidum.
00217	HIC	Female	NEGATIVE	tethered spinal cord and syringomyelia. Failure to thrive was present at 6 months followed by developmental delay and regression of motor and potty training skills at 3 years. At 7 years she continues to have motor delays bladder dysfunction learning difficulties ADHD and dyslexia. She also has a preauricular tag a low BMI and fine sparse hair.
00230	LMIC	Male	POSITIVE	developmental delay intellectual disability with expressive speech delay involving regression and short stature. Notable features include high nasal bridge with bulbous tip and columella well below the level of the nasal alae. An irregular heart beat with no murmur left eye that intermittently deviates upward and right undescended testicle are also mentioned. He is described to have a friendly de…	Full or partial overlap with indication for testing	insertion	KDM5C	X	53223352	53223352	c.4006dupC	Leu1336ProfsTer11	Hemizygous	frameshift_variant	de novo	Intellectual Disability X-linked	X_LINKED	Likely Pathogenic
00240	LMIC	Female	See Below (Inconclusive)	developmental delay with speech delay postnatal growth deficiency microcephaly genital abnormality with an anorectal malformation and a bifid distal phalanx of the left second toe with small nails. She is described to have dymorphic features including a very low frontal hair line with a widow's peak possible synophrys hirsutism esotropia short palpebral fissures strabismus anteverted nose long sm…	Full or partial overlap with indication for testing	SNV	VPS13B	8	100493971	100493971	c.3811A>T	Thr1271Ser	Heterozygous	missense_variant	paternal	Cohen Syndrome	RECESSIVE	Variant of Uncertain Significance
00240	LMIC	Female	See Below (Inconclusive)	developmental delay with speech delay postnatal growth deficiency microcephaly genital abnormality with an anorectal malformation and a bifid distal phalanx of the left second toe with small nails. She is described to have dymorphic features including a very low frontal hair line with a widow's peak possible synophrys hirsutism esotropia short palpebral fissures strabismus anteverted nose long sm…	Full or partial overlap with indication for testing	SNV	VPS13B	8	100791192	100791192	c.7787C>T	Ser2596Phe	Heterozygous	missense_variant	paternal	Cohen Syndrome	RECESSIVE	Variant of Uncertain Significance
00240	LMIC	Female	See Below (Inconclusive)	developmental delay with speech delay postnatal growth deficiency microcephaly genital abnormality with an anorectal malformation and a bifid distal phalanx of the left second toe with small nails. She is described to have dymorphic features including a very low frontal hair line with a widow's peak possible synophrys hirsutism esotropia short palpebral fissures strabismus anteverted nose long sm…	Full or partial overlap with indication for testing	SNV	VPS13B	8	100493927	100493927	c.3767T>G	Met1256Arg	Heterozygous	missense_variant	maternal	Cohen Syndrome	RECESSIVE	Variant of Uncertain Significance
00256	HIC	Female	POSITIVE	postural orthostatic tachycardia syndrome (POTS) dizziness fatigue brain fog headaches nasuea diarrhea constipation early satiety abdominal pain partial idiopathic epilepsy attention deficit disorder and hyptonia. She is also reported to have joint laxity with possible Ehlers Danlos syndrome a Marfanoid habitus height 99 percentile and mitral valve prolapse.	Full or partial overlap with indication for testing	SNV	SCN9A	2	167056184	167056184	c.4932G>T	Met1644Ile	Heterozygous	missense_variant	paternal	SCN9A-Related Disorders	DOMINANT	Variant of Uncertain Significance
00256	HIC	Female	POSITIVE	postural orthostatic tachycardia syndrome (POTS) dizziness fatigue brain fog headaches nasuea diarrhea constipation early satiety abdominal pain partial idiopathic epilepsy attention deficit disorder and hyptonia. She is also reported to have joint laxity with possible Ehlers Danlos syndrome a Marfanoid habitus height 99 percentile and mitral valve prolapse.	Full or partial overlap with indication for testing	SNV	FBN1	15	48760203	48760203	c.4679C>T	Ala1560Val	Heterozygous	missense_variant	paternal	Marfan Syndrome	DOMINANT	Likely Pathogenic
00210	HIC	Male	POSITIVE	macrocephaly hydrocephalus Dandy-Walker malformation hypotonia congenital cardiac malformations epilepsy facial dysmorphism skeletal differences including vertebral anomalies feeding and respiratory distress and global developmental delays.	Full or partial overlap with indication for testing	SNV	PIK3CA	3	178921548	178921548	c.1030G>A	Val344Met	Heterozygous	missense_variant	de novo	Megalencephaly-capillary malformation	DOMINANT	Likely Pathogenic
00210	HIC	Male	POSITIVE	macrocephaly hydrocephalus Dandy-Walker malformation hypotonia congenital cardiac malformations epilepsy facial dysmorphism skeletal differences including vertebral anomalies feeding and respiratory distress and global developmental delays.	Full or partial overlap with indication for testing	SNV	BGN	X	152770285	152770285	c.196G>A	Gly66Ser	Hemizygous	missense_variant	maternal	BGN-related disorders	X_LINKED	Variant of Uncertain Significance
00206	HIC	Male	NEGATIVE	history of failure to thrive developmental delay cleft lip and palate pulmonary insufficiency microphallus esophagitis chronic colitis ileitis easy bruising pancreatic insufficiency with possible pancreatic agenesis hydromelia proximal phalanx hypoplasia and left radial hypoplasia. Congenital heart disease is described (s/p pacemaker placement) including a ventricular septal defect endocardial cu…
00207	HIC	Female	POSITIVE	developmental delay language delay aggressive behavior hirsutism short stature and dysmorphic facies including asymmetry and malar hypoplasia a large nose with bulbous tip and a thin upper vermilion with a flat philtrum. Additional features include posteriorly rotated ears a left ear pit broad fingers and mild syndactyly of the second and third toes on both feet. She is also noted to have spinal …	Full or partial overlap with indication for testing	SNV	KMT2A	11	118373223	118373223	c.6616C>T	Gln2206Ter	Heterozygous	stop_gained	de novo	Wiedemann-Steiner Syndrome	DOMINANT	Pathogenic
00201	HIC	Female	NEGATIVE	symptoms of a neurological condition and a personal and family history of early-onset cancers. Gait abnormalities are noted and described as leg stiffness and heaviness with left-sided weakness and toe-walking causing instability. She has weak ankle dorsiflexion positive Hoffman's signs bilaterally and increased tone in all limbs with a negative connective tissue work-up. Osteoporosis is mentione…
00194	HIC	Female	See Below (Inconclusive)	a clinical diagnosis of ornithine transcarbamylase (OTC) deficiency poor growth and difficulty gaining weight persistent lactic acidosis anemia hypoglycemia renal proximal tubular dysfunction and concern for a congenital diarrheal or mitochondrial disorder.	Full or partial overlap with indication for testing	SNV	PCSK1	5	95759036	95759036	c.524C>T	Thr175Met	Heterozygous	missense_variant	paternal	Proprotein Convertase-1 Deficiency	RECESSIVE	Variant of Uncertain Significance
00196	HIC	Male	NEGATIVE	premature birth at 30 week horseshoe kidney vocal cord paresis bronchomalacia laryngeal cleft bilateral hip dislocation rhizomelic shortening of the extremities short stature cavum septum pellucidum and cavum vergae diffuse corpus callosum thinning cardiac abnormalities vertebral anomalies eleven ribs elevated scapulae bone demineralization club feet diastasis recti umbilical and inguinal hernias…
00001	LMIC	Female	NEGATIVE	features of Russell-Silver syndrome. She presents with developmental delay and epilepsy with her first seizure noted at 3 months of age. She has severe pre- and post-natal growth delay hypothyroidism a triangular face frontal bossing syndactyly and 5th finger clinodactyly. Cortical atrophy and ventriculomegaly were noted on an MRI and bifrontal spikes were noted on an EEG. She also experienced ep…
00219	HIC	Female	NEGATIVE	a history of three primary cancers by the age of 15: left thalamic anaplastic oligoastrocytoma (4 yo) renal cell carcinoma unclassified type (10 yo) and thyroid papillary microcarcinoma follicular variant (15 yo). She is noted to also have cafe-au-lait spots at multiple locations on her body and mild hyperextensibility of her left elbow. Mild dysmorphic features are noted including mild dolichoce…
00260	HIC	Female	POSITIVE	microcephaly (less than the 3rd percentile) nystagmus poor visual engagement abnormal MRI including temporal lobe asymmetry enlarged Sylvian fissure and lateral ventricles white matter abnormalities and thin corpus callosum craniofacial dysmorphic features and clinodactyly of the 4th and 5th toes.	Incidental Finding	SNV	COL2A1	12	48374724	48374724	c.2491G>T	Gly831Ter	Heterozygous	stop_gained	de novo	COL2A1-Related Disorders	DOMINANT	Pathogenic
00260	HIC	Female	POSITIVE	microcephaly (less than the 3rd percentile) nystagmus poor visual engagement abnormal MRI including temporal lobe asymmetry enlarged Sylvian fissure and lateral ventricles white matter abnormalities and thin corpus callosum craniofacial dysmorphic features and clinodactyly of the 4th and 5th toes.	Full or partial overlap with indication for testing	SNV	DDX3X	X	41204778	41204778	c.1292T>G	Leu431Arg	Heterozygous	missense_variant	de novo	DDX3X-related X-linked intellectual disability	X_LINKED	Likely Pathogenic
00195	HIC	Female	POSITIVE	hypoglycemia secondary to congenital hyperinsulinism and diffuse pancreatic disease.	Full or partial overlap with indication for testing	SNV	ABCC8	11	17417465	17417465	c.4132G>A	Gly1378Ser	Heterozygous	missense_variant	paternal	Hyperinsulinism Dominant/Recessive	MIXED	Pathogenic
00222	HIC	Female	NEGATIVE	mild global develomental delay hypotonia ataxia short stature intermittent esotropia strabismus frequent ear infections and one noted seizure.
00209	HIC	Male	See Below (Inconclusive)	neurodevelopmental delay aortic root dilation aortic stenosis pulmonary stenosis pulmonary hypertension dysphagia nystagmus truncal hypotonia with hypertonicity of the extremeties and microcephaly. Dysmorphic features include hemifacial microsomia anteverted nares pectus excavatum and bilateral fifth finger clinodactyly. Chronic bilateral serous otitis media and head banging and stimming behavior…	Full or partial overlap with indication for testing	copy_number_variation		15	31950340	32515223	3	15q13.3	Heterozygous	564.88 kb	maternal	Disease Association NOS	DOMINANT	Uncertain Clinical Significance
00167	HIC	Female	POSITIVE	severe progressive muscular dystrophy; this diagnosis is supported by high CPK levels and muscle biopsy findings. Skin hyperkeratosis on the arms and forehead was also noted.	Full or partial overlap with indication for testing	SNV	COL6A3	2	238270382	238270382	c.6156G>A	Lys2052	Heterozygous	splice_region_variant; synonymous_variant	de novo	Collagen Type VI-Related Disorders	DOMINANT	Likely Pathogenic
00254	HIC	Female	POSITIVE	daily epistaxis and a history of pulmonary and small bowel arteriovenous malformations with a diagnosis of hereditary hemorrhagic telangiectasia inherited from her maternal lineage. In addition she has microcytic anemia joint hypermobility of bilateral 5th fingers and elbows progressive aortic regurgitation left ventricle dilation cyclic vomiting syndrome and chronic constipation.	Full or partial overlap with indication for testing	deletion	ENG	9	130588019	130588023	c.640_643delGGCC	Gly214ThrfsTer7	Heterozygous	frameshift_variant	maternal	Hereditary Hemorrhagic Telangiectasia	DOMINANT	Pathogenic
00266	HIC	Male	POSITIVE	developmental delay hypotonia reduced eye contact mild brachycephaly mild retromicrognathia bilateral protuberant pinnae bilateral fifth finger clinodactyly and nevus flammeus vascular birthmarks on the eyelids.	Full or partial overlap with indication for testing	SNV	NR2F1	5	92921039	92921039	c.310G>A	Glu104Lys	Heterozygous	missense_variant	de novo	Bosch-Boonstra-Schaaf Optic Atrophy Syndrome	DOMINANT	Likely Pathogenic
00238	LMIC	Male	POSITIVE	global developmental delay and autistic features including frequent tantrums and behaviors of rocking back and forth. Some dysmorphic features are noted including single hair whorl with frontal upsweep anteverted nose railroad track ears and mild shawl scrotum. His head circumference is noted to be in the 11th percentile upon examination at age 4.	Full or partial overlap with indication for testing	insertion	KIAA2022	X	73960933	73960933	c.3458dupA	Asn1153LysfsTer8	Hemizygous	frameshift_variant	de novo	KIAA2022-Related X-linked Intellectual Disability	X_LINKED	Pathogenic
00131	LMIC	Male	POSITIVE	microcephaly moderate to severe intellectual disability autism severe language delay and anxiety but is also described as very friendly and happy. The proband also has long thin extremities and his BMI is at the 2nd percentile. A cardiology evaluation noted the presence of a benign heart murmur. He also has full lips a large mouth a square-tipped nose and his hair has a single whorl.	Full or partial overlap with indication for testing	copy_number_variation		15	22749885	23281802	1	15q11.2	Heterozygous	531.92 kb	paternal	15q11.2 microdeletion syndrome	DOMINANT	Pathogenic
00243	LMIC	Male	POSITIVE	developmental delay oromotor dysfunction with cleft palate and dysmorphic features including right ptosis downslanting palpebral fissures low nasal bridge telecanthus smooth philtrum thin upper lip and fifth finger clinodactyly. There is a history of gestational diabetes and liver aneurysm noted on ultrasound. Hypotonia cutis marmorata unusual movement of upper limbs multiple respiratory infectio…	Full or partial overlap with indication for testing	SNV	PACS1	11	65978677	65978677	c.607C>T	Arg203Trp	Heterozygous	missense_variant	de novo	PACS1-Related Syndrome	DOMINANT	Pathogenic
00318	LMIC	Female	POSITIVE	bilateral congenital colobomatous microphthalmia.	Full or partial overlap with indication for testing	SNV	OTX2	14	57271029	57271029	c.150G>C	Arg50Ser	Heterozygous	missense_variant	paternal	OTX2-Related Syndromic Microphthalmia	DOMINANT	Likely Pathogenic
00220	HIC	Male	See Below (Inconclusive)	poor growth and multiple congential anomalies including holoprosencephaly cleft lip and palate craniofacial dysmorphia short neck with nuchal folds complex congenital heart disease small stomach large echogenic kidneys bilateral cryptorchidism anteriorly placed anus bilateral club feet and polysyndactyly of the hands and feet.	Full or partial overlap with indication for testing	SNV	IFT172	2	27708227	27708227	c.183G>C	Lys61Asn	Homozygous	missense_variant; splice_region_variant	both	IFT172-Related Ciliopathies	RECESSIVE	Variant of Uncertain Significance
00299	HIC	Male	NEGATIVE	autistic spectrum disorder speech regression and attention deficit disorder.
00244	LMIC	Male	POSITIVE	muscle weakness and a history of hip dysplasia. Additional features include disparate leg lengths broad forehead mild brachycephaly triangular face and flexible fingers.	Full or partial overlap with indication for testing	SNV	COL6A2	21	47536683	47536683	c.955-1G>T		Heterozygous	splice_acceptor_variant	de novo	Collagen Type VI-Related Disorders	DOMINANT	Likely Pathogenic
00169	LMIC	Male	POSITIVE	developmental delay with motor delay agenesis of the corpus callosum aqueductal stenosis hydrocephalus with ventriculoperitoneal shunt hypoplastic supraorbital ridges strabismus ptosis arched eyebrows protruding ears sloping forehead with a low anterior hairline brachycephaly camptodactyly abnormal creases 3-4 syndactyly of the right hand contractures spasticity shawl scrotum cryptorchidism hypos…	Full or partial overlap with indication for testing	SNV	TRAF7	16	2226351	2226351	c.1964G>A	Arg655Gln	Heterozygous	missense_variant	de novo	TRAF7-related syndrome	DOMINANT	Pathogenic
00169	LMIC	Male	POSITIVE	developmental delay with motor delay agenesis of the corpus callosum aqueductal stenosis hydrocephalus with ventriculoperitoneal shunt hypoplastic supraorbital ridges strabismus ptosis arched eyebrows protruding ears sloping forehead with a low anterior hairline brachycephaly camptodactyly abnormal creases 3-4 syndactyly of the right hand contractures spasticity shawl scrotum cryptorchidism hypos…	Full or partial overlap with indication for testing	copy_number_variation		22	18879656	19012096	0	22q11.21	Homozygous	132 kb	both	22q11.21 Deletion-Related Hyperprolinemia	RECESSIVE	Pathogenic
00248	HIC	Female	See Below (Inconclusive)	persistent swelling of hands and feet idiopathic lymphedema eczema presence of hyper and hypo-pigmentation mild pulmonary valve insufficiency headaches fatigue dyspnea dizziness thrombocytopenia and menstrual irregularities.	Full or partial overlap with indication for testing	copy_number_variation		16	89826718	89889835	1	16q24.3	Heterozygous	63 kb	maternal	Fanconi Anemia	RECESSIVE	Pathogenic
00319	LMIC	Female	NEGATIVE	generalized arthrogryposis with contracted elbows and hips torticollis camptodactyly with crease abnormalities club feet labial hypoplasia and a glabellar hemangioma.
00235	LMIC	Female	POSITIVE	progressive motor and cognitive decline dysphagia spasticity and seizures with onset before eight years of age.	Full or partial overlap with indication for testing	SNV	NPC1	18	21119790	21119790	c.2780C>T	Ala927Val	Heterozygous	missense_variant	unknown (not detected in mother)	Niemann-Pick Disease Type C1	RECESSIVE	Likely Pathogenic
00235	LMIC	Female	POSITIVE	progressive motor and cognitive decline dysphagia spasticity and seizures with onset before eight years of age.	Full or partial overlap with indication for testing	SNV	NPC1	18	21113316	21113316	c.3754+3A>C		Heterozygous	splice_region_variant; intron_variant	maternal	Niemann-Pick Disease Type C1	RECESSIVE	Variant of Uncertain Significance
00237	LMIC	Male	POSITIVE	a diagnosis of spastic quadriparesis/ cerebral palsy, developmental delay, growth deficiency with short stature, microcephaly, multiple skin nevi, and lower limb hypertonia. Disorganization was reported to be seen on EEG and delayed myelination was identified through brain MRI early in life. Dysmorphic features include arched eyebrows, strabismus, metopic ridge, plagiocephaly, prominent nasal bri…	Full or partial overlap with indication for testing	SNV	DDX3X	X	41205627	41205627	c.1461C>G	Phe487Leu	Hemizygous	missense_variant	de novo	DDX3X-related X-linked intellectual disability	X_LINKED	Likely Pathogenic
00237	LMIC	Male	POSITIVE	a diagnosis of spastic quadriparesis/ cerebral palsy, developmental delay, growth deficiency with short stature, microcephaly, multiple skin nevi, and lower limb hypertonia. Disorganization was reported to be seen on EEG and delayed myelination was identified through brain MRI early in life. Dysmorphic features include arched eyebrows, strabismus, metopic ridge, plagiocephaly, prominent nasal bri…	Full or partial overlap with indication for testing	copy_number_variation		2	1798393	2162086	3	2p25.3	Heterozygous	363.7 kb	maternal	Disease Association NOS	DOMINANT	Uncertain Clinical Significance
00241	LMIC	Female	NEGATIVE	failure to thrive and striking skin pigmentary changes with hyperpigmented and hypopigmented streaks following the line of Blashko consistent with hypomelanosis of Ito.
00301	LMIC	Male	POSITIVE	global developmental delays microcephaly small build right-sided microphthalmia and cataract shallow supraorbital ridges broad eyebrows mild midface hypoplasia fused lower incisors atrial septal defect undescended left testicle joint laxity reduced muscle bulk and abnormal gait.	Full or partial overlap with indication for testing	SNV	SOX2	3	181430290	181430290	c.142T>G	Phe48Val	Heterozygous	missense_variant	de novo	SOX2-related eye disorders	DOMINANT	Likely Pathogenic
00132	LMIC	Male	See Below (Inconclusive)	global developmental delay hyperactivity and some dysmorphic features including malar hyploplasia synophrys anteverted nares high ubilicus and shawl scrotum. Mild brain atrophy with increased subarachnoid space was noted on brain CT imaging.	Incidental Finding	insertion	CDKN2A	9	21974794	21974794	c.9_32dupGGCGGCGGGGAGCAGCATGGAGCC	Ala4_Pro11dup	Heterozygous	inframe_insertion	maternal	Melanoma-pancreatic cancer syndrome	DOMINANT	Pathogenic
00132	LMIC	Male	See Below (Inconclusive)	global developmental delay hyperactivity and some dysmorphic features including malar hyploplasia synophrys anteverted nares high ubilicus and shawl scrotum. Mild brain atrophy with increased subarachnoid space was noted on brain CT imaging.	Incidental Finding	SNV	VWF	12	6125802	6125802	c.5191T>A	Ser1731Thr	Heterozygous	missense_variant	maternal	von Willebrand Disease	DOMINANT	Likely Pathogenic
00132	LMIC	Male	See Below (Inconclusive)	global developmental delay hyperactivity and some dysmorphic features including malar hyploplasia synophrys anteverted nares high ubilicus and shawl scrotum. Mild brain atrophy with increased subarachnoid space was noted on brain CT imaging.	Full or partial overlap with indication for testing	copy_number_variation		9	140396737	140574545	1	9q34.3	Heterozygous	178 kb	de novo	Kleefstra Syndrome	DOMINANT	Uncertain Clinical Significance
00132	LMIC	Male	See Below (Inconclusive)	global developmental delay hyperactivity and some dysmorphic features including malar hyploplasia synophrys anteverted nares high ubilicus and shawl scrotum. Mild brain atrophy with increased subarachnoid space was noted on brain CT imaging.	Full or partial overlap with indication for testing	copy_number_variation		12	24560996	24596197	1	12p12.1	Heterozygous	35 kb	maternal	Lamb Shaffer syndrome	DOMINANT	Uncertain Clinical Significance
00300	LMIC	Female	See Below (Inconclusive)	developmental delay and epilepsy where seizures were first noticed at 2 months of age. Additional features include ataxia jerky or tremulous movements and head circumference under the 8th percentile. She is noted to be non-dysmorphic with medial eyebrow flare and malar flattening. There is a family history of possible inherited disease including icthyosis in the proband's father and two paternal …	Full or partial overlap with indication for testing	copy_number_variation		X	6451998	8136170	1	Xp22.31	Heterozygous	1.68 Mb	paternal	Xp22.31 deletion	X_LINKED	Pathogenic
00245	HIC	Male	POSITIVE	normal development during the first three months of life followed by rapidly progressive severe hypotonia respiratory failure seizures renal tubulopathy corneal opacity periorbital edema sensorineural deafness a bell-shaped thorax and high concentrations of spinal fluid proteins.	Full or partial overlap with indication for testing	SNV	RRM2B	8	103236352	103236352	c.472G>A	Ala158Thr	Heterozygous	missense_variant	paternal	RRM2B-Related Mitochondrial DNA Depletion Syndrome	RECESSIVE	Likely Pathogenic
00245	HIC	Male	POSITIVE	normal development during the first three months of life followed by rapidly progressive severe hypotonia respiratory failure seizures renal tubulopathy corneal opacity periorbital edema sensorineural deafness a bell-shaped thorax and high concentrations of spinal fluid proteins.	Full or partial overlap with indication for testing	SNV	RRM2B	8	103231145	103231145	c.581A>G	Glu194Gly	Heterozygous	missense_variant	maternal	RRM2B-Related Mitochondrial DNA Depletion Syndrome	RECESSIVE	Pathogenic
00262	HIC	Male	POSITIVE	high arched palate multiple dental caries synophrys thick eyelashes bilateral cataracts myopia strabismus laxity of earlobes a rasied pink lesion on the chest ecchymosis on his leg pes planus in-toeing when he walks clinodactyly of 4th and 5th toes bilaterally and joint hypermobility at the elbows thumbs fingers. He has a history of gallstones elevated liver enzymes pancreatitis and dilation of t…	Full or partial overlap with indication for testing	copy_number_variation		22	29977786	30006686	1	22q12.2	Heterozygous	29kb	de novo	Neurofibromatosis Type 2	DOMINANT	Uncertain Clinical Significance
00168	LMIC	Male	NEGATIVE	microcephaly club foot low-set ears weak cry bitemporal narrowing prominent metopic ridge depressed nasal tip strabismus microphthalmia short neck excess nuchal skin and cutis marmorata. Intrauterine growth restriction identified at 6 months gestation. An echocardiogram reportedly revealed small valves". "
00263	HIC	Female	POSITIVE	a history of pituitary adenoma bilateral vestibular schwannomas spinal dural ectasias polycsystic kidney disease scoliosis multiple calvarial spinal dysplasias anxiety depression and optic nerve atrophy.	Full or partial overlap with indication for testing	SNV	AIP	11	67258381	67258381	c.910C>T	Arg304Ter	Heterozygous	stop_gained	unknown	Familial Isolated Pituitary Adenomas	DOMINANT	Pathogenic
00263	HIC	Female	POSITIVE	a history of pituitary adenoma bilateral vestibular schwannomas spinal dural ectasias polycsystic kidney disease scoliosis multiple calvarial spinal dysplasias anxiety depression and optic nerve atrophy.	Full or partial overlap with indication for testing	insertion	PKD1	16	2158769	2158769	c.6398dupT	Val2134ArgfsTer41	Heterozygous	frameshift_variant	unknown	Polycystic Kidney Disease Autosomal Dominant	DOMINANT	Pathogenic
00258	HIC	Female	NEGATIVE	right facial palsy bilateral sensorineural hearing loss a left femur fracture dysmporphic features developmental delay an umbilical hernia gastroesophageal reflux torticollis and eczema. An abnormal vision exam was also noted.
00212	HIC	Male	POSITIVE	global development delays a suspected neuromotor demyelinating disorder with abnormal myelinization noted on MRI noisy breathing rotary nystagmus elevated liver function tests dimished deep tendon reflexes high arched palate thickening of the lumbar spine and deep melanosis in extensive areas of the body. He is nonverbal.	Full or partial overlap with indication for testing	SNV	SMPD1	11	6413052	6413052	c.757G>C	Asp253His	Homozygous	missense_variant	both	Acid Sphingomyelinase Deficiency	RECESSIVE	Likely Pathogenic
00250	HIC	Male	POSITIVE	global developmental delays and intellectual disability with regression of some skills in adolescence autism attention deficit hyperactivity disorder anxiety disorder hyperkinetic movements subtle dystonia macrocephaly craniofacial differences marfanoid gestalt gastroesophageal reflux constipation myopia astigmatism persistent unexplained low cholesterol and possible dementia.	Full or partial overlap with indication for testing	deletion	SHANK3	22	51160736	51160738	c.4441_4442delTG	Ter1481Ile	Heterozygous	frameshift_variant	de novo	Phelan-McDermid Syndrome	DOMINANT	Pathogenic
00264	HIC	Male	NEGATIVE	developmental delay a very high palate cardiac abnormalities (patent ductus arteriosus and atria septal defect) respiratory insufficiency and digestive problems.
00251	HIC	Female	See Below (Inconclusive)	seizures developmental delay bilateral sensorineural hearing loss and cortical visual impairment. Cardiac abnormalities (patent ductus arteriosus and ventricular septal defect) cyanotic spells respiratory insufficiency digestive problems and a high palate were also noted.	Full or partial overlap with indication for testing	copy_number_variation		1	1800954	2052629	3	1p36.33	Heterozygous	251.68 kb	paternal	Disease Association NOS	DOMINANT	Uncertain Clinical Significance
00212	HIC	Female	NEGATIVE	neurodevelopmental delay absent speech and autistic features.
00216	HIC	Male	POSITIVE	developmental delay hypotonia seizures cerebellar and vermis hypoplasia macrocephaly abnormal eye movements absent speech mild scoliosis and hyperextensible fingers.	Full or partial overlap with indication for testing	deletion	CACNA1A	19	13368250	13368253	c.4513_4515delTTT	Phe1505del	Heterozygous	inframe_deletion	de novo	CACNA1A-Related Disorders	DOMINANT	Pathogenic
00253	HIC	Female	POSITIVE	developmental delay intellectual disability epilepsy congenital hip dysplasia short stature ataxia and hypotonia. A brain MRI indicated likely atrophy of the cerebellar vermis and an EEG was consistent with seizures. She is also noted to have plagiocephaly a head circumference greater than the 95th percentile deep set eyes esotropia lateral nystagmus tight heel cords pes planus pronation of the f…	Full or partial overlap with indication for testing	SNV	CACNA1A	19	13372399	13372399	c.4118C>T	Ser1373Leu	Heterozygous	missense_variant	de novo	CACNA1A-Related Disorders	DOMINANT	Likely Pathogenic
00253	HIC	Female	POSITIVE	developmental delay intellectual disability epilepsy congenital hip dysplasia short stature ataxia and hypotonia. A brain MRI indicated likely atrophy of the cerebellar vermis and an EEG was consistent with seizures. She is also noted to have plagiocephaly a head circumference greater than the 95th percentile deep set eyes esotropia lateral nystagmus tight heel cords pes planus pronation of the f…	Incidental Finding	SNV	RNR1	MT	1555	1555	n.908A>G		Hemizygous	non_coding_transcript_exon_variant; non_coding_transcript_variant		RNR1-related hearing loss	MITOCHONDRIAL	Pathogenic
00259	HIC	Male	See Below (Inconclusive)	intellectual disability hypotonia mild joint laxity craniofacial dysmorphia hypermetropia congenital scoliosis with vertebral anomalies tethered cord pectus carinatum leg length asymmetry foot anomalies bilateral cryptorchidism unilateral inguinal hernia and enlarged subarachnoid spaces on cranial MRI.	Full or partial overlap with indication for testing	copy_number_variation		9			3	seq[GRCh37] (9)X3 mos?		aneuploidy	de novo	Trisomy 9 mosaic	unknown, presumed spontaneous	Pathogenic
00200	HIC	Male	See Below (Inconclusive)	microcephaly and hypotonia at birth developmental and motor delay absent speech progressive cerebellar atrophy and ataxia with spasticity and epilepsy. The proband has undergone severe neurodevelopmental regression since May 2015. He is also noted to have dysmorphic facial features a severe swallowing disorder an inability to move his legs no trunk head or sphincter control recurrent respiratory …	Full or partial overlap with indication for testing	SNV	SYP	X	49055475	49055475	c.54G>C	Gln18His	Hemizygous	missense_variant	maternal	Disease Association NOS	X_LINKED	Variant of Uncertain Significance
00265	HIC	Female	NEGATIVE	global developmental delay hypotonia mildly dysmorphic facial features ptosis esotropia erythematous skin cutis marmorata acrocyanosis gluten and dairy sensitivities enlarged tonsils dysplastic toenails inverted nipples and elevated BMI. Periventricular leukomalacia was also noted on brain MRI.
00257	HIC	Female	See Below (Inconclusive)	complex medical history that includes suspicion of a primary connective tissue disorder including clinical features of hypermobility pectus excavatum joint subluxation soft doughy skin and easy bruising. Additional features include hypertelorism long palpebral fissures bilateral mixed conductive and sensorineural hearing loss myoclonic disorder dysautonomia dizziness fatigue obstructive sleep apn…	Full or partial overlap with indication for testing	SNV	KCNH2	7	150655537	150655537	c.526C>T	Arg176Trp	Heterozygous	missense_variant	paternal	Long QT Syndrome	DOMINANT	Variant of Uncertain Significance
00242	LMIC	Male	POSITIVE	small stature microcephaly global developmental delays pectus excavatum umbilical hernia hearing loss small palpebral fissures bulbous nose with broad columella and tip facial capillary malformation and prominent fingertip pads.	Full or partial overlap with indication for testing	SNV	SLC17A8	12	100813704	100813704	c.1537G>A	Glu513Lys	Heterozygous	missense_variant	unknown	Nonsyndromic Hearing Loss Dominant	DOMINANT	Variant of Uncertain Significance
00242	LMIC	Male	POSITIVE	small stature microcephaly global developmental delays pectus excavatum umbilical hernia hearing loss small palpebral fissures bulbous nose with broad columella and tip facial capillary malformation and prominent fingertip pads.	Full or partial overlap with indication for testing	copy_number_variation		22	18888685	21465668	1	22q11.21	Heterozygous	258 Mb	unknown	22q11.2 Deletion Syndrome	DOMINANT	Pathogenic
00321	HIC	Male	See Below (Inconclusive)	history of congenital CMV infection and a suspected metabolic myopathy neuropathy or muscular dystrophy. His features include static encephalopathy global developmental delays motor regression progressive weakness which worsens during periods of illness sensorineural hearing loss elevated CK cone dystrophy nystagmus gastroesophageal reflux constipation and unexplained cyclic vomiting. He has a yo…	Full or partial overlap with indication for testing	SNV	PRPS1	X	106890958	106890958	c.827C>T	Pro276Leu	Hemizygous	missense_variant	maternal	PRPS1-Related Disorders	X_LINKED	Variant of Uncertain Significance
00285	HIC	Male	POSITIVE	developmental and motor delay truncal hypotonia lower extremity hypertonia cortical visual impairment constipation retrognathia fifth finger clinodactyly and a hemangioma on the scalp.	Full or partial overlap with indication for testing	deletion	KAT6A	8	41791909	41791914	c.3824_3828delAGAAG	Glu1275AlafsTer36	Heterozygous	frameshift_variant	de novo	KAT6A Syndrome	DOMINANT	Pathogenic
00324	HIC	Female	See Below (Inconclusive)	global developmental delays moderate intellectual disability macrocephaly hypotonia clinically suspected seizures delayed speech facial dysmorphisms hypermetropia astigmatism optic nerve edema mild hearing loss history of recurrent ear infections deviated nasal septum dental caries hypoplastic nipples and abnormal EKG with further work up pending.	Full or partial overlap with indication for testing	SNV	HUWE1	X	53576455	53576455	c.9500G>A	Ser3167Asn	Heterozygous	missense_variant	maternal	X-Linked Syndromic Intellectual Disability Turner Type	X_LINKED	Variant of Uncertain Significance
00324	HIC	Female	See Below (Inconclusive)	global developmental delays moderate intellectual disability macrocephaly hypotonia clinically suspected seizures delayed speech facial dysmorphisms hypermetropia astigmatism optic nerve edema mild hearing loss history of recurrent ear infections deviated nasal septum dental caries hypoplastic nipples and abnormal EKG with further work up pending.	Full or partial overlap with indication for testing	SNV	SZT2	1	43898806	43898806	c.5578T>G	Phe1860Val	Heterozygous	missense_variant	unknown (not detected in mother)	SZT2-Related Early Infantile Epileptic Encephalopathy	RECESSIVE	Variant of Uncertain Significance
00324	HIC	Female	See Below (Inconclusive)	global developmental delays moderate intellectual disability macrocephaly hypotonia clinically suspected seizures delayed speech facial dysmorphisms hypermetropia astigmatism optic nerve edema mild hearing loss history of recurrent ear infections deviated nasal septum dental caries hypoplastic nipples and abnormal EKG with further work up pending.	Full or partial overlap with indication for testing	deletion	SZT2	1	43896383	43896384	c.4528delC	Leu1510CysfsTer43	Heterozygous	frameshift_variant	maternal	SZT2-Related Early Infantile Epileptic Encephalopathy	RECESSIVE	Likely Pathogenic
00255	HIC	Female	See Below (Inconclusive)	This proband and her twin sister are reported to be affected with a similar clinical phenotype that includes global developmental delay intellectual disability autism spectrum disorder and are both nonverbal.	Full or partial overlap with indication for testing	SNV	PRSS12	4	119234410	119234410	c.1435G>A	Glu479Lys	Homozygous	missense_variant	both	Disease Association NOS	RECESSIVE	Variant of Uncertain Significance
00330	HIC	Male	See Below (Inconclusive)	dysplastic liver nodules and hepatic macronodular cirrhosis ascites splenomegaly and ptosis of the left eyelid. Laboratory abnormalities include abnormal gamma-glutamyl tersferase conjugated hyperbilirubinemia elevated alanine aminotransferase (ALT) alpha-fetoprotein and aspartate aminotransferase and vitamin D deficiency. The proband is currently awaiting liver transplant.	Full or partial overlap with indication for testing	SNV	ATP6AP1	X	153663493	153663493	c.932T>A	Leu311Gln	Hemizygous	missense_variant	maternal	ATP6AP1-related disorders	X_LINKED	Variant of Uncertain Significance
00267	HIC	Female	See Below (Inconclusive)	hypotrichosis with coarse and fine hair sparse eyebrows and eyelashes failure of nail growth eczema history of infections and one conical upper incisor with no other visible teeth. Dysmorphic features include a flat and depressed nasal bridge and she as full lips. She has developmental delays including speech delay small size for age and short stature.	Full or partial overlap with indication for testing	copy_number_variation		1	236643262	236649528	1	1q42-q43	Heterozygous	6 kb	maternal	Hypohidrotic ectodermal dysplasia	DOMINANT	Uncertain Clinical Significance
00267	HIC	Female	See Below (Inconclusive)	hypotrichosis with coarse and fine hair sparse eyebrows and eyelashes failure of nail growth eczema history of infections and one conical upper incisor with no other visible teeth. Dysmorphic features include a flat and depressed nasal bridge and she as full lips. She has developmental delays including speech delay small size for age and short stature.	Full or partial overlap with indication for testing	SNV	MAPK8IP3				c.2675C>T	p.Thr892Ile	Heterozygous	missense	unknown (not detected in mother)	MAPK8IP3-related disorders	DOMINANT	Variant of Uncertain Significance
00352	HIC	Male	NEGATIVE	cleft palate with bilateral cleft lip bilateral conductive hearing loss imperforate anus with pre-sacral mass duplication of renal collecting system acquired hypothyroidism developmental delay patent foramen ovale g-tube dependence dermoid cysts on scalp and constipation. Hypertelorism posteriorly rotated ears with underdeveloped helices short columnella and widely spaced teeth were noted on phys…
00298	HIC	Female	NEGATIVE	mild scoliosis intractable generalized epilepsy a history of status epilepticus insomnia and difficulties with memory processing and attention.
00368	HIC	Male	POSITIVE	unexplained movement disorder that includes severe choreoathetosis action-induced dyskinesia athetosis dystonia and ataxia. His other clinical features include primary microcephaly minor brain abnormality failure to thrive dysphagia feeding difficulties with swallowing issues gastroesophageal reflux disease emesis afebrile tonic seizures peripheral hypertonia bone fractures being easily bruised s…	Full or partial overlap with indication for testing	SNV	GNAO1	16	56370674	56370674	c.625C>T	Arg209Cys	Heterozygous	missense_variant	de novo	GNAO1-related movement disorder	DOMINANT	Pathogenic
00249	HIC	Male	NEGATIVE	speech and cognitive delays sensory processing disorder behavioral difficulties sleep disturbance and patent foramen ovale with aortopulmonary collaterals. His younger sister has a history of being large for gestational age followed by failure to thrive poor feeding pituitary hypoplasia Arnold Chiari malformation neonatal hypoglycemia blood pressure instability central hypothyroidism adrenal insu…
00252	HIC	Female	See Below (Inconclusive)	a history of being large for gestational age followed by failure to thrive poor feeding pituitary hypoplasia Arnold Chiari malformation neonatal hypoglycemia blood pressure instability central hypothyroidism adrenal insufficiency hypertonia overlapping toes patent ductus arteriosus and delayed milestones. Her older brother has a history of cognitive delays sensory processing disorder behavioral d…	Full or partial overlap with indication for testing	SNV	LAMC3	9	133960931	133960931	c.4051C>T	Arg1351Trp	Heterozygous	missense_variant	paternal	LAMC3-related disorders	RECESSIVE	Variant of Uncertain Significance
00252	HIC	Female	See Below (Inconclusive)	a history of being large for gestational age followed by failure to thrive poor feeding pituitary hypoplasia Arnold Chiari malformation neonatal hypoglycemia blood pressure instability central hypothyroidism adrenal insufficiency hypertonia overlapping toes patent ductus arteriosus and delayed milestones. Her older brother has a history of cognitive delays sensory processing disorder behavioral d…	Full or partial overlap with indication for testing	SNV	LAMC3	9	133942571	133942571	c.2572C>T	Arg858Ter	Heterozygous	stop_gained	maternal	LAMC3-related disorders	RECESSIVE	Variant of Uncertain Significance
00320	HIC	Male	See Below (Inconclusive)	a concern for early-onset inflammatory bowel disease, recurrent diarrhea, eczema, food and environmental allergies, rectal prolapse, rectal bleeding, and Crohn's disease.	Full or partial overlap with indication for testing	SNV	SMG7	1	183519895	183519895	c.3005C>T	Thr1002Ile	Heterozygous	missense_variant	de novo	Disease Association NOS	DOMINANT	Variant of Uncertain Significance
00320	HIC	Male	See Below (Inconclusive)	a concern for early-onset inflammatory bowel disease, recurrent diarrhea, eczema, food and environmental allergies, rectal prolapse, rectal bleeding, and Crohn's disease	Full or partial overlap with indication for testing	copy_number_variation		2	123505936	127418482	1	2q14.3	Heterozygous	3.9 Mb	paternal	Disease Association NOS	DOMINANT	Uncertain Clinical Significance
00370	HIC	Male	See Below (Inconclusive)	includes symmetrical growth deficiency microcephaly bilateral microtia bilateral cleft lip with right cleft palate severe micrognathia subglottic stenosis with glossoptosis velopharyngeal insufficiency bilateral vocal chord paralysis wide spaced and hypoplastic inverted nipples seizures intellectual disability and multiple dysmorphic features. He has multiple skeletal anomalies including radial r…	Full or partial overlap with indication for testing	SNV	CHD7	8	61769241	61769241	c.7402C>T	Pro2468Ser	Heterozygous	missense_variant	maternal	CHARGE syndrome and CHD7-related disorders	DOMINANT	Variant of Uncertain Significance
00370	HIC	Male	See Below (Inconclusive)	includes symmetrical growth deficiency microcephaly bilateral microtia bilateral cleft lip with right cleft palate severe micrognathia subglottic stenosis with glossoptosis velopharyngeal insufficiency bilateral vocal chord paralysis wide spaced and hypoplastic inverted nipples seizures intellectual disability and multiple dysmorphic features. He has multiple skeletal anomalies including radial r…	Full or partial overlap with indication for testing	SNV	ORC1	1	52850835	52850835	c.1581A>G	Gly527	Homozygous	splice_region_variant; synonymous_variant	both	Meier-Gorlin Syndrome	RECESSIVE	Variant of Uncertain Significance
00359	HIC	Male	POSITIVE	Global developmental delay Dandy-Walker syndrome with severe cerebellar hypoplasia diffuse brain injury microcephaly absent teeth abnormal eye movements and no tracking or following nonverbal neonatal supraventricular tachycardia feeding problems wheelchair and tracheostomy/ventilator dependent hypotonia acute renal failure with acute kidney injury trouble regulating temperature osteopenia precoc…	Full or partial overlap with indication for testing	SNV	EXOSC3	9	37783990	37783990	c.395A>C	Asp132Ala	Heterozygous	missense_variant	maternal	Pontocerebellar Hypoplasia	RECESSIVE	Pathogenic
00359	HIC	Male	POSITIVE	Global developmental delay Dandy-Walker syndrome with severe cerebellar hypoplasia diffuse brain injury microcephaly absent teeth abnormal eye movements and no tracking or following nonverbal neonatal supraventricular tachycardia feeding problems wheelchair and tracheostomy/ventilator dependent hypotonia acute renal failure with acute kidney injury trouble regulating temperature osteopenia precoc…	Full or partial overlap with indication for testing	insertion	EXOSC3	9	37784815	37784815	c.226dupG	Asp76GlyfsTer49	Heterozygous	frameshift_variant	unknown (not detected in mother)	Pontocerebellar Hypoplasia	RECESSIVE	Likely Pathogenic
00359	HIC	Male	POSITIVE	Global developmental delay Dandy-Walker syndrome with severe cerebellar hypoplasia diffuse brain injury microcephaly absent teeth abnormal eye movements and no tracking or following nonverbal neonatal supraventricular tachycardia feeding problems wheelchair and tracheostomy/ventilator dependent hypotonia acute renal failure with acute kidney injury trouble regulating temperature osteopenia precoc…	Full or partial overlap with indication for testing	SNV	CXorf56	X	118694304	118694304	c.169C>G	Arg57Gly	Hemizygous	missense_variant	maternal	Intellectual Disability	X_LINKED	Variant of Uncertain Significance
00360	HIC	Male	See Below (Inconclusive)	History of prematurity periventricular leukomalacia global developmental delay asymmetric face with malar hypoplasia cleft uvula high arched palate thin upper vermillion telecanthus infraorbital crease posteriorly rotated ears camptodactyly dental anomalies requiring dental restoration esotropia velopharyngeal insufficiency spastic diplegia cerebral palsy precocious puberty chronic otitis media m…	Full or partial overlap with indication for testing	SNV	FOXP1	3	71021820	71021820	c.1538T>C	Val513Ala	Heterozygous	missense_variant	unknown (not detected in mother)	FOXP1-Related Intellectual Disability Syndrome	DOMINANT	Variant of Uncertain Significance
00360	HIC	Male	See Below (Inconclusive)	History of prematurity periventricular leukomalacia global developmental delay asymmetric face with malar hypoplasia cleft uvula high arched palate thin upper vermillion telecanthus infraorbital crease posteriorly rotated ears camptodactyly dental anomalies requiring dental restoration esotropia velopharyngeal insufficiency spastic diplegia cerebral palsy precocious puberty chronic otitis media m…	Full or partial overlap with indication for testing	SNV	CXorf56	X	118694304	118694304	c.169C>G	Arg57Gly	Hemizygous	missense_variant	maternal	Intellectual Disability	X_LINKED	Variant of Uncertain Significance
00208	HIC	Female	POSITIVE	tall stature aortic root dilation left ventricular non-compaction mild scoliosis developmental delays attention deficit disorder paresthesia of the foot amblyopia Raynauds phenomenon light-headedness with standing hyper extensible elbows and a history of vasculitis. Her father paternal uncle and a paternal first cousin are also reported to have a history of aortic disease and left ventricular non…	Full or partial overlap with indication for testing	SNV	PRDM16	1	3328895	3328895	c.2134C>T	Gln712Ter	Heterozygous	stop_gained	paternal	Left Ventricular Noncompaction Cardiomyopathy	DOMINANT	Likely Pathogenic
00343	HIC	Male	POSITIVE	Prenatal onset growth retardation congenital diaphragmatic hernia with secondary lung hypoplasia microcephaly periventricular leukomalacia history of hemorrhagic stroke facial dysmorphism nystagmus esotropia scoliosis joint laxity recurrent otitis media and failed hearing screening hypospadias cryptorchidism GERD and global developmental delays.	Full or partial overlap with indication for testing	SNV	SMARCA4	19	11143976	11143976	c.3557C>T	Ala1186Val	Heterozygous	missense_variant	de novo	Coffin-Siris Syndrome	DOMINANT	Likely Pathogenic
00347	HIC	Male	NEGATIVE	autism profound intellectual disability aggression self-injurious behavior anxiety withdrawal and stereotypic movements.
00361	HIC	Male	NEGATIVE	myopathy progressive bilateral contractures of the upper extremities developmental delays autism spectrum disorder sleep difficulties food seeking behavior obesity with onset prior to age 2 hyperinsulinism macrocephaly tall stature acanthosis nigricans and hyper-pigmented macules.
00387	HIC	Male	POSITIVE	Severe intellectual disability global developmental delay including receptive and expressive speech delays epilepsy attention deficit hyperactivity disorder autism cortical dysplasia microcephaly cortical visual impairment progressive weakness coordination and balance deficits muscle twitching feeding difficulties reflux recurrent pneumonia drooling.	Full or partial overlap with indication for testing	SNV	TUBB2A	6	3155143	3155143	c.292G>A	Gly98Arg	Heterozygous	missense_variant	de novo	TUBB2A-Related Tubulinopathy	DOMINANT	Likely Pathogenic
00268	HIC	Male	NEGATIVE	intellectual disability dolicocephaly mild flat profile a grade 2/6 heart murmur history of odontogenic cysts nevi abdominal hernia scoliosis and testicular torsion.
00362	HIC	Female	NEGATIVE	developmental delay without regression learning difficulties and attention deficit disorder. A brain MRI revealed delayed myelination and mild ventriculomegaly. She has a history of unilateral hydronephrosis and ureteropelvic junction obstruction. Additional features include a small PFO innocent heart murmur sacral dimple broad forehead and obesity. She has one older and one younger brother with …
00261	HIC	Male	POSITIVE	includes severe progressive microcephaly intellectual disability psychomotor delay lack of speech dysmorphic features including smooth philtrum absent nipples blue sclerae bright skin and hair with two posterior hair whorls. His other clinical features include lower limb hypertonia at birth clumsiness and hyperlaxity.	Full or partial overlap with indication for testing	SNV	CSNK2A1	20	467083	467083	c.997C>T	Arg333Ter	Heterozygous	stop_gained	de novo	CSNK2A1-related neurodevelopmental syndrome	DOMINANT	Likely Pathogenic
00261	HIC	Male	POSITIVE	includes severe progressive microcephaly intellectual disability psychomotor delay lack of speech dysmorphic features including smooth philtrum absent nipples blue sclerae bright skin and hair with two posterior hair whorls. His other clinical features include lower limb hypertonia at birth clumsiness and hyperlaxity.	Full or partial overlap with indication for testing	deletion	HIVEP2	6	143081660	143081661	c.5764delG	Asp1922ThrfsTer6	Heterozygous	frameshift_variant	de novo	HIVEP2-related syndromic intellectual disability	DOMINANT	Pathogenic
00303	LMIC	Male	NEGATIVE	includes large size at birth profound bilateral hearing loss and corresponding expressive language delay bilaterally cupped ears with hypoplastic ear tips right posterior plagiocephaly with ipsilateral frontal bossing and a patent ductus arteriosus ligated at 1 year of age.
00304	LMIC	Male	POSITIVE	global developmental delay including speech and motor delay changed muscle tone multiple dysmorphic features and a very short stature. Bilateral porencephalic cysts and large ventricles were noted in a head CT scan. His other reported clinical features include mild conductive hearing loss flat feet large hands with redundant skin midface hypoplasia small conchae shallow orbits narrow forehead pro…	Full or partial overlap with indication for testing	SNV	NFIX	19	13136168	13136168	c.385C>T	Arg129Cys	Heterozygous	missense_variant	de novo	Marshall-Smith syndrome	DOMINANT	Likely Pathogenic
00309	LMIC	Female	POSITIVE	pre- and postnatal growth deficiency with marked developmental delay and feeble cry. Features also include microcephaly metopic ridge prominent occiput large anterior fontanelle two hair whorls synophrys simple over-folded pinna prominent nasal bridge pectus labial hypoplasia thenar hypoplasia short fifth fingers and a single crease and hallux hammer toe. Bradycardia and hydrocephalus were noted …	Full or partial overlap with indication for testing	copy_number_variation		18	23626739	78014976	3	18q11-2q23	Heterozygous	54.4 Mb	de novo	Trisomy 18 Syndrome	DOMINANT	Pathogenic
00309	LMIC	Female	POSITIVE	pre- and postnatal growth deficiency with marked developmental delay and feeble cry. Features also include microcephaly metopic ridge prominent occiput large anterior fontanelle two hair whorls synophrys simple over-folded pinna prominent nasal bridge pectus labial hypoplasia thenar hypoplasia short fifth fingers and a single crease and hallux hammer toe. Bradycardia and hydrocephalus were noted …	Full or partial overlap with indication for testing	copy_number_variation		5	13199	4012072	1	5p15.33	Heterozygous	4.0 Mb	de novo	5p Deletion Syndrome	DOMINANT	Pathogenic
00315	LMIC	Female	See Below (Inconclusive)	includes malrotation and esophageal atresia and a right-sided unilateral radial limb defect including an absent radius with two digits on the right hand. Other reported features include polyhydramnios respiratory distress and recurrent pulmonary infections secondary to aspiration failure to thrive mild developmental delays and scoliosis.	Incidental Finding	deletion	TTN	2	179604199	179604200	c.12809delA	Glu4270GlyfsTer5	Heterozygous	frameshift_variant	paternal	Dilated Cardiomyopathy Dominant	DOMINANT	Likely Pathogenic
00315	LMIC	Female	See Below (Inconclusive)	includes malrotation and esophageal atresia and a right-sided unilateral radial limb defect including an absent radius with two digits on the right hand. Other reported features include polyhydramnios respiratory distress and recurrent pulmonary infections secondary to aspiration failure to thrive mild developmental delays and scoliosis.	Full or partial overlap with indication for testing	SNV	TP63	3	189612073	189612073	c.1825G>A	Glu609Lys	Heterozygous	missense_variant	maternal	Split-Hand/Foot Malformation	DOMINANT	Variant of Uncertain Significance
00316	LMIC	Female	POSITIVE	includes muscle hypotonia hyporeflexia foot malposition and myopathic facies. Early motor development was normal (achieved sitting and walking with support) but she is unable to walk independently.	Full or partial overlap with indication for testing	SNV	SMN1	5	70247773	70247773	c.840C>T	Phe280	Homozygous	synonymous_variant	both	Spinal Muscular Atrophy	RECESSIVE	Pathogenic
00312	LMIC	Male	NEGATIVE	includes disproportionate short stature secondary to severe scoliosis due to hemivertebrae prominent calcaneus absent lacrimal ducts an abnormality of the dental enamel and high cholesterol levels. Noted dysmorphic features include bilateral epicanthal folds midface hypoplasia sparse dry and abnormal hair eyelashes and eyebrows full lips a low nasal bridge and a low hair line.
00310	LMIC	Male	POSITIVE	a severe progressive neurological condition. He has normal growth but is skinny becomes very stiff and spastic at any attempted voluntary movement but is relaxed when asleep and has no contractures. He has poor head control and frequently jerks his head back. He has severe spastic quadriparesis with increased tone a sustained gait gurgling respiration seizures low anterior hairline lateral forehe…	Full or partial overlap with indication for testing	insertion	SLC16A2	X	73740921	73740921	c.532dupG	Ala178GlyfsTer63	Hemizygous	frameshift_variant	unknown	Allan-Herndon-Dudley Syndrome	X_LINKED	Pathogenic
00307	LMIC	Male	See Below (Inconclusive)	short stature bicuspid aortic valve with stenosis and mild insufficiency hypothyroidism frontal upsweep of hair flat face upslanting short palpebral fissures epicanthal folds big ear lobes underdeveloped superior helices prominent nose with bulbous tip small nares long and smooth philtrum severe tooth decay 5th finger clinodactyly on the right hand and anxiety.	Full or partial overlap with indication for testing	insertion	PUM1	1	31409580	31409580	c.3341_3344dupTATA	Thr1116IlefsTer18	Heterozygous	frameshift_variant	de novo	Pumilio1-associated developmental disability ataxia and seizure (PADDAS)	DOMINANT	Variant of Uncertain Significance
00306	LMIC	Male	POSITIVE	persistent hyperkeratotic rash since infancy predominantly affecting his palms soles and limbs.	Full or partial overlap with indication for testing	SNV	CTSC	11	88027463	88027463	c.1103G>A	Gly368Glu	Heterozygous	missense_variant	maternal	CTSC-Related Disorders	RECESSIVE	Variant of Uncertain Significance
00306	LMIC	Male	POSITIVE	persistent hyperkeratotic rash since infancy predominantly affecting his palms soles and limbs.	Full or partial overlap with indication for testing	SNV	CTSC	11	88068220	88068220	c.203T>G	Leu68Arg	Heterozygous	missense_variant	paternal	CTSC-Related Disorders	RECESSIVE	Likely Pathogenic
00305	LMIC	Female	See Below (Inconclusive)	global developmental delays intellectual disability epilepsy ataxia and microcephaly. Other features include ptosis esotropia coarse facial appearance constipation and flat feet.	Full or partial overlap with indication for testing	SNV	SLC2A1	1	43396774	43396774	c.218C>T	Ser73Phe	Heterozygous	missense_variant	unknown (not detected in mother)	Glucose Transporter Type 1 Deficiency Syndrome	DOMINANT	Variant of Uncertain Significance
00308	LMIC	Female	POSITIVE	developmental delay with minimal speech microcephaly a narrow forehead with a low anterior hairline micrognathia broad palate with dental malocclusion hyperextensible fingers and dysmorphic facial features including straight bushy eyebrows straight nose and anteverted nares thick lips and long/poorly defined philtrum. She has a history of an abnormal EEG showing presence of slow background with f…	Full or partial overlap with indication for testing	deletion	DDX3X	X	41204540	41204542	c.1135_1136delAT	Met379AspfsTer3	Heterozygous	frameshift_variant	unknown (not detected in mother)	DDX3X-related X-linked intellectual disability	X_LINKED	Pathogenic
00311	LMIC	Male	See Below (Inconclusive)	unilateral cleft lip and palate developmental delays hyperactivity and dysmorphic features including bilateral ptosis midface hypoplasia hypoplastic orbits arched eyebrows and prominent antihelix bilaterally. His father has a cleft lip.	Full or partial overlap with indication for testing	deletion	ZNF462	9	109765574	109765594	c.7058_7077delTAAGCCGTAACTTTGAGCTG	Val2353GlyfsTer5	Heterozygous	frameshift_variant; splice_region_variant	de novo	ZNF462-related spectrum disorder	DOMINANT	Likely Pathogenic
00311	LMIC	Male	See Below (Inconclusive)	unilateral cleft lip and palate developmental delays hyperactivity and dysmorphic features including bilateral ptosis midface hypoplasia hypoplastic orbits arched eyebrows and prominent antihelix bilaterally. His father has a cleft lip.	Full or partial overlap with indication for testing	SNV	NBEA	13	35756525	35756525	c.4691C>T	Ala1564Val	Heterozygous	missense_variant	paternal	NBEA-related intellectual disability	DOMINANT	Variant of Uncertain Significance
00311	LMIC	Male	See Below (Inconclusive)	unilateral cleft lip and palate developmental delays hyperactivity and dysmorphic features including bilateral ptosis midface hypoplasia hypoplastic orbits arched eyebrows and prominent antihelix bilaterally. His father has a cleft lip.	Full or partial overlap with indication for testing	SNV	NIPBL	5	37006552	37006552	c.3949A>G	Ile1317Val	Heterozygous	missense_variant	paternal	Cornelia de Lange Syndrome	DOMINANT	Variant of Uncertain Significance
00350	HIC	Male	NEGATIVE	global developmental delays prenatal onset small stature microcephaly sagittal craniosynostosis with dolichocephaly dysmorphic facial features anomalous right coronary artery and apical left ventricular hypertrophy respiratory issues and biopsy suggestive of a possible ciliary inclusion disorder feeding disorder hydronephrosis hypospadias inguinal hernia undescended testes skeletal survey suggest…
00302	LMIC	Male	See Below (Inconclusive)	intellectual disability learning difficulties and dysmorphic features including sparse eyebrows broad and depressed nasal bridge and a bulbous nasal tip horizontal philtrum with gingival hypertrophy malocclusion with retrognathia bifid uvula cauliflower appearance to the left ear single palmar creases and incomplete extension of the fingers. Other features include cortical atrophy with temporal s…	Full or partial overlap with indication for testing	SNV	NBEA	13	35619096	35619096	c.539A>G	Asp180Gly	Heterozygous	missense_variant	unknown	NBEA-related intellectual disability	DOMINANT	Variant of Uncertain Significance
00302	LMIC	Male	See Below (Inconclusive)	intellectual disability learning difficulties and dysmorphic features including sparse eyebrows broad and depressed nasal bridge and a bulbous nasal tip horizontal philtrum with gingival hypertrophy malocclusion with retrognathia bifid uvula cauliflower appearance to the left ear single palmar creases and incomplete extension of the fingers. Other features include cortical atrophy with temporal s…	Full or partial overlap with indication for testing	SNV	SYT1	12	79679624	79679624	c.224G>T	Cys75Phe	Heterozygous	missense_variant	unknown	SYT1-associated neurodevelopmental disorder	DOMINANT	Variant of Uncertain Significance
00302	LMIC	Male	See Below (Inconclusive)	intellectual disability learning difficulties and dysmorphic features including sparse eyebrows broad and depressed nasal bridge and a bulbous nasal tip horizontal philtrum with gingival hypertrophy malocclusion with retrognathia bifid uvula cauliflower appearance to the left ear single palmar creases and incomplete extension of the fingers. Other features include cortical atrophy with temporal s…	Full or partial overlap with indication for testing	copy_number_variation		9	131282528	131720659	3	9q34.11	Heterozygous	438 Kb	unknown	Disease Association NOS	DOMINANT	Uncertain Clinical Significance
00432	HIC	Male	POSITIVE	a history of hypotonia developmental delay developmental regression hexosaminidase A deficiency biochemically bilateral cherry red spots seizures and a MRI suggestive of a leukodystrophy/ leukocephalopathy.	Full or partial overlap with indication for testing	SNV	HEXA	15	72640388	72640388	c.1073+1G>A		Heterozygous	splice_donor_variant	paternal	Hexosaminidase A Deficiency	RECESSIVE	Pathogenic
00432	HIC	Male	POSITIVE	a history of hypotonia developmental delay developmental regression hexosaminidase A deficiency biochemically bilateral cherry red spots seizures and a MRI suggestive of a leukodystrophy/ leukocephalopathy.	Full or partial overlap with indication for testing	SNV	HEXA	15	72637818	72637818	c.1495C>T	Arg499Cys	Heterozygous	missense_variant	maternal	Hexosaminidase A Deficiency	RECESSIVE	Pathogenic
00313	LMIC	Male	POSITIVE	intellectual disability autistic features suspected anxiety self-injurious behavior seizures low-normal head circumference and dysmorphic features. He is nonverbal and requires special schooling. His other features include microcalcifications of choroid plexus abnormal bone age arthritis and spina bifida occulta.	Full or partial overlap with indication for testing	SNV	ASXL3	18	31322918	31322918	c.3106C>T	Arg1036Ter	Heterozygous	stop_gained	unknown (not detected in mother)	Bainbridge-Ropers Syndrome	DOMINANT	Pathogenic
00344	HIC	Male	See Below (Inconclusive)	includes developmental delay microcephaly failure to thrive hypotonia bilateral hand tremors and hemangiomas.	Full or partial overlap with indication for testing	SNV	COX1	MT	6480	6480	c.577G>A	Val193Ile	Hemizygous	missense_variant	maternal	Cytochrome C Oxidase Deficiency	MITOCHONDRIAL	Variant of Uncertain Significance
00378	HIC	Male	NEGATIVE	multiple cardiac abnormalities including pulmonary valve stenosis atrial septal defect premature ventricular contraction hypertension right ventricular failure pericardial effusion a history of cardiac tamponade and heart surgery. Other phenotypic features are noted: macrocephaly sagittal craniosynostosis prominent neck misalignment of teeth high arched palate and tall stature. Other clinical man…
00354	HIC	Male	POSITIVE	Adult male with severe intellectual disability obsessive compulsive disorder anxiety hyperactivity agenesis of the corpus callosum 2-3 toe syndactyly and a sister with a similar presentation	Full or partial overlap with indication for testing	copy_number_variation		8	145033578	146296885	3	8q24.3-qter	Heterozygous	1.26 Mb	unknown (dad not tested), Break-point analyses suggest the patient’s mother carries a balanced form of this translocation	Disease Association NOS	DOMINANT	Uncertain Clinical Significance
00354	HIC	Male	POSITIVE	Adult male with severe intellectual disability obsessive compulsive disorder anxiety hyperactivity agenesis of the corpus callosum 2-3 toe syndactyly and a sister with a similar presentation	Full or partial overlap with indication for testing	copy_number_variation		22	50099570	51187115	1	22q13.33-qter	Heterozygous	1.09 Mb	unknown (dad not tested), Break-point analyses suggest the patient’s mother carries a balanced form of this translocation	22q13.3 deletion syndrome	DOMINANT	Pathogenic
00375	HIC	Female	See Below (Inconclusive)	history of two fractures with minimal trauma blue sclera bradycardia with sinus arrhythmia and a benign heart murmur. Her mother and eldest brother have similar medical histories of multiple fractures and blue sclera in addition to other features supporting clinical suspicion for osteogenesis imperfecta or a related connective tissue disorder.	Full or partial overlap with indication for testing	deletion	TNFRSF11B	8	119941148	119941150	c.419_420delCA	Thr140SerfsTer13	Heterozygous	frameshift_variant	maternal	Juvenile Paget Disease	RECESSIVE	Likely Pathogenic
00269	HIC	Male	See Below (Inconclusive)	history of two fractures with minimal trauma hypermobility astigmatism hyperopia developmental delays attention deficit hyperactivity disorder autism spectrum disorder delayed gastric emptying gastroesophageal reflux and 2/3 toe syndactyly. His mother and younger sister have histories of multiple fractures and blue sclera in addition to other features supporting clinical suspicion for osteogenesi…	Incidental Finding	SNV	PALB2	16	23614792	23614792	c.3549C>G	Tyr1183Ter	Heterozygous	stop_gained	maternal	PALB2-Related Cancer Susceptibility [DO NOT USE]	DOMINANT	Pathogenic
00269	HIC	Male	See Below (Inconclusive)	history of two fractures with minimal trauma hypermobility astigmatism hyperopia developmental delays attention deficit hyperactivity disorder autism spectrum disorder delayed gastric emptying gastroesophageal reflux and 2/3 toe syndactyly. His mother and younger sister have histories of multiple fractures and blue sclera in addition to other features supporting clinical suspicion for osteogenesi…	Full or partial overlap with indication for testing	deletion	TNFRSF11B	8	119941148	119941150	c.419_420delCA	Thr140SerfsTer13	Heterozygous	frameshift_variant	maternal	Juvenile Paget Disease	RECESSIVE	Likely Pathogenic
00357	HIC	Female	NEGATIVE	indeterminate colitis that is inflammatory non-penetrating and non-stricturing perianal disease perianal skin tags loose stools pain during stool passage and leukocytosis.
00369	HIC	Male	See Below (Inconclusive)	learning disability attention deficit hyperactivity disorder hand joint hyper-mobility and arachnodactyly arthralgia myalgia easy fatigability flat feet bilateral epicanthal folds helical ear pit myopia and history of esotropia.	Full or partial overlap with indication for testing	SNV	TNXB	6	32026114	32026114	c.7546G>A	Ala2516Thr	Heterozygous	missense_variant	paternal	Ehlers Danlos Syndrome Tenascin-X Deficiency	RECESSIVE	Variant of Uncertain Significance
00369	HIC	Male	See Below (Inconclusive)	learning disability attention deficit hyperactivity disorder hand joint hyper-mobility and arachnodactyly arthralgia myalgia easy fatigability flat feet bilateral epicanthal folds helical ear pit myopia and history of esotropia.	Full or partial overlap with indication for testing	SNV	TNXB	6	32035662	32035662	c.6320C>G	Ser2107Cys	Heterozygous	missense_variant	maternal	Ehlers Danlos Syndrome Tenascin-X Deficiency	RECESSIVE	Variant of Uncertain Significance
00282	HIC	Male	POSITIVE	developmental delay language delay mild to moderate intellectual disability clumsiness hypertropia bilateral cryptorchidism normal bone age normal brain MRI a pathological EEG but no history of epilepsy and dysmorphic features including high forehead small and cupped ears an asymmetrical face pointed chin and small lips.	Full or partial overlap with indication for testing	SNV	NFIX	19	13135950	13135950	c.167T>A	Met56Lys	Heterozygous	missense_variant	de novo	Malan Syndrome	DOMINANT	Likely Pathogenic
00221	HIC	Female	POSITIVE	retinal disease resulting in low vision since birth pre-diabetes and thyroid disease.	Full or partial overlap with indication for testing	SNV	RPE65	1	68904873	68904873	c.858+1G>T		Homozygous	splice_donor_variant	both	Leber Congenital Amaurosis	RECESSIVE	Pathogenic
00221	HIC	Female	POSITIVE	retinal disease resulting in low vision since birth pre-diabetes and thyroid disease.	Full or partial overlap with indication for testing	copy_number_variation		13	52170957	57713087	3	13q14.3-q21.1	Heterozygous	5.5 Mb	paternal	Disease Association NOS	DOMINANT	Uncertain Clinical Significance
00284	HIC	Male	See Below (Inconclusive)	mild intellectual disability speech delay hypotonia motor impairment ataxic gait muscle fatigue after exercise bilateral sensorineural hearing loss Leigh-like cerebral anomalies hepatic steatosis metabolic acidosis and facial dysmorphisms including hypertelorism blue sclera broad nasal bridge bulbous nasal tip thin upper lip and a pointed chin.	Full or partial overlap with indication for testing	SNV	BRWD3	X	79988964	79988964	c.1118A>G	Asn373Ser	Hemizygous	missense_variant	maternal	BRWD3-related X-linked syndromic intellectual disability	X_LINKED	Variant of Uncertain Significance
00284	HIC	Male	See Below (Inconclusive)	mild intellectual disability speech delay hypotonia motor impairment ataxic gait muscle fatigue after exercise bilateral sensorineural hearing loss Leigh-like cerebral anomalies hepatic steatosis metabolic acidosis and facial dysmorphisms including hypertelorism blue sclera broad nasal bridge bulbous nasal tip thin upper lip and a pointed chin.	Full or partial overlap with indication for testing	SNV	TRNK	MT	8357	8357	n.63T>C		Hemizygous	non_coding_transcript_exon_variant; non_coding_transcript_variant		MT-TK-related mitochondrial disorders	MITOCHONDRIAL	Variant of Uncertain Significance
00247	HIC	Male	POSITIVE	with severe intellectual disability drug-resistant epilepsy Hirschsprung disease constipation scoliosis and multiple dysmorphic features including posteriorly rotated ears with posterior earlobe crease sparse thin eyelashes pectus carinatum phalangeal hypoplasia camptodactyly clubbing fingers and toes and nail hypoplasia. He was also noted to have thin corpus callosum and frontotemporal atrophy o…	Full or partial overlap with indication for testing	SNV	PIGO	9	35090462	35090462	c.2854+1G>A		Heterozygous	splice_donor_variant	paternal	Hyperphosphatasia with Intellectual Disability Syndrome Type 2	RECESSIVE	Likely Pathogenic
00247	HIC	Male	POSITIVE	with severe intellectual disability drug-resistant epilepsy Hirschsprung disease constipation scoliosis and multiple dysmorphic features including posteriorly rotated ears with posterior earlobe crease sparse thin eyelashes pectus carinatum phalangeal hypoplasia camptodactyly clubbing fingers and toes and nail hypoplasia. He was also noted to have thin corpus callosum and frontotemporal atrophy o…	Full or partial overlap with indication for testing	SNV	PIGO	9	35095484	35095484	c.79G>A	Gly27Ser	Heterozygous	missense_variant	maternal	Hyperphosphatasia with Intellectual Disability Syndrome Type 2	RECESSIVE	Variant of Uncertain Significance
00325	HIC	Female	POSITIVE	global developmental delay including gross motor delay microcephaly plagiocephaly slow weight gain high myopia severe language impairment scattered patches of eczema and hypopigmentation and dysmorphic facial features including short columella short philtrum downslanting palpebral fissures low set ears and mild malar hypoplasia. Hypotonia was also noted in the early years but has since improved.	Full or partial overlap with indication for testing	insertion	VPS13B	8	100865697	100865697	c.10156dupA	Thr3386AsnfsTer3	Heterozygous	frameshift_variant	maternal	Cohen Syndrome	RECESSIVE	Pathogenic
00325	HIC	Female	POSITIVE	global developmental delay including gross motor delay microcephaly plagiocephaly slow weight gain high myopia severe language impairment scattered patches of eczema and hypopigmentation and dysmorphic facial features including short columella short philtrum downslanting palpebral fissures low set ears and mild malar hypoplasia. Hypotonia was also noted in the early years but has since improved.	Full or partial overlap with indication for testing	deletion	VPS13B	8	100128062	100128066	c.901_904delACTT	Thr301ValfsTer7	Heterozygous	frameshift_variant	paternal	Cohen Syndrome	RECESSIVE	Pathogenic
00392	LMIC	Female	See Below (Inconclusive)	developmental delay hypotonia hyperreflexia difficulty coordinating voluntary movements dysgenesis of the corpus callosum mild atrophy of the cerebellum and cortex obesity conduct disorder and mild intellectual disability. Her other features include strabismus almond-shaped palpebral fissures hypogenitalism genu valgu and decreased pelvic grid strength.	Full or partial overlap with indication for testing	SNV	PIEZO2	18	10696094	10696094	c.6829A>G	Ile2277Val	Heterozygous	missense_variant	de novo	Marden-Walker Syndrome	DOMINANT	Variant of Uncertain Significance
00392	LMIC	Female	See Below (Inconclusive)	developmental delay hypotonia hyperreflexia difficulty coordinating voluntary movements dysgenesis of the corpus callosum mild atrophy of the cerebellum and cortex obesity conduct disorder and mild intellectual disability. Her other features include strabismus almond-shaped palpebral fissures hypogenitalism genu valgu and decreased pelvic grid strength.	Full or partial overlap with indication for testing	copy_number_variation		2	204312775	208235204	3	2q33.2-q33.3	Heterozygous	3.9 Mb	de novo	Disease Association NOS	DOMINANT	Uncertain Clinical Significance
00392	LMIC	Female	See Below (Inconclusive)	developmental delay hypotonia hyperreflexia difficulty coordinating voluntary movements dysgenesis of the corpus callosum mild atrophy of the cerebellum and cortex obesity conduct disorder and mild intellectual disability. Her other features include strabismus almond-shaped palpebral fissures hypogenitalism genu valgu and decreased pelvic grid strength.	Full or partial overlap with indication for testing	copy_number_variation		1	39340597	40603856	1	1p34.3-p34.2	Heterozygous	1.3 Mb	de novo	Disease Association NOS	DOMINANT	Uncertain Clinical Significance
00337	LMIC	Female	POSITIVE	generalized hypotonia global developmental delay intellectual disability frequent falls proximal bilateral muscle weakness and muscular atrophy in all limbs and especially in proximal regions. She is described to have facial asymmetry pectus excavatum hyperlordosis kyphosis diminished tendon reflexes minipolymyoclonus of distal regions of limbs and tongue. Elevated CPK levels and an EMG consisten…	Full or partial overlap with indication for testing	SNV	ASAH1	8	17933050	17933050	c.173C>T	Thr58Met	Homozygous	missense_variant; splice_region_variant	both	ASAH1-related disorders	RECESSIVE	Pathogenic
00336	LMIC	Female	See Below (Inconclusive)	includes global developmental delay cerebral dysgenesis (including lissencephaly and pachygyria) language delay impulsive behaviors and minor dysmorphic features. The proband and mother also have joint hyperlaxity.	Incidental Finding	SNV	SUFU	10	104359302	104359302	c.1022+1G>A		Heterozygous	splice_donor_variant	maternal	SUFU-Related Disorders	DOMINANT	Pathogenic
00338	LMIC	Male	POSITIVE	epilepsy neuronal migratory disorder (heterotopia) neuromotor and neurodevelopmental delay motor delay global developmental delay allergic rhinitis cerebral palsy generalized weakness uncoordinated walk hypertrichosis minor dysmorphic features and focal cortical dysplasia.	Full or partial overlap with indication for testing	SNV	GFAP	17	42992596	42992596	c.259G>C	Val87Leu	Heterozygous	missense_variant	de novo	Alexander Disease	DOMINANT	Pathogenic
00346	LMIC	Male	POSITIVE	progressive hypotonia weakness and muscle atrophy which is especially pronounced in the lower extremities and proximal limbs and elevated CK levels. His cognitive development has been normal and he has no known cardiac involvement.	Full or partial overlap with indication for testing	SNV	DMD	X	31279780	31279780	c.9225-647A>G		Hemizygous	intron_variant	maternal	Dystrophinopathies	X_LINKED	Likely Pathogenic
00270	HIC	Male	See Below (Inconclusive)	bilateral external auditory canal atresia requiring surgical repair bilateral conductive hearing loss intellectual disability global developmental delays anxiety ADHD and some features consistent with an autism spectrum disorder. Family history is notable for the following: 1) hearing loss in the probands father some full siblings and other paternal relatives; 2) 4q35.2 deletion and balanced t(4;…	Full or partial overlap with indication for testing	SNV	TSHZ1	18	72923834	72923834	c.3G>A	Met1?	Heterozygous	start_lost	paternal	Congenital Aural Atresia	DOMINANT	Variant of Uncertain Significance
00270	HIC	Male	See Below (Inconclusive)	bilateral external auditory canal atresia requiring surgical repair bilateral conductive hearing loss intellectual disability global developmental delays anxiety ADHD and some features consistent with an autism spectrum disorder. Family history is notable for the following: 1) hearing loss in the probands father some full siblings and other paternal relatives; 2) 4q35.2 deletion and balanced t(4;…	Full or partial overlap with indication for testing	copy_number_variation		8	32691933	33893567	3	8p12	Heterozygous	1.2 Mb	unknown (not detected in father)	Disease Association NOS	DOMINANT	Uncertain Clinical Significance
00270	HIC	Male	See Below (Inconclusive)	bilateral external auditory canal atresia requiring surgical repair bilateral conductive hearing loss intellectual disability global developmental delays anxiety ADHD and some features consistent with an autism spectrum disorder. Family history is notable for the following: 1) hearing loss in the probands father some full siblings and other paternal relatives; 2) 4q35.2 deletion and balanced t(4;…	Full or partial overlap with indication for testing	copy_number_variation		4	127174800	127941267	1	4q28.1	Heterozygous	766 kb	unknown (not detected in father)	Disease Association NOS	DOMINANT	Uncertain Clinical Significance
00270	HIC	Male	See Below (Inconclusive)	bilateral external auditory canal atresia requiring surgical repair bilateral conductive hearing loss intellectual disability global developmental delays anxiety ADHD and some features consistent with an autism spectrum disorder. Family history is notable for the following: 1) hearing loss in the probands father some full siblings and other paternal relatives; 2) 4q35.2 deletion and balanced t(4;…	Full or partial overlap with indication for testing	copy_number_variation		4	190022659	190795978	1	4q35.2	Heterozygous	773 kb	unknown (not detected in father)	Disease Association NOS	DOMINANT	Uncertain Clinical Significance
00335	LMIC	Female	See Below (Inconclusive)	presenting with a short webbed neck cervical hemivertebrae square shoulders scoliosis facial asymmetry right preauricular appendage ear plug slight hypotonia of limbs mild developmental delay and epistaxis. She has a twin sister of unknown zygosity who is reported to be unaffected aside from epistaxis.	Full or partial overlap with indication for testing	SNV	BRAF	7	140482898	140482898	c.1237G>A	Val413Met	Heterozygous	missense_variant	paternal	Noonan Syndrome	DOMINANT	Variant of Uncertain Significance
00335	LMIC	Female	See Below (Inconclusive)	presenting with a short webbed neck cervical hemivertebrae square shoulders scoliosis facial asymmetry right preauricular appendage ear plug slight hypotonia of limbs mild developmental delay and epistaxis. She has a twin sister of unknown zygosity who is reported to be unaffected aside from epistaxis.	Full or partial overlap with indication for testing	SNV	WNT5A	3	55508502	55508502	c.547G>A	Gly183Ser	Heterozygous	missense_variant	paternal	Robinow Syndrome	DOMINANT	Variant of Uncertain Significance
00203	HIC	Male	POSITIVE	includes encephalopathy characterized by developmental and speech delays. He had normal development until regression occurred at the age of one and a half years. He is non-verbal has seizures which began at the age of two is G-tube dependent and MRI imaging noted cerebellar volume loss. He is also noted to have bilateral lower extremity hypertonia truncal hypotonia tight heel cords history of und…	Full or partial overlap with indication for testing	SNV	PLA2G6	22	38512183	38512183	c.1778C>T	Pro593Leu	Heterozygous	missense_variant	paternal	infantile neuroaxonal dystrophy 1	RECESSIVE	Likely Pathogenic
00203	HIC	Male	POSITIVE	includes encephalopathy characterized by developmental and speech delays. He had normal development until regression occurred at the age of one and a half years. He is non-verbal has seizures which began at the age of two is G-tube dependent and MRI imaging noted cerebellar volume loss. He is also noted to have bilateral lower extremity hypertonia truncal hypotonia tight heel cords history of und…	Full or partial overlap with indication for testing	SNV	PLA2G6	22	38541484	38541484	c.386T>C	Leu129Pro	Heterozygous	missense_variant	maternal	infantile neuroaxonal dystrophy 1	RECESSIVE	Variant of Uncertain Significance
00271	HIC	Male	POSITIVE	developmental delay autism ADHD hypertonia leg length discrepancy anteversion of the femur left internal tibial torsion mild bilateral tibiotalar slant plantar valgus deformity pes planus long fingers and toes and facial dysmorphisms including broad forehead malar hypoplasia overbite and large upper incisors high arched and narrow palate thick and high arched eyebrows thin synophrys and small ear…	Full or partial overlap with indication for testing	SNV	NFIB	9	14146712	14146712	c.901C>T	Arg301Ter	Heterozygous	stop_gained	unknown	Acquired Macrocephaly with Impaired Intellectual Development	DOMINANT	Likely Pathogenic
00271	HIC	Male	POSITIVE	developmental delay autism ADHD hypertonia leg length discrepancy anteversion of the femur left internal tibial torsion mild bilateral tibiotalar slant plantar valgus deformity pes planus long fingers and toes and facial dysmorphisms including broad forehead malar hypoplasia overbite and large upper incisors high arched and narrow palate thick and high arched eyebrows thin synophrys and small ear…	Full or partial overlap with indication for testing	SNV	ARID1A	1	27105643	27105643	c.5254A>G	Lys1752Glu	Heterozygous	missense_variant	unknown	Coffin-Siris Syndrome	DOMINANT	Variant of Uncertain Significance
00394	LMIC	Male	See Below (Inconclusive)	congenital ichthyosis mild developmental delay short stature multiple food allergies chronic diarrhea and minor dysmorphic features. He was clinically diagnosed with Netherton syndrome. His one-year-old brother has the same phenotype.	Full or partial overlap with indication for testing	SNV	SPINK5	5	147480035	147480035	c.1111C>T	Arg371Ter	Heterozygous	stop_gained	maternal	Netherton Syndrome	RECESSIVE	Pathogenic
00162	HIC	Male	See Below (Inconclusive)	includes cholestasis hepatic dysfunction direct hyperbilirubinemia and hepatosplenomegaly. There is also concern for underlying immunodeficiency considering his recurrent thrush CMV seropositivity and failure to thrive.	Full or partial overlap with indication for testing	SNV	STAT1	2	191850352	191850352	c.1256C>G	Thr419Arg	Heterozygous	missense_variant	maternal	Chronic Mucocutaneous Candidiasis Disease	DOMINANT	Variant of Uncertain Significance
00377	LMIC	Female	See Below (Inconclusive)	includes global developmental delay macrocephaly coarse facial features wide nose epiblepharon short neck syndactyly oligodactyly and hypotonia. She also has multiple lipomas on her arms and thorax an asymmetric thoracic cavity cardiac murmur and mild splenomegaly.	Full or partial overlap with indication for testing	SNV	RELN	7	103162547	103162547	c.7590C>A	Asn2530Lys	Heterozygous	missense_variant	paternal	Lissencephaly Recessive	RECESSIVE	Variant of Uncertain Significance
00377	LMIC	Female	See Below (Inconclusive)	includes global developmental delay macrocephaly coarse facial features wide nose epiblepharon short neck syndactyly oligodactyly and hypotonia. She also has multiple lipomas on her arms and thorax an asymmetric thoracic cavity cardiac murmur and mild splenomegaly.	Full or partial overlap with indication for testing	SNV	RELN	7	103230157	103230157	c.4031G>A	Gly1344Asp	Heterozygous	missense_variant	maternal	Lissencephaly Recessive	RECESSIVE	Variant of Uncertain Significance
00377	LMIC	Female	See Below (Inconclusive)	includes global developmental delay macrocephaly coarse facial features wide nose epiblepharon short neck syndactyly oligodactyly and hypotonia. She also has multiple lipomas on her arms and thorax an asymmetric thoracic cavity cardiac murmur and mild splenomegaly.	Full or partial overlap with indication for testing	SNV	GNPTAB	12	102157979	102157979	c.2715+1G>A		Heterozygous	splice_donor_variant	maternal	GNPTAB-Related Mucolipidoses	RECESSIVE	Pathogenic
00367	HIC	Male	NEGATIVE	history of developmental and speech delay (is nonverbal) autism spectrum disorder adjustment disorder with mixed disturbance of emotions and conduct and epilepsy. He also has a history of hepatosplenomegaly inflammatory gastrointestinal changes chronic intermittent vomiting diarrhea low fecal elastase eosinophilic esophagitis weight loss protein losing enteropathy macrocytic anemia with reticuloc…
00281	HIC	Male	NEGATIVE	hypotonia since birth blue sclerae proptosis midface hypoplasia ear anomalies atrial septal defect rhizomelia delayed bone age hypertrichosis and hepatosplenomegaly.
00328	HIC	Female	POSITIVE	includes recurrent liver failure with hypoglycemia transaminitis gallstones sludge and coagulopathy. In her newborn screening high citrulline levels were noted.	Full or partial overlap with indication for testing	SNV	DLD	7	107555951	107555951	c.685G>T	Gly229Cys	Homozygous	missense_variant;splice_region_variant	both	DLD-Related Disorders	RECESSIVE	Pathogenic
00272	HIC	Female	See Below (Inconclusive)	choanal atresia nasopharyngeal lipoma bilateral sensorineural hearing loss bilateral ear fistulas finger pads elongated fingers aplasia/hypoplasia of nipples with small and hypopigmented areolae intellectual disability dysmorphic features including malformed auricles bitemporal narrowing squared facies micrognathia blue sclerae and upslanting palpebral fissures.	Full or partial overlap with indication for testing	SNV	KMT2D	12	49427995	49427995	c.10595T>C	Ile3532Thr	Heterozygous	missense_variant	de novo	Kabuki Syndrome - KMT2D	DOMINANT	Variant of Uncertain Significance
00272	HIC	Female	See Below (Inconclusive)	choanal atresia nasopharyngeal lipoma bilateral sensorineural hearing loss bilateral ear fistulas finger pads elongated fingers aplasia/hypoplasia of nipples with small and hypopigmented areolae intellectual disability dysmorphic features including malformed auricles bitemporal narrowing squared facies micrognathia blue sclerae and upslanting palpebral fissures.	Full or partial overlap with indication for testing	SNV	SMCHD1	18	2769795	2769795	c.4823T>G	Ile1608Ser	Heterozygous	missense_variant	paternal	Bosma Arhinia Microphthalmia Syndrome	DOMINANT	Variant of Uncertain Significance
00380	HIC	Male	See Below (Inconclusive)	developmental delay stereotyped hand movements hypotonia epileptiform activity drop attacks tracheomalacia stridor and penile chordee with prominent midline raphe. His other clinical findings include occasional toe-walking mild ataxia mild dysmorphic features erythema of conjunctiva and periorbital area hyperopia recurrent otitis media sleep disturbances and history of apnea with perioral cyanosi…	Incidental Finding	deletion	CHEK2	22	29091856	29091857	c.1229delC	Thr410MetfsTer15	Heterozygous	frameshift_variant	paternal	CHEK2-Related Cancer Susceptibility	DOMINANT	Pathogenic
00380	HIC	Male	See Below (Inconclusive)	developmental delay stereotyped hand movements hypotonia epileptiform activity drop attacks tracheomalacia stridor and penile chordee with prominent midline raphe. His other clinical findings include occasional toe-walking mild ataxia mild dysmorphic features erythema of conjunctiva and periorbital area hyperopia recurrent otitis media sleep disturbances and history of apnea with perioral cyanosi…	Full or partial overlap with indication for testing	SNV	POLR3B	12	106820994	106820994	c.1121A>G	Glu374Gly	Heterozygous	missense_variant	maternal	Pol III-Related Leukodystrophy	RECESSIVE	Variant of Uncertain Significance
00380	HIC	Male	See Below (Inconclusive)	developmental delay stereotyped hand movements hypotonia epileptiform activity drop attacks tracheomalacia stridor and penile chordee with prominent midline raphe. His other clinical findings include occasional toe-walking mild ataxia mild dysmorphic features erythema of conjunctiva and periorbital area hyperopia recurrent otitis media sleep disturbances and history of apnea with perioral cyanosi…	Full or partial overlap with indication for testing	SNV	POLR3B	12	106770210	106770210	c.478G>A	Glu160Lys	Heterozygous	missense_variant	paternal	Pol III-Related Leukodystrophy	RECESSIVE	Variant of Uncertain Significance
00358	LMIC	Male	POSITIVE	includes chronic kidney disease due to focal segmental glomerulosclerosis tubular acidosis developmental delay short stature microcephaly microphthalmia microcornea and strabismus. He is also noted to have conductive hypacusia absent stapedial reflexes and recurrent otitis media.	Full or partial overlap with indication for testing	SNV	COL4A1	13	110830429	110830429	c.2608G>A	Gly870Arg	Heterozygous	missense_variant	de novo	COL4A1-Related Disorders	DOMINANT	Pathogenic
00273	HIC	Male	POSITIVE	sensorineural hearing loss psychomotor delay delayed bone age facial dysmorphism synophrys epicanthus monolateral ptosis ear anomalies short corpus callosum and choroid plexus cysts.	Full or partial overlap with indication for testing	insertion	ANKRD11	16	89347391	89347391	c.5558dupC	Asp1854ArgfsTer96	Heterozygous	frameshift_variant	maternal	KBG Syndrome	DOMINANT	Likely Pathogenic
00363	LMIC	Female	NEGATIVE	several features suggestive of a connective disorder including tall stature dolicostenomelia arachnodactyly joint laxity myopia distinctive facial features narrow jaw heart murmur suspected mitral prolapse and dysautonomia. Her father is also described as having a similar habitus.
00379	LMIC	Male	See Below (Inconclusive)	joint hypermobility thoracic scoliosis arthritis of the hands and wrists tall stature and low weight aortic dilation multifocal heart murmur myopia astigmatism and hypothyroidism.	Full or partial overlap with indication for testing	SNV	COL6A1	21	47417660	47417660	c.1508G>A	Gly503Glu	Heterozygous	missense_variant	unknown (not detected in mother)	Collagen Type VI-Related Disorders	DOMINANT	Variant of Uncertain Significance
00351	LMIC	Female	NEGATIVE	includes severe skeletal malformations including asymmetric upper extremities and deformity of the femur on both legs hypotonia muscle weakness limited joint movement coarse facies and dysmorphic features. She also presents with alopecia areata precocious puberty tachycardia pericardial effusion and hypertrophic cardiomyopathy.
00334	HIC	Female	POSITIVE	developmental delay lack of expressive language obesity intermittent exotropia abnormal enamel development hypotonia erythematous skin skin folds increased subcutaneous tissue purplish feet mild dysmorphic features chronic constipation startle response to loud noises obstructive sleep apnea (which has now resolved) inability to stand unsupported and lack of mobility.	Full or partial overlap with indication for testing	copy_number_variation		X	139484271	149442579	1	Xq27-q28	Heterozygous	10 Mb	de novo	Disease Association NOS	X_LINKED	Pathogenic
00322	HIC	Female	See Below (Inconclusive)	includes hypotonia feeding difficulties and dysphagia with poor weight gain developmental delay including possible regression recurrent upper respiratory infections and mild obstructive sleep apnea. Her face is myopathic and asymmetric with a triangular shape and asymmetry of eye and ear size. Ophthalmologic findings include stable right-eye congenital ptosis bilateral astigmatism and bilateral a…	Full or partial overlap with indication for testing	copy_number_variation		12	107197584	109830564	1	12q23.3-q24.11	Heterozygous	2.6 Mb	de novo	Disease Association NOS	DOMINANT	Uncertain Clinical Significance
00371	HIC	Male	See Below (Inconclusive)	a phenotype that includes pins and needles" pain in the lower back muscle pain in the legs weakness and numbness following an episode of rhabdomyolysis. "	Full or partial overlap with indication for testing	SNV	RYR1	19	39016093	39016093	c.10562C>T	Ala3521Val	Heterozygous	missense_variant	paternal	Central Core Disease	DOMINANT	Variant of Uncertain Significance
00353	HIC	Male	NEGATIVE	includes cleft lip and palate developmental delay and a small ventricular septal defect. He is also noted to have feeding difficulties including oral aversion and oropharyngeal dysphagia. The proband father and proband's sister are noted to have a similar facial appearance including increased intercanthal distance and mild synophrys.
00333	HIC	Male	NEGATIVE	global developmental delay including speech delay facial dysmorphism exotropia amblyopia posteriorly rotated and cupped ears broad thumbs and large halluces. His other clinical findings include undescended testes orchiopexy repaired inguinal hernia recurrent otitis media abnormal dentition history of truncal hypotonia eczema incontinence and constipation.
00275	LMIC	Male	POSITIVE	macrocephaly prominent forehead low nasal bridge deeply grooved philtrum webbed neck with low posterior hairline down slanting palpebral fissures epicanthal folds hypertelorism webbed chest cubit valgus short stature pulmonary valve stenosis and left cryptorchidism.	Full or partial overlap with indication for testing	SNV	SOS1	2	39250269	39250269	c.1300G>A	Gly434Arg	Heterozygous	missense_variant	de novo	Noonan Syndrome	DOMINANT	Pathogenic
00342	HIC	Male	See Below (Inconclusive)	syndromic mild-moderate intellectual disability. He is described as having a Marfanoid habitus with several associated minor anomalies a mildly dilated aortic root with mild proximal left pulmonary artery stenosis mild optic nerve hypoplasia faint cortical cataracts facial capillary nevus single right palmar crease behavior concerns and a history of abnormal sleep cycles congenital hip dislocatio…	Full or partial overlap with indication for testing	SNV	ASXL2	2	25966615	25966615	c.2591A>C	Asn864Thr	Heterozygous	missense_variant	unknown (not detected in mother)	Shashi-Pena Syndrome	DOMINANT	Variant of Uncertain Significance
00342	HIC	Male	See Below (Inconclusive)	syndromic mild-moderate intellectual disability. He is described as having a Marfanoid habitus with several associated minor anomalies a mildly dilated aortic root with mild proximal left pulmonary artery stenosis mild optic nerve hypoplasia faint cortical cataracts facial capillary nevus single right palmar crease behavior concerns and a history of abnormal sleep cycles congenital hip dislocatio…	Full or partial overlap with indication for testing	insertion	ASXL2	2	25966614	25966614	c.2591_2592insC	Ile865TyrfsTer3	Heterozygous	frameshift_variant	unknown (not detected in mother)	Shashi-Pena Syndrome	DOMINANT	Variant of Uncertain Significance
00342	HIC	Male	See Below (Inconclusive)	syndromic mild-moderate intellectual disability. He is described as having a Marfanoid habitus with several associated minor anomalies a mildly dilated aortic root with mild proximal left pulmonary artery stenosis mild optic nerve hypoplasia faint cortical cataracts facial capillary nevus single right palmar crease behavior concerns and a history of abnormal sleep cycles congenital hip dislocatio…	Full or partial overlap with indication for testing	MNV	ASXL2	2	25966611	25966612	c.2594_2595delTAinsAC	Ile865Asn	Heterozygous	missense_variant	unknown (not detected in mother)	Shashi-Pena Syndrome	DOMINANT	Variant of Uncertain Significance
00314	LMIC	Male	POSITIVE	intellectual disability developmental delay absent speech hyperactivity aggressive behavior restless sleep growth restriction no pubertal development limited elbow extension constipation and dysmorphic features including a short philtrum a distinctive nose with a broad root and boxy nasal tip downturned corners of mouth high finger pads broad flat nails exotropia unusual hair pattern with a singl…	Full or partial overlap with indication for testing	SNV	GATAD2B	1	153792201	153792201	c.346C>T	Arg116Ter	Heterozygous	stop_gained	de novo	GATAD2B-Related Intellectual Disability Syndrome	DOMINANT	Pathogenic
00345	HIC	Female	NEGATIVE	lymphedema of the lower extremities small kidney and bicornuate uterus.
00436	HIC	Female	NEGATIVE	includes a diagnosis of epileptic encephalopathy with seizure activity first noted at 10 months of age different sized pupils abnormal arm movements failure to thrive with G-tube placement delayed bone age speech aphasia hypotonia poor balance and epicanthal folds. She has a similar phenotype to her maternal uncle who passed away when he was four years old.
00408	LMIC	Female	See Below (Inconclusive)	seizures that began at 4 months of age nystagmus ataxia and speech delay.	Full or partial overlap with indication for testing	insertion	CACNA1A	19	13410045	13410045	c.2376_2413dupCAGCCGGGAGGCCCTGTATAACGAAATGGACCCGGACG	Glu805AlafsTer28	Heterozygous	frameshift_variant	de novo	Early Infantile Epileptic Encephalopathy Autosomal Dominant	DOMINANT	Pathogenic
00412	LMIC	Female	POSITIVE	erythromelalgia and skeletal abnormalities including wide thorax short stature and short neck. Her other features include congenital hip dislocation ptosis midface hypoplasia and hypertelorism.	Full or partial overlap with indication for testing	SNV	SCN9A	2	167133791	167133791	c.2543T>C	Ile848Thr	Heterozygous	missense_variant	paternal	SCN9A-Related Peripheral Neuropathies Associated With Increased Pain	DOMINANT	Pathogenic
00437	HIC	Female	NEGATIVE	includes dysphagia gastroparesis with GJ dependence chronic constipation fasting intolerance with hypoglycemia poor growth hypotonia developmental delay (particularly speech/language) fatigue autonomic dysfunction with several episodes of syncope and a suspected mitochondrial disorder.
00405	LMIC	Male	POSITIVE	a Marfanoid habitus mild developmental delay mild plagiocephaly posteriorly rotated ears with overfolded helices and a railroad track appearance limited elbow extension and supination long hand and fingers absent distal interphalangeal creases adducted thumbs camptodactyly knee contractures and long feet and toes.	Full or partial overlap with indication for testing	SNV	FBN2	5	127674673	127674673	c.3424T>C	Cys1142Arg	Heterozygous	missense_variant	de novo	Congenital Contractural Arachnodactyly	DOMINANT	Pathogenic
00349	HIC	Male	NEGATIVE	includes proximal muscular atrophy of biceps and quadriceps elevated plasma creatine kinase levels stiffness and multiple contractures.
00283	HIC	Male	NEGATIVE	includes microcephaly intellectual disability developmental delay with speech delay clumsiness advanced bone age severe dysphagia and constipation strabismus hypoplasia of left temporal lobe and dysmorphic facial features including upslanting palpebral fissures broad nasal root big ears and full lips.
00341	HIC	Male	See Below (Inconclusive)	includes a history of developmental delays including speech delay and repetitive self-injurious behaviors. In addition sleep issues short stature otitis media and coarse unruly hair.	Full or partial overlap with indication for testing	copy_number_variation		18	38682015	40447305	1	18q12.3	Heterozygous	1.77 Mb	paternal	Disease Association NOS	DOMINANT	Uncertain Clinical Significance
00274	HIC	Male	See Below (Inconclusive)	includes bilateral postnatal overgrowth sensorineural deafness right ventricular hypertrophy pulmonary stenosis and neutropenia and thrombocytopenia in infancy. Dysmorphic features include broad nasal ridge/wide nasal root anteverted nares hypertelorism a bifid tip of the tongue short fingers and 4th finger clinodactyly on the left hand.	Full or partial overlap with indication for testing	SNV	COL11A1	1	103480071	103480071	c.1604C>G	Ala535Gly	Heterozygous	missense_variant	paternal	Stickler Syndrome Dominant	DOMINANT	Variant of Uncertain Significance
00413	LMIC	Male	POSITIVE	recurrent infections oral chronic candidiasis tuberculosis and cryptococcal meningitis.	Full or partial overlap with indication for testing	SNV	STAT1	2	191856021	191856021	c.970T>C	Cys324Arg	Heterozygous	missense_variant	de novo	Chronic Mucocutaneous Candidiasis Disease	DOMINANT	Likely Pathogenic
00339	HIC	Male	See Below (Inconclusive)	poor growth global developmental delays dysmorphic facial features hyperopic astigmatism ventriculomegaly mild right conductive hearing loss enlarged right vestibular aqueduct mild right choanal stenosis bilateral nasal cavity narrowing external ear anomalies ventricular septal defect patent ductus arteriosus eleven pairs of ribs constipation and eczema.	Full or partial overlap with indication for testing	SNV	FLG	1	152284886	152284886	c.2476C>T	Arg826Ter	Heterozygous	stop_gained	unknown	FLG-Related Disorders	DOMINANT	Variant of Uncertain Significance
00411	LMIC	Male	POSITIVE	includes a diagnosis of congenital methemoglobinemia. He is reported to have had late motor development and delayed speech and cannot read or write. He also presents with myopia and dysmorphic features including brachycephaly turricephaly short forehead bushy eyebrows strabismus nystagmus proptosis short and smooth philtrum flat midface and a short neck with acanthosis nigricans.	Full or partial overlap with indication for testing	SNV	CYB5R3	22	43015879	43015879	c.806C>T	Pro269Leu	Homozygous	missense_variant	maternal, unknown	Congenital methemoglobinemia	RECESSIVE	Likely Pathogenic
00402	LMIC	Female	POSITIVE	poor growth suggested to be consistent with her mothers history of a skeletal dysplasia. The proband is also noted to have upslanting palpebral fissures long eyelashes and flaring at her wrists.	Full or partial overlap with indication for testing	SNV	PHEX	X	22208620	22208620	c.1645+1G>A		Heterozygous	splice_donor_variant	maternal	X-Linked Hypophosphatemia	X_LINKED	Pathogenic
00403	LMIC	Female	POSITIVE	The proband has a clinical diagnosis of Marfan syndrome and her reported features include tall stature with dolichostenomelia arachnodactyly pes planus striae scoliosis joint hypermobility myopia and high intraocular pressure. Her older brother and father are also suspected to have Marfan syndrome.	Full or partial overlap with indication for testing	SNV	TGFB3	14	76437968	76437968	c.446C>A	Ala149Glu	Heterozygous	missense_variant	de novo	TGFB3-Related Connective Tissue Disorders	DOMINANT	Likely Pathogenic
00404	LMIC	Male	NEGATIVE	facial features suggestive of Marfan syndrome. No additional phenotypes are noted. His sister has a clinical diagnosis of Marfan syndrome and the father is also suspected to be affected.
00376	HIC	Male	See Below (Inconclusive)	cognitive delay/impairment ataxia chorea seizure disorder subcortical leukoencephalopathy cerebellar volume loss ventriculomegaly pineal lesion tremors tics dilated right atrium and ventricle strabismus hematochezia constipation microphallus delayed puberty obesity and various psychiatric concerns.	Full or partial overlap with indication for testing	SNV	DSP	6	7568785	7568785	c.1382T>C	Ile461Thr	Heterozygous	missense_variant	unknown (not detected in mother)	Arrhythmogenic Right Ventricular Cardiomyopathy	DOMINANT	Variant of Uncertain Significance
00376	HIC	Male	See Below (Inconclusive)	cognitive delay/impairment ataxia chorea seizure disorder subcortical leukoencephalopathy cerebellar volume loss ventriculomegaly pineal lesion tremors tics dilated right atrium and ventricle strabismus hematochezia constipation microphallus delayed puberty obesity and various psychiatric concerns.	Full or partial overlap with indication for testing	SNV	TTN	2	179437865	179437865	c.72994G>T	Val24332Phe	Heterozygous	missense_variant	unknown (not detected in mother)	Dilated Cardiomyopathy Dominant	DOMINANT	Variant of Uncertain Significance
00381	LMIC	Male	POSITIVE	congenital persistent hypotonia arthrogryposis with distal contractures muscle atrophy with necrosis of muscle fibers neuropathic changes on EMG paraplegia muscle weakness motor delays failure to thrive multiple pathological fractures through his life and some dysmorphic features including prominent lips turricephaly long face macrotia and a long thorax.	Full or partial overlap with indication for testing	SNV	TTN	2	179518019	179518019	c.38737G>T	Glu12913Ter	Heterozygous	stop_gained	maternal	Titinopathies	RECESSIVE	Pathogenic
00381	LMIC	Male	POSITIVE	congenital persistent hypotonia arthrogryposis with distal contractures muscle atrophy with necrosis of muscle fibers neuropathic changes on EMG paraplegia muscle weakness motor delays failure to thrive multiple pathological fractures through his life and some dysmorphic features including prominent lips turricephaly long face macrotia and a long thorax.	Full or partial overlap with indication for testing	insertion	TTN	2	179403510	179403510	c.99045_99046insCC	Thr33016ProfsTer46	Heterozygous	frameshift_variant	paternal	Titinopathies	RECESSIVE	Pathogenic
00384	HIC	Female	See Below (Inconclusive)	myopathy abnormal muscle biopsy muscle fasciculations joint laxity weight loss decreased subcutaneous fat chronic pancreatitis macrocytosis easy bruising poor healing livedo reticularis positive rheumatoid factor and lactic acidosis following exercise. Seizures hypothyroidism fibromyalgia anemia chronic kidney disease and elevated creatine kinase are also noted.	Full or partial overlap with indication for testing	SNV	VWF	12	6172156	6172156	c.1497G>C	Gln499His	Heterozygous	missense_variant	maternal	von Willebrand Disease	DOMINANT	Variant of Uncertain Significance
00407	LMIC	Female	NEGATIVE	microtia cardiac defects (including a VSD ASD and single ventricle) bilateral hearing loss more significant in the right ear than left and dysmorphic features including frontal prominence with depressed nasal bridge facial asymmetry including asymmetry of nares and cheeks short palpebral fissures down turned corners of the mouth fifth finger clinodactyly and a single transverse palmar crease. She…
00386	HIC	Female	See Below (Inconclusive)	neonatal hypotonia and feeding difficulties requiring G-tube placement. Her other phenotypic features include adducted thumb hypertelorism akinetic elevation of the palate and mild joint contractures of hands and feet.	Full or partial overlap with indication for testing	SNV	NEB	2	152359909	152359909	c.23894C>A	Thr7965Asn	Heterozygous	missense_variant	maternal	Nemaline Myopathy Recessive	RECESSIVE	Variant of Uncertain Significance
00410	LMIC	Male	See Below (Inconclusive)	a single right kidney short stature and congenital bilateral ptosis. His mother and brother also meet clinical diagnostic criteria for neurofibromatosis type 1.	Full or partial overlap with indication for testing	SNV	ZFHX4	8	77761362	77761362	c.3643C>G	Gln1215Glu	Heterozygous	missense_variant; splice_region_variant	paternal	Disease Association NOS	DOMINANT	Variant of Uncertain Significance
00410	LMIC	Male	See Below (Inconclusive)	a single right kidney short stature and congenital bilateral ptosis. His mother and brother also meet clinical diagnostic criteria for neurofibromatosis type 1.	Full or partial overlap with indication for testing	SNV	KMT2A	11	118373170	118373170	c.6563C>G	Ser2188Cys	Heterozygous	missense_variant	paternal	Wiedemann-Steiner Syndrome	DOMINANT	Variant of Uncertain Significance
00409	LMIC	Male	POSITIVE	several cafe au lait spots axillary and inguinal freckling Lisch nodules mild developmental delays and learning disabilities who meets the clinical diagnostic criteria for neurofibromatosis type 1. He also has congenital bilateral ptosis.	Full or partial overlap with indication for testing	SNV	NF1	17	29556166	29556166	c.2533T>C	Cys845Arg	Heterozygous	missense_variant	maternal	Neurofibromatosis Type 1	DOMINANT	Pathogenic
00409	LMIC	Male	POSITIVE	several cafe au lait spots axillary and inguinal freckling Lisch nodules mild developmental delays and learning disabilities who meets the clinical diagnostic criteria for neurofibromatosis type 1. He also has congenital bilateral ptosis.	Full or partial overlap with indication for testing	SNV	KMT2A	11	118373170	118373170	c.6563C>G	Ser2188Cys	Heterozygous	missense_variant	paternal	Wiedemann-Steiner Syndrome	DOMINANT	Variant of Uncertain Significance
00279	HIC	Female	NEGATIVE	neonatal jaundice polyhydramnios macrocephaly poor weight gain sacral dimple hypotonia pectus excavatum laryngomalacia left torticollis neck and core muscle weakness stridor mild frontal bossing broad forehead short neck deep palmer creases and diastasis recti.
00365	HIC	Male	See Below (Inconclusive)	intractable epilepsy central hypothyroidism short stature growth hormone deficiency developmental delays ADHD aggressive behavior chronic urticaria and idiopathic submundibular mass with a history of drainage.	Full or partial overlap with indication for testing	SNV	ROGDI	16	4852383	4852383	c.117G>T	Lys39Asn	Homozygous	missense_variant; splice_region_variant	maternal, unknown	Kohlschutter-Tonz syndrome	RECESSIVE	Variant of Uncertain Significance
00365	HIC	Male	See Below (Inconclusive)	intractable epilepsy central hypothyroidism short stature growth hormone deficiency developmental delays ADHD aggressive behavior chronic urticaria and idiopathic submundibular mass with a history of drainage.	Full or partial overlap with indication for testing	SNV	ABCG8	2	44099233	44099233	c.1083G>A	Trp361Ter	Homozygous	stop_gained	maternal, unknown	Sitosterolemia	RECESSIVE	Pathogenic
00277	HIC	Male	POSITIVE	requiring mechanical ventilation for 10 days at birth due to apneic episodes and breathing deterioration severe hypotonia (particularly of facial and swallowing muscles) limited functional movement of the limbs (proximal muscles most severely impacted tone progressively improves distally) bilateral blindness with extreme ophthalmoplegia and a nasogastric tube.	Full or partial overlap with indication for testing	copy_number_variation	RYR1	19	38988140	38992568	1	19q13.2	Heterozygous	4.4 kb	maternal	minicore myopathy with ophthalmoplegia	RECESSIVE	Likely Pathogenic
00277	HIC	Male	POSITIVE	requiring mechanical ventilation for 10 days at birth due to apneic episodes and breathing deterioration severe hypotonia (particularly of facial and swallowing muscles) limited functional movement of the limbs (proximal muscles most severely impacted tone progressively improves distally) bilateral blindness with extreme ophthalmoplegia and a nasogastric tube.	Full or partial overlap with indication for testing	SNV	RYR1	19	39025414	39025414	c.11314C>T	Arg3772Trp	Heterozygous	missense_variant	paternal	minicore myopathy with ophthalmoplegia	RECESSIVE	Likely Pathogenic
00373	HIC	Male	See Below (Inconclusive)	global developmental delays including language and motor delay hypotonia dysmorphic facial features short broad and tapered fingers fifth finger clinodactyly and a history of hypospadias and cryptorchidism. Both of his parents are reported to have histories of learning disabilities.	Full or partial overlap with indication for testing	SNV	AHDC1	1	27875080	27875080	c.3547C>T	Arg1183Trp	Heterozygous	missense_variant	paternal	Xia-Gibbs syndrome	DOMINANT	Variant of Uncertain Significance
00373	HIC	Male	See Below (Inconclusive)	global developmental delays including language and motor delay hypotonia dysmorphic facial features short broad and tapered fingers fifth finger clinodactyly and a history of hypospadias and cryptorchidism. Both of his parents are reported to have histories of learning disabilities.	Full or partial overlap with indication for testing	SNV	KMT2C	7	151896463	151896463	c.4174C>G	Gln1392Glu	Heterozygous	missense_variant	paternal	KMT2C-Related Disorders	DOMINANT	Variant of Uncertain Significance
00329	HIC	Female	NEGATIVE	includes a history of petechiae mainly in the mucosal areas easy bruising urticaria pigmentosa angioedema and hypogammaglobulinemia. She is also noted to have macrocephaly migraines dysphagia GERD abdominal pain and irritable bowel syndrome hearing loss in the right ear asthma allergies and myofascial pain in the hips and legs.
00329	HIC	Female	NEGATIVE	includes a history of petechiae mainly in the mucosal areas easy bruising urticaria pigmentosa angioedema and hypogammaglobulinemia. She is also noted to have macrocephaly migraines dysphagia GERD abdominal pain and irritable bowel syndrome hearing loss in the right ear asthma allergies and myofascial pain in the hips and legs.	Secondary Finding	SNV	APC	5	112175211	112175211	c.3920T>A	Ile1307Lys	Heterozygous	missense_variant				Pathogenic
00327	HIC	Female	POSITIVE	includes hypotonia motor and speech delay increased sleep fatigue and muscle weakness. She is also noted to have bilateral clonus when she is sleeping.	Full or partial overlap with indication for testing	deletion	GRIN2B	12	13768588	13768592	c.1335_1338delAACA	Asp447ArgfsTer25	Heterozygous	frameshift_variant	de novo	GRIN2B-Related Neurodevelopmental Disorder	DOMINANT	Pathogenic
00246	HIC	Female	POSITIVE	severe developmental delay and regression sensory processing disorder very high pain threshold stereotypic movements prognathism bilateral epicanthus and acute lymphoblastic leukemia.	Full or partial overlap with indication for testing	insertion	SHANK3	22	51159932	51159932	c.3642dupG	Pro1215AlafsTer?	Heterozygous	frameshift_variant	de novo	Phelan-McDermid Syndrome	DOMINANT	Pathogenic
00441	HIC	Female	POSITIVE	multiple congenital anomalies including syndactyly of the hands and feet hydronephrosis external hydrocephalus dysmorphic craniofacial features retrognathia micrognathia butterfly vertebrae anteriorly placed anus and ventriculomegaly.	Full or partial overlap with indication for testing	deletion	PHF6				c.823_825delGGA	Gly275del	Heterozygous	inframe_deletion	de novo	Borjeson-ForssmanLehmann syndrome	X_LINKED	Pathogenic
00441	HIC	Female	POSITIVE	multiple congenital anomalies including syndactyly of the hands and feet hydronephrosis external hydrocephalus dysmorphic craniofacial features retrognathia micrognathia butterfly vertebrae anteriorly placed anus and ventriculomegaly.	Full or partial overlap with indication for testing	SNV	NOTCH2	1	120529621	120529621	c.836T>G	Val279Gly	Heterozygous	missense_variant	paternal	Alagille Syndrome	DOMINANT	Variant of Uncertain Significance
00331	HIC	Female	POSITIVE	developmental delay excessive somnolence hearing loss poor feeding poor growth tachypnea apneic episodes and dysmorphic features of low set ears thick ear lobes upslanting palpebral fissures hypertelorism long philtrum and micrognathia.	Full or partial overlap with indication for testing	copy_number_variation		22	18757759	21484328	3	22q11.2	Heterozygous	2.7 Mb	maternal	22q11.2 Duplication Syndrome	DOMINANT	Pathogenic
00393	HIC	Male	NEGATIVE	developmental delay hypermobile joints joint pain spontaneous subluxation of the knee shoulder ankle wrist elbow and hips esotropia chalazion of the right lower eyelid Ehlers-Danlos syndrome frequent falls and food allergies.
00356	HIC	Male	POSITIVE	hip dysplasia with wide acetabulum and irregular contour of the bone bilaterally hip and knee arthralgia particularly with exercise or prolonged activity stiff gait short stature and mild shortening of the limbs.	Full or partial overlap with indication for testing	SNV	COMP	19	18896861	18896861	c.1403G>C	Cys468Ser	Heterozygous	missense_variant	maternal	Multiple Epiphyseal Dysplasia Dominant	DOMINANT	Likely Pathogenic
00374	HIC	Male	NEGATIVE	includes a seizure disorder intellectual disability and developmental regression. In addition the proband has macrocephaly hypotonia hypertelorism abnormal gait fatigues easily and has had repeated pneumonia.
00323	HIC	Male	NEGATIVE	bilateral renal cystic disease and echogenic kidneys dysphagia tonsillar hypertrophy hoarseness bilateral myopia with astigmatism anisometropia amblyopia of left eye exotropia global developmental delay gastroesophageal reflux speech or language delay vocal cord paralysis PFO mild right ventricular hypertrophy retinopathy of prematurity microphallus and a history of neutropenia and thrombocytopen…
00382	HIC	Female	POSITIVE	pulmonary hypertension cleft palate mild micrognathia prominent forehead high triglycerides and a history of 2-vessel cord prenatally.	Full or partial overlap with indication for testing	copy_number_variation		1	103446394	105602157	1	1p21.1	Heterozygous	2.2 Mb	maternal	Disease Association NOS	DOMINANT	Uncertain Clinical Significance
00382	HIC	Female	POSITIVE	pulmonary hypertension cleft palate mild micrognathia prominent forehead high triglycerides and a history of 2-vessel cord prenatally.	Full or partial overlap with indication for testing	copy_number_variation		X	60000?	155234966delmos?	1	Xq22.1	Heterozygous	155.1 Mb	de novo	Turner Syndrome	X_LINKED	Pathogenic
00382	HIC	Female	POSITIVE	pulmonary hypertension cleft palate mild micrognathia prominent forehead high triglycerides and a history of 2-vessel cord prenatally.	Full or partial overlap with indication for testing	copy_number_variation		X	32578319	32620638	3	Xp21.1	Heterozygous	42 kb	maternal	Dystrophinopathies	X_LINKED	Pathogenic
00278	HIC	Female	POSITIVE	hydrops fetalis abdominal ascites and was born prematurely. She also has a history of retinopathy of prematurity broncopulmonary dysplasia hypothyroidism developmental delay coagulopathy tethered cord cervical myopathy with fatty deposits T-lymphocyte deficiency lymphedema hypogammaglobulinemia subglottic stenosis tracheomalacia poor growth bicoronal craniosynostosis macrocephaly and small ear ca…	Full or partial overlap with indication for testing	copy_number_variation		4	131303316	168722402	3	4q28.3-q32.3	Heterozygous	37.4 Mb	de novo	4q Duplication Syndrome	DOMINANT	Pathogenic
00366	HIC	Female	See Below (Inconclusive)	includes developmental delay focal seizures intellectual disability expressive language delay ADHD hypotonia a history of constipation and esotropia.	Full or partial overlap with indication for testing	SNV	CHD8	14	21871676	21871676	c.3454G>A	Val1152Ile	Heterozygous	missense_variant	maternal	Autism Spectrum Disorder	DOMINANT	Variant of Uncertain Significance
00366	HIC	Female	See Below (Inconclusive)	includes developmental delay focal seizures intellectual disability expressive language delay ADHD hypotonia a history of constipation and esotropia.	Full or partial overlap with indication for testing	SNV	NLGN3	X	70389561	70389561	c.2101C>T	Leu701Phe	Heterozygous	missense_variant	maternal	Complex neurodevelopmental disorder	X_LINKED	Variant of Uncertain Significance
00340	LMIC	Female	POSITIVE	microcephaly developmental delay generalized muscle atrophy right hemiparesis cerebellar hypoplasia cerebral atrophy and minor dysmorphic features.	Full or partial overlap with indication for testing	SNV	CASK	X	41428924	41428924	c.1579C>T	Gln527Ter	Heterozygous	stop_gained	de novo	Mental retardation and microcephaly with pontine and cerebellar hypoplasia	DOMINANT	Pathogenic
00383	HIC	Male	POSITIVE	multiple congenital anomalies developmental delay repetitive behavior hyperphagia obesity with abnormal fat distribution acanthosis nigricans sleep apnea hypogonadism stool and urinary incontinence ichthyosis and North Carolina macular dystrophy	Full or partial overlap with indication for testing	SNV	FLG	1	152284886	152284886	c.2476C>T	Arg826Ter	Heterozygous	stop_gained	paternal	FLG-Related Disorders	DOMINANT	Variant of Uncertain Significance
00383	HIC	Male	POSITIVE	multiple congenital anomalies developmental delay repetitive behavior hyperphagia obesity with abnormal fat distribution acanthosis nigricans sleep apnea hypogonadism stool and urinary incontinence ichthyosis and North Carolina macular dystrophy	Full or partial overlap with indication for testing	copy_number_variation		X	6451623	8136851	0	Xp22.31	Hemizygous	1.7 Mb	maternal	Xp22.31 deletion	X_LINKED	Pathogenic
00348	HIC	Male	See Below (Inconclusive)	global developmental delay including speech and motor delays hypotonia microcephaly abnormal head shape Chiari I malformation exotropia mild facial dysmorphic features fetal pads GERD dysphagia drooling constipation and failure to thrive. His other features include history of hand flapping and chewing failing eye tracking and eye contact and neonatal respiratory distress.	Full or partial overlap with indication for testing	SNV	KMT2C	7	151874697	151874697	c.7841G>A	Gly2614Asp	Heterozygous	missense_variant	unknown (not detected in mother)	KMT2C-Related Disorders	DOMINANT	Variant of Uncertain Significance
00364	HIC	Male	NEGATIVE	muscle wasting with elevated CK levels muscle atrophy distal limb muscle weakness gait abnormalities reduced deep tendon reflexes and a positive Gower sign with EMG findings suggesting chronic sensorimotor polyneuropathy and distal muscle disease.
00440	HIC	Female	POSITIVE	global developmental delay including speech and motor delays hypotonia poor head control failure to thrive congenital bilateral hearing loss pectus excavatum and facial dysmorphisms including upslanting palpebral fissures upturned nose posteriorly rotated ears high palate and retrognathia.	Full or partial overlap with indication for testing	deletion	ASXL1	20	31022968	31022969	c.2456delG	Gly819GlufsTer5	Heterozygous	frameshift_variant	de novo	Bohring-Opitz Syndrome	DOMINANT	Pathogenic
00280	HIC	Female	POSITIVE	a history of failure to thrive and global developmental delay including delayed motor skills and absent verbal skills. The proband also presents with dysmorphic features including brachycephaly short downslanting palpebral fissures right-sided facial asymmetry a small asymmetric nose right-sided ptosis and low set posteriorly rotated ears. In addition the proband is noted to have hypotonia bilate…	Full or partial overlap with indication for testing	SNV	TRIO	5	14487817	14487817	c.7080G>C	Gln2360His	Heterozygous	missense_variant	maternal	TRIO-Related Intellectual Disability	DOMINANT	Variant of Uncertain Significance
00280	HIC	Female	POSITIVE	a history of failure to thrive and global developmental delay including delayed motor skills and absent verbal skills. The proband also presents with dysmorphic features including brachycephaly short downslanting palpebral fissures right-sided facial asymmetry a small asymmetric nose right-sided ptosis and low set posteriorly rotated ears. In addition the proband is noted to have hypotonia bilate…	Full or partial overlap with indication for testing	copy_number_variation		10	48301535	51807296	3	10q11.22-q11.23	Heterozygous	3.5 Mb	maternal	10q11.22q11.23 duplication	DOMINANT	Pathogenic
00280	HIC	Female	POSITIVE	a history of failure to thrive and global developmental delay including delayed motor skills and absent verbal skills. The proband also presents with dysmorphic features including brachycephaly short downslanting palpebral fissures right-sided facial asymmetry a small asymmetric nose right-sided ptosis and low set posteriorly rotated ears. In addition the proband is noted to have hypotonia bilate…	Full or partial overlap with indication for testing	copy_number_variation	RAC1	7	6406506	6466407	1	7p22.1	Heterozygous	60 kb	maternal	RAC1-Related Intellectual Disability	DOMINANT	Uncertain Clinical Significance
00355	LMIC	Male	NEGATIVE	spastic paraplegia hypertonia muscle atrophy poor posture control tongue protrusion sialorrhea and global developmental delay including absent speech and motor delay.
00395	HIC	Male	POSITIVE	facial hypomimia and asymmetry microcephaly hypertelorism micrognathia down-slanting palpebral fissures long eyelashes low-set ears arachnodactyly clenched fists postural asymmetry with a preferentially left-rotated head vocal cord paresis and abnormal brain imaging that includes impairment of the brainstem and asymmetry of the frontal horns.	Full or partial overlap with indication for testing	SNV	TUBB3	16	90001644	90001644	c.785G>A	Arg262His	Heterozygous	missense_variant	unknown	TUBB3-Related Tubulinopathy	DOMINANT	Pathogenic
00395	HIC	Male	POSITIVE	facial hypomimia and asymmetry microcephaly hypertelorism micrognathia down-slanting palpebral fissures long eyelashes low-set ears arachnodactyly clenched fists postural asymmetry with a preferentially left-rotated head vocal cord paresis and abnormal brain imaging that includes impairment of the brainstem and asymmetry of the frontal horns.	Full or partial overlap with indication for testing	SNV	CREBBP	16	3823798	3823798	c.2417T>C	Met806Thr	Heterozygous	missense_variant	unknown	Rubinstein-Taybi Syndrome	DOMINANT	Variant of Uncertain Significance
00443	HIC	Female	NEGATIVE	early-onset myoclonus and a paternal family history of myoclonus. She is also described to have attention deficit hyperactivity disorder thyroiditis irregular menstrual cycle and celiac disease.
00276	HIC	Male	See Below (Inconclusive)	skeletal dysplasia short stature intrauterine growth restriction growth deficiency microcephaly hydrocephalus macroglossia developmental delay intellectual disability salt and pepper retinopathy abnormal macula hyperopia microcornea bilateral conductive hearing loss intermittent asthma sparse and brittle hair prominent musculature with little subcutaneous fat kyphoscoliosis limited exercise toler…	Full or partial overlap with indication for testing	SNV	DIAPH3	13	60686177	60686177	c.357G>C	Glu119Asp	Heterozygous	missense_variant	paternal	auditory neuropathy	DOMINANT	Variant of Uncertain Significance
00276	HIC	Male	See Below (Inconclusive)	skeletal dysplasia short stature intrauterine growth restriction growth deficiency microcephaly hydrocephalus macroglossia developmental delay intellectual disability salt and pepper retinopathy abnormal macula hyperopia microcornea bilateral conductive hearing loss intermittent asthma sparse and brittle hair prominent musculature with little subcutaneous fat kyphoscoliosis limited exercise toler…	Full or partial overlap with indication for testing	SNV	DKC1	X	153991099	153991099	c.-142C>G		Hemizygous	5_prime_UTR_variant	maternal	Dyskeratosis Congenita X-Linked	X_LINKED	Variant of Uncertain Significance
00276	HIC	Male	See Below (Inconclusive)	skeletal dysplasia short stature intrauterine growth restriction growth deficiency microcephaly hydrocephalus macroglossia developmental delay intellectual disability salt and pepper retinopathy abnormal macula hyperopia microcornea bilateral conductive hearing loss intermittent asthma sparse and brittle hair prominent musculature with little subcutaneous fat kyphoscoliosis limited exercise toler…	Full or partial overlap with indication for testing	SNV	GPKOW	X	48970808	48970808	c.1279G>C	Gly427Arg	Hemizygous	missense_variant	de novo	Disease Association NOS	X_LINKED	Variant of Uncertain Significance
00332	HIC	Female	POSITIVE	developmental delay absent speech seizures congenital hypotonia unsteady gait and mild oral dysphagia.	Incidental Finding	deletion	DICER1	14	95562346	95562348	c.4909_4910delTC	Ser1637GlyfsTer14	Heterozygous	frameshift_variant	de novo	DICER1-related tumor susceptibility syndrome	DOMINANT	Likely Pathogenic
00332	HIC	Female	POSITIVE	developmental delay absent speech seizures congenital hypotonia unsteady gait and mild oral dysphagia.	Full or partial overlap with indication for testing	SNV	SMC1A	X	53436043	53436043	c.1495C>T	Arg499Ter	Heterozygous	stop_gained	de novo	SMC1A-related cohesinopathy	X_LINKED	Pathogenic
00388	HIC	Male	NEGATIVE	regression from three years of age developmental delay intellectual disability language impairment with absent speech attention deficit hyperactivity disorder sensory processing issues behavioral concerns including hyperactivity being withdrawn and self-injurious behavior (biting himself and head banging) stereotypical repetitive behaviors (including rocking hand flapping complex movements with f…
00450	HIC	Male	NEGATIVE	This probands report phenotype includes enlarged lymph nodes ~10 lipomas fainting in heat fever and chills after minor exercise gastroesophageal reflux disease dyspepsia severe pain in his foot back abdomen and neck diffuse muscle cramps and spasms loose oily stools androgen excess vitamin D deficiency paresthesia of skin hypercalcemia constipation insomnia dizziness and giddiness nausea and vomi…
00389	HIC	Female	POSITIVE	bilateral clubbed feet microcephaly poor head control hypotonia malrotated left kidney and hearing loss. Abnormal facial features plagiocephaly high arched palate exotropia and epiblepharon in the right eye and a hairy sacral patch are also noted. Brain MRI findings suggest moderate diffuse white matter loss and possible hypoplasia or absence of cochlear nerves.	Full or partial overlap with indication for testing	SNV	POGZ	1	151378576	151378576	c.2935C>T	Arg979Ter	Heterozygous	stop_gained	de novo	White-Sutton syndrome	DOMINANT	Pathogenic
00297	HIC	Male	NEGATIVE	early-onset myoclonus dystonia and cerebral ataxia and a paternal family history of myoclonus. His brother father and paternal female first cousin are described to have similar features.
00446	HIC	Male	See Below (Inconclusive)	epilepsy receptive and expressive language disorder intellectual disability autism ADD/ADHD stereotypical behaviors tics and poor sleep. Additional features include hypotonia advanced bone age weight loss decreased appetite anxiety depression elevated amino acids carnitine deficiency and vitamin D deficiency.	Full or partial overlap with indication for testing	SNV	CHRNA2	8	27320606	27320606	c.1354G>T	Glu452Ter	Heterozygous	stop_gained	paternal	Nocturnal Frontal Lobe Epilepsy	DOMINANT	Variant of Uncertain Significance
00446	HIC	Male	See Below (Inconclusive)	epilepsy receptive and expressive language disorder intellectual disability autism ADD/ADHD stereotypical behaviors tics and poor sleep. Additional features include hypotonia advanced bone age weight loss decreased appetite anxiety depression elevated amino acids carnitine deficiency and vitamin D deficiency.	Full or partial overlap with indication for testing	SNV	CACNA1D	3	53699828	53699828	c.908T>C	Phe303Ser	Heterozygous	missense_variant	maternal	CACNA1D-Related Neurodevelopmental and Endocrine Disorders	DOMINANT	Variant of Uncertain Significance
00446	HIC	Male	See Below (Inconclusive)	epilepsy receptive and expressive language disorder intellectual disability autism ADD/ADHD stereotypical behaviors tics and poor sleep. Additional features include hypotonia advanced bone age weight loss decreased appetite anxiety depression elevated amino acids carnitine deficiency and vitamin D deficiency.	Full or partial overlap with indication for testing	SNV	CNNM2	10	104816648	104816648	c.2000A>G	Lys667Arg	Heterozygous	missense_variant	paternal	CNNM2-related neurodevelopmental disorder and hypomagnesemia	DOMINANT	Variant of Uncertain Significance
00397	HIC	Female	See Below (Inconclusive)	includes sudden onset of generalized amplified pain syndrome characterized by neuropathic pain generalized deep bone pain and amplified musculoskeletal pain. She is reported to have a history of migraines strabismus chronic fatigue vitamin D deficiency elevated vitamin B6 levels and low ALP macrocephaly white matter abnormality in brain MRI left atrial dilation high left atrial pressure and hyper…	Incidental Finding	SNV	CHEK2	22	29121087	29121087	c.599T>C	Ile200Thr	Heterozygous	missense_variant	maternal	CHEK2-Related Cancer Susceptibility	DOMINANT	Pathogenic
00390	HIC	Male	See Below (Inconclusive)	autism spectrum disorder lack of speech frustration aggressive combative behavior and poor eye contact. He eats a regular diet but is particular about food not yet potty trained has eczema but no dysmorphic features.	Full or partial overlap with indication for testing	SNV	PTCH1	9	98229529	98229529	c.2429C>T	Ala810Val	Heterozygous	missense_variant	maternal	PTCH1-related disorders	DOMINANT	Variant of Uncertain Significance
00326	HIC	Female	See Below (Inconclusive)	includes global developmental delay including fine motor skill and gross motor delay as well speech delay. MRI imaging noted delayed myelination diffuse mild volume loss and underdevelopment of the corpus callosum. The proband also presents with hypotonia mild obstructive sleep apnea paroxysmal spells dysphagia feeding difficulties chronic constipation history of reflux a subtle chorea and poster…	Full or partial overlap with indication for testing	SNV	TRIO	5	14336687	14336687	c.1897C>G	Gln633Glu	Heterozygous	missense_variant	unknown	TRIO-Related Intellectual Disability	DOMINANT	Variant of Uncertain Significance
00396	HIC	Male	NEGATIVE	multiple congenital anomalies including contractures shorter fingers and toes large and abducted thumbs small stature prominent heels flat face micrognathia retrognathia coloboma bilateral dysplastic discs myoptic astigmatism and a low anterior hairline. He is also noted to have a history of intrauterine growth retardation failure to thrive hypotonia ventricular septal defect multifocal seizures …
00484	HIC	Female	NEGATIVE	a history of autism spectrum disorder attention deficit disorder pervasive developmental delay with a history of regression sensory disorganization facial tics right sided ptosis and a capillary hemangioma.
00444	HIC	Male	NEGATIVE	autism spectrum disorder poor gross and fine motor skills fifth finger clinodactyly left hand single palmar crease and several cafe-au-lait spots.
00391	HIC	Female	NEGATIVE	congenital kyphoscoliosis that has progressed with age a bell-shaped thorax chronic restrictive lung disease short stature coarse facial features short neck coarse hair texture delayed onset of puberty and a history of amblyopia and ptosis.
00372	HIC	Female	POSITIVE	myopathic facies with ptosis and inability to raise her eyebrows fully close her eyes or smile. She is also noted to have developmental delay hypotonia upper extremity weakness noticeable lordosis when walking joint laxity poor growth short stature velopharyngeal insufficiency dysarthria short palate low-set ears with prominent helices and cafe-au-lait spots.	Full or partial overlap with indication for testing	SNV	MYMK	9	136384124	136384124	c.271C>A	Pro91Thr	Heterozygous	missense_variant	maternal	Carey-Fineman-Ziter Syndrome	RECESSIVE	Pathogenic
00372	HIC	Female	POSITIVE	myopathic facies with ptosis and inability to raise her eyebrows fully close her eyes or smile. She is also noted to have developmental delay hypotonia upper extremity weakness noticeable lordosis when walking joint laxity poor growth short stature velopharyngeal insufficiency dysarthria short palate low-set ears with prominent helices and cafe-au-lait spots.	Full or partial overlap with indication for testing	SNV	MYMK	9	136380648	136380648	c.481G>C	Gly161Arg	Heterozygous	missense_variant	paternal	Carey-Fineman-Ziter Syndrome	RECESSIVE	Variant of Uncertain Significance
00286	HIC	Female	NEGATIVE	alopecia totalis dystrophic nails abnormal dentition hypohidrosis dry skin which is particularly pronounced on the palms and soles bilateral fifth finger clinodactyly and brachydactyly recurrent urinary tract infections tremors; a history of neonatal jaundice elevated transaminase elevated lactic acid dehydrogenase and speech delay all of which have resolved.
00385	HIC	Female	See Below (Inconclusive)	seizures congenital cataracts developmental delay hypotonia and decreased head control and head lag. She also presents with a smooth philtrum thin upper lip posteriorly rotated ears small palpebral fissures peripheral pulmonic stenosis nystagmus and strabismus. She has a history of asymmetric intrauterine growth restriction failure to thrive with feeding difficulties in the newborn period and a f…	Full or partial overlap with indication for testing	SNV	SUOX	12	56397995	56397995	c.822G>C	Gln274His	Homozygous	missense_variant	both	Isolated Sulfite Oxidase Deficiency	RECESSIVE	Variant of Uncertain Significance
00483	HIC	Female	NEGATIVE	includes attention deficit disorder autism spectrum disorder speech and language delay sensory disorder (unspecified disturbances of skin sensation) anxiety allergic rhinitis and low iron levels.
00161	HIC	Male	NEGATIVE	recurrent hemophagocytic lymphohistiocytosis flares stage III chronic kidney disease nephrotic syndrome due to C1q nephropathy with persistent proteinuria hypertension hyperparathyroidism pancytopenia and platelet dysfunction a gastrointestinal bleed and reduced cognitive function.
00425	HIC	Female	POSITIVE	includes bilateral cleft palate global developmental delay severe intellectual disability small corpus callosum ophthalmologic abnormalities triangular face strabismus hypertelorism EEG abnormalities dental overcrowding hypochromic and cafe au lait spots mandibular hypoplasia/micrognathia microcephaly and bilateral congenital varus metatarsal. His height and weight are noted to be in the 10th per…	Full or partial overlap with indication for testing	deletion	SATB2	2	200137154	200137157	c.1979_1981delTCA	Ile660del	Heterozygous	inframe_deletion	de novo	SATB2-associated syndrome	DOMINANT	Pathogenic
00425	HIC	Female	POSITIVE	includes bilateral cleft palate global developmental delay severe intellectual disability small corpus callosum ophthalmologic abnormalities triangular face strabismus hypertelorism EEG abnormalities dental overcrowding hypochromic and cafe au lait spots mandibular hypoplasia/micrognathia microcephaly and bilateral congenital varus metatarsal. His height and weight are noted to be in the 10th per…	Full or partial overlap with indication for testing	SNV	DPM1	20	49551673	49551673	c.779C>T	Thr260Ile	Homozygous	missense_variant	both	Congenital disorders of glycosylation type Ie	RECESSIVE	Variant of Uncertain Significance
00424	HIC	Male	See Below (Inconclusive)	a history of developmental delay hypotonia muscle weakness reduced reflexes seizures respiratory insufficiency and feeding difficulties. Additional features include contractures of both hands; rocker bottom feet and right clubfoot; left undescended testis and right testicular hydrocele; mild renal dilation; small patent foramen ovale patent ductus arteriosus and atrial septal defect; and subtle d…	Full or partial overlap with indication for testing	SNV	EZH2	7	148544347	148544347	c.44G>T	Trp15Leu	Heterozygous	missense_variant	maternal	Weaver Syndrome	DOMINANT	Variant of Uncertain Significance
00424	HIC	Male	See Below (Inconclusive)	a history of developmental delay hypotonia muscle weakness reduced reflexes seizures respiratory insufficiency and feeding difficulties. Additional features include contractures of both hands; rocker bottom feet and right clubfoot; left undescended testis and right testicular hydrocele; mild renal dilation; small patent foramen ovale patent ductus arteriosus and atrial septal defect; and subtle d…	Full or partial overlap with indication for testing	SNV	FANCD2	3	10102066	10102066	c.1745C>T	Ala582Val	Heterozygous	missense_variant	maternal	Fanconi Anemia	RECESSIVE	Variant of Uncertain Significance
00424	HIC	Male	See Below (Inconclusive)	a history of developmental delay hypotonia muscle weakness reduced reflexes seizures respiratory insufficiency and feeding difficulties. Additional features include contractures of both hands; rocker bottom feet and right clubfoot; left undescended testis and right testicular hydrocele; mild renal dilation; small patent foramen ovale patent ductus arteriosus and atrial septal defect; and subtle d…	Full or partial overlap with indication for testing	SNV	FANCD2	3	10094075	10094075	c.1550T>C	Ile517Thr	Heterozygous	missense_variant	paternal	Fanconi Anemia	RECESSIVE	Variant of Uncertain Significance
00477	HIC	Female	POSITIVE	includes developmental delays including motor and speech delays intellectual disability memory loss staring spells complex partial seizures and abnormal brain MRI imaging showing moderate diffuse brain atrophy and mildly delayed myelination. She also presents with multiple facial dysmorphic features progressive bilateral cavovarus foot deformity multiple hemivertebrae short cervical ribs microcep…	Full or partial overlap with indication for testing	SNV	TAF1	X	70608626	70608626	c.2668C>T	Arg890Cys	Heterozygous	missense_variant	de novo	TAF1-Related Syndromic Intellectual Disability	X_LINKED	Likely Pathogenic
00431	HIC	Male	See Below (Inconclusive)	a severe respiratory deficit and inability to sustain spontaneous breathing tremor of the limbs rigidity of the legs hypotonia brain abnormalities and minimal hydronephrosis.	Full or partial overlap with indication for testing	SNV	LRPPRC	2	44174921	44174921	c.1921-7A>G		Heterozygous	splice_region_variant; intron_variant	maternal	Leigh Syndrome French-Canadian Type	RECESSIVE	Variant of Uncertain Significance
00431	HIC	Male	See Below (Inconclusive)	a severe respiratory deficit and inability to sustain spontaneous breathing tremor of the limbs rigidity of the legs hypotonia brain abnormalities and minimal hydronephrosis.	Full or partial overlap with indication for testing	SNV	LRPPRC	2	44174419	44174419	c.2056A>G	Ile686Val	Heterozygous	missense_variant	paternal	Leigh Syndrome French-Canadian Type	RECESSIVE	Variant of Uncertain Significance
00482	HIC	Female	NEGATIVE	developmental delay with regression autism speech delay sleep abnormalities history of rashes on trunk and inflammation and a history of two febrile seizures after MMR vaccine. An abnormal EEG was noted to show sporadic right hemispheric discharges with follow-up brain MRI showing no significant findings.
00438	HIC	Female	NEGATIVE	includes ocular albinism congenital nystagmus foveal hypoplasia blonde fundi and translucent irides. The probands mother also has a clinical diagnosis of ocular albinism.
00458	HIC	Male	POSITIVE	The epilepsy encephalopathy expressive and receptive speech delay dysarthria mild tremor attention deficit hyperactivity disorder features consistent with autism spectrum disorder hypertelorism downward slanting palpebral fissures lateral eyebrow flaring and prominent ears.	Full or partial overlap with indication for testing	SNV	SCN8A	12	52180390	52180390	c.4007T>C	Ile1336Thr	Heterozygous	missense_variant	de novo	SCN8A-related epilepsy with encephalopathy	DOMINANT	Likely Pathogenic
00522	HIC	Male	POSITIVE	a diagnosis of Becker muscular dystrophy with dependence on a wheelchair muscle weakness clumsiness fatigue elevated serum creatine kinase developmental delay with speech delay/minimal speech intellectual disability seizures/epilepsy with abnormal EEG ataxia decreased pain sensitivity hypothyroidism airway clearance impairment astigmatism hyperopia pseudoesotropia snoring drooling diurnal enuresi…	Full or partial overlap with indication for testing	SNV	ARX	X	25031675	25031675	c.437C>T	Ala146Val	Hemizygous	missense_variant	unknown	ARX-related disorders	X_LINKED	Variant of Uncertain Significance
00522	HIC	Male	POSITIVE	a diagnosis of Becker muscular dystrophy with dependence on a wheelchair muscle weakness clumsiness fatigue elevated serum creatine kinase developmental delay with speech delay/minimal speech intellectual disability seizures/epilepsy with abnormal EEG ataxia decreased pain sensitivity hypothyroidism airway clearance impairment astigmatism hyperopia pseudoesotropia snoring drooling diurnal enuresi…	Full or partial overlap with indication for testing	SNV	SHH	7	155604696	155604696	c.121C>G	Pro41Ala	Heterozygous	missense_variant	unknown	Holoprosencephaly spectrum disorder	DOMINANT	Variant of Uncertain Significance
00522	HIC	Male	POSITIVE	a diagnosis of Becker muscular dystrophy with dependence on a wheelchair muscle weakness clumsiness fatigue elevated serum creatine kinase developmental delay with speech delay/minimal speech intellectual disability seizures/epilepsy with abnormal EEG ataxia decreased pain sensitivity hypothyroidism airway clearance impairment astigmatism hyperopia pseudoesotropia snoring drooling diurnal enuresi…	Full or partial overlap with indication for testing	SNV	ARID1A	1	27087899	27087899	c.2186C>T	Pro729Leu	Heterozygous	missense_variant	unknown	Coffin-Siris Syndrome	DOMINANT	Variant of Uncertain Significance
00522	HIC	Male	POSITIVE	a diagnosis of Becker muscular dystrophy with dependence on a wheelchair muscle weakness clumsiness fatigue elevated serum creatine kinase developmental delay with speech delay/minimal speech intellectual disability seizures/epilepsy with abnormal EEG ataxia decreased pain sensitivity hypothyroidism airway clearance impairment astigmatism hyperopia pseudoesotropia snoring drooling diurnal enuresi…	Full or partial overlap with indication for testing	copy_number_variation		X	31593373	31906309	0	Xp21.1	Hemizygous	313 kb	unknown	Dystrophinopathies	X_LINKED	Pathogenic
00452	HIC	Male	POSITIVE	includes global developmental delay craniosynostosis type I Chiari malformation with congenital hydrocephalus and autistic features. He presents with a moderate cognitive impairment and language delay and both cognitive ability and verbal skills have regressed over time. Other features include macrocephaly a broad prominent forehead and dysmorphic facial features lordosis mild scoliosis sialorrhe…	Full or partial overlap with indication for testing	deletion	ARID1B	6	157527397	157527398	c.5247delA	Ala1750HisfsTer56	Heterozygous	frameshift_variant	de novo	Coffin-Siris Syndrome	DOMINANT	Pathogenic
00454	HIC	Male	See Below (Inconclusive)	a history of autism spectrum disorder ADHD and intellectual disability with strength in verbal reasoning but reported impairments of visual perception/visual-spatial skills. Additional features include a wide mouth hypopigmentation from a shadow mole and multiple flat nevi on the back and a cafe au lait spot on the left abdomen.	Full or partial overlap with indication for testing	SNV	ATP1A1	1	116941270	116941270	c.2152G>A	Gly718Ser	Heterozygous	missense_variant	de novo	Disease Association NOS	DOMINANT	Variant of Uncertain Significance
00494	HIC	Male	See Below (Inconclusive)	The macrocephaly severe autism intellectual disability ADHD bilateral sensorineural hearing loss epilepsy degenerative motor skills chronic pain and muscle weakness feeding difficulties ectopic posterior pituitary gland periventricular leukomalacia chiari malformation syrinx of spinal cord hypogonadism growth hormone deficiency delayed puberty and severe planovalgus deformity.	Full or partial overlap with indication for testing	SNV	PTEN	10	89692938	89692938	c.422A>G	His141Arg	Heterozygous	missense_variant	maternal	PTEN Hamartoma Tumor Syndrome	DOMINANT	Variant of Uncertain Significance
00427	HIC	Male	NEGATIVE	intellectual disability global developmental delay dwarfism bone hypoplasia scoliosis kyphosis hand and foot anomalies thyroid hypoplasia and hypothyroidism eye concerns tympanosclerosis periodontal disease severe chronic kidney failure and renal tubular acidosis.
00479	HIC	Male	See Below (Inconclusive)	autism spina bifida occulta dysphagia eating disorder and depressive disorder.	Incidental Finding	SNV	HOXB13	17	46805705	46805705	c.251G>A	Gly84Glu	Heterozygous	missense_variant	paternal	HOXB13-Related Prostate Cancer Susceptibility	DOMINANT	Pathogenic
00456	HIC	Male	POSITIVE	poor dentition velopharyngeal insufficiency sensorineural hearing loss reactive airway disease environmental and multiple food allergies poorly controlled eczema with multiple hemorrhagic crusted lesions elevated serum IgE levels low CD4 T-cells and CD4/CD8 ratio frequent sinopulmonary infections and a history of sepsis.	Full or partial overlap with indication for testing	SNV	ACTB	7	5568167	5568167	c.547C>G	Arg183Gly	Heterozygous	missense_variant	de novo	ACTB-related disorders	DOMINANT	Likely Pathogenic
00456	HIC	Male	POSITIVE	poor dentition velopharyngeal insufficiency sensorineural hearing loss reactive airway disease environmental and multiple food allergies poorly controlled eczema with multiple hemorrhagic crusted lesions elevated serum IgE levels low CD4 T-cells and CD4/CD8 ratio frequent sinopulmonary infections and a history of sepsis.	Full or partial overlap with indication for testing	SNV	ACTB	7	5567912	5567912	c.802G>T	Gly268Cys	Heterozygous	missense_variant; splice_region_variant	de novo	ACTB-related disorders	DOMINANT	Likely Pathogenic
00439	HIC	Male	POSITIVE	focal segmental glomerulosclerosis interstitial fibrosis and tube atrophy on renal biopsy prominent and echogenic kidneys on ultrasound proteinuria hyponatremia hypoalbuminemia hyperlipidemia vitamin D deficiency and lack of response to treatment with steroids or immunosuppressive therapy.	Full or partial overlap with indication for testing	SNV	NPHS2	1	179526339	179526339	c.561G>A	Met187Ile	Heterozygous	missense_variant	maternal	Steroid-Resistant Nephrotic Syndrome	RECESSIVE	Likely Pathogenic
00439	HIC	Male	POSITIVE	focal segmental glomerulosclerosis interstitial fibrosis and tube atrophy on renal biopsy prominent and echogenic kidneys on ultrasound proteinuria hyponatremia hypoalbuminemia hyperlipidemia vitamin D deficiency and lack of response to treatment with steroids or immunosuppressive therapy.	Full or partial overlap with indication for testing	SNV	NPHS2	1	179523626	179523626	c.779T>A	Val260Glu	Heterozygous	missense_variant	paternal	Steroid-Resistant Nephrotic Syndrome	RECESSIVE	Pathogenic
00449	HIC	Female	NEGATIVE	includes a prenatal diagnosis of congenital skeletal dysplasia with features of bell-shaped chest short bowed extremities bilateral talipes equinovarus and metatarsus adductus cervical spine kyphosis and dysmorphic facial features.
00475	HIC	Male	POSITIVE	congenital bilateral club feet and arthrogryposis multiplex congenita rib and femur fractures osteopenia with low bone density Wormian bones delayed bone age curvature of the spine inability to walk plagiocephaly brachydactyly global developmental delay expressive language delay hypotonia feeding difficulties and a simple/cupped left ear.	Full or partial overlap with indication for testing	SNV	TRRAP	7	98567780	98567780	c.7537T>C	Cys2513Arg	Heterozygous	missense_variant	unknown	TRRAP-related neurodevelopmental disorder	DOMINANT	Variant of Uncertain Significance
00475	HIC	Male	POSITIVE	congenital bilateral club feet and arthrogryposis multiplex congenita rib and femur fractures osteopenia with low bone density Wormian bones delayed bone age curvature of the spine inability to walk plagiocephaly brachydactyly global developmental delay expressive language delay hypotonia feeding difficulties and a simple/cupped left ear.	Full or partial overlap with indication for testing	SNV	TRIO	5	14488332	14488332	c.7595C>T	Ala2532Val	Heterozygous	missense_variant	unknown	TRIO-Related Intellectual Disability	DOMINANT	Variant of Uncertain Significance
00475	HIC	Male	POSITIVE	congenital bilateral club feet and arthrogryposis multiplex congenita rib and femur fractures osteopenia with low bone density Wormian bones delayed bone age curvature of the spine inability to walk plagiocephaly brachydactyly global developmental delay expressive language delay hypotonia feeding difficulties and a simple/cupped left ear.	Full or partial overlap with indication for testing	SNV	FKBP10	17	39975776	39975776	c.918-6T>G		Heterozygous	splice_region_variant; intron_variant	unknown	Osteogenesis Imperfecta With or Without Joint Contractures	RECESSIVE	Likely Pathogenic
00475	HIC	Male	POSITIVE	congenital bilateral club feet and arthrogryposis multiplex congenita rib and femur fractures osteopenia with low bone density Wormian bones delayed bone age curvature of the spine inability to walk plagiocephaly brachydactyly global developmental delay expressive language delay hypotonia feeding difficulties and a simple/cupped left ear.	Full or partial overlap with indication for testing	deletion	FKBP10	17	39975558	39975559	c.831delC	Gly278AlafsTer20	Heterozygous	frameshift_variant	unknown	Osteogenesis Imperfecta With or Without Joint Contractures	RECESSIVE	Pathogenic
00423	HIC	Female	POSITIVE	global developmental delay intellectual disability and attention deficit hyperactivity disorder. She also presents with a flat face short nose with bifid tip and short columella and hypertelorism. Her hands and feet are noted to be short and brachydactyly with clinodactyly is apparent in both hands and both feet.	Full or partial overlap with indication for testing	SNV	PDE4D	5	58270870	58270870	c.2051A>G	Glu684Gly	Heterozygous	missense_variant	de novo	Acrodysostosis type 2	DOMINANT	Likely Pathogenic
00455	HIC	Male	NEGATIVE	eosinophilic esophagitis with Barretts esophagus and severe erosive esophagitis. A maternal and paternal family history of early-onset cancers of various types were also reported.
00429	HIC	Female	NEGATIVE	includes intellectual disability growth delay short stature motor delay and regression language impairment hyposthenia microcephaly thin corpus callosum diffuse cortical atrophy dysmorphic features including elongated face micrognathia strabismus with nystagmus hypermetropic astigmatism and kyphosis.
00493	HIC	Female	See Below (Inconclusive)	microcephaly; agenesis of the corpus callosum and other consistent brain anomalies; occipital encephalocele; ventricular septal defect patent ductus arteriosus patent foramen ovale and pulmonary hypertension; feeding difficulties history of vomiting GERD and impaired swallowing; vertebral anomaly accessory ribs on both sides and digital anomalies; global developmental delay and intellectual disab…	Full or partial overlap with indication for testing	SNV	PIGU	20	33169414	33169414	c.989C>G	Pro330Arg	Heterozygous	missense_variant	maternal	Disease Association NOS	RECESSIVE	Variant of Uncertain Significance
00493	HIC	Female	See Below (Inconclusive)	microcephaly; agenesis of the corpus callosum and other consistent brain anomalies; occipital encephalocele; ventricular septal defect patent ductus arteriosus patent foramen ovale and pulmonary hypertension; feeding difficulties history of vomiting GERD and impaired swallowing; vertebral anomaly accessory ribs on both sides and digital anomalies; global developmental delay and intellectual disab…	Full or partial overlap with indication for testing	SNV	PIGU	20	33150359	33150359	c.1205G>A	Cys402Tyr	Heterozygous	missense_variant	paternal	Disease Association NOS	RECESSIVE	Variant of Uncertain Significance
00466	HIC	Female	See Below (Inconclusive)	The proband has a history of intrauterine growth restriction oligohydramnios and presents with respiratory distress at birth developmental delay feeding difficulties dysphagia failure to thrive hydrocephalus hypoglycemia weak musculature relative microcephaly pulmonary hypertension long digits with extra horizontal creases abnormal position of toes small umbilical hernia Mongolian spot and dysmor…	Full or partial overlap with indication for testing	SNV	MAPK8IP3	16	1812379	1812379	c.1564C>T	Arg522Cys	Heterozygous	missense_variant	unknown (not detected in mother)	MAPK8IP3-related disorders	DOMINANT	Variant of Uncertain Significance
00470	HIC	Female	NEGATIVE	dysmorphic features including macrocephaly large tongue and lips face and body asymmetry low-set and posteriorly rotated ears downslanting palpebral fissures large nose depressed nasal bridge hemihyperplasia severe cognitive delay global developmental delay obesity autism with aggressive behavior bilateral areas of hyperpigmention on arms and legs large hands with broad fingers larger left thigh …
00469	HIC	Female	POSITIVE	The proband is a prenatal-onset proportionate small size microcephaly dysphagia failure to thrive recurrent ear infections eustachian tube dysfunction failed hearing screen accommodative esotropia hyperopia global developmental delays stereotypic behavior and facial features that include downslanting palpebral fissures high arched palate micrognathia and posteriorly rotated protruding ears.	Full or partial overlap with indication for testing	insertion	ATN1	12	7048302	7048302	c.3188_3193dupTGCACC	Leu1063_His1064dup	Heterozygous	inframe_insertion	de novo	Congenital Hypotonia Epilepsy Developmental Delay and Digit Abnormalities (CHEDDA)	DOMINANT	Pathogenic
00434	HIC	Male	NEGATIVE	severe intellectual disability autism development and language delay lymphedema cryptorchidism hyperlaxity and dysmorphic features including upturned earlobes hypotelorism synophrys dental crowding and bilateral club feet.
00445	HIC	Male	NEGATIVE	developmental delays failure to thrive dysphagia oral aversion gastroesophageal reflux high arched palate laryngeal cleft and a history of weak suck and poor weight gain in infancy. He also has two older brothers with some similar features.
00459	HIC	Female	See Below (Inconclusive)	a complex medical history involving prematurity global developmental delay and multiple congenital anomalies including small VSD with PFO diaphragmatic hernia left bronchomalacia pectus excavatum oral dysphagia short toes and fingers single palmar creases lateral neck folds and radioulnar synostosis. She also exhibits dysmorphic features including a high and arched palate flat philtrum thin upper…	Full or partial overlap with indication for testing	SNV	FBN1	15	48766811	48766811	c.4001G>A	Gly1334Asp	Heterozygous	missense_variant	maternal	FBN1-Related Disorders	DOMINANT	Variant of Uncertain Significance
00459	HIC	Female	See Below (Inconclusive)	a complex medical history involving prematurity global developmental delay and multiple congenital anomalies including small VSD with PFO diaphragmatic hernia left bronchomalacia pectus excavatum oral dysphagia short toes and fingers single palmar creases lateral neck folds and radioulnar synostosis. She also exhibits dysmorphic features including a high and arched palate flat philtrum thin upper…	Full or partial overlap with indication for testing	SNV	TRIO	5	14508071	14508071	c.8834C>T	Thr2945Met	Heterozygous	missense_variant	de novo	TRIO-Related Intellectual Disability	DOMINANT	Variant of Uncertain Significance
00421	LMIC	Female	POSITIVE	skeletal dysplasia and short stature with a decreased span-to-height ratio and an increased upper/lower segment ratio. Genu varum deformities were surgically corrected.	Full or partial overlap with indication for testing	copy_number_variation		X	534390	935361	1	Xp22.33	Heterozygous	401 kb	de novo	SHOX Deficiency Disorders	DOMINANT	Pathogenic
00430	HIC	Female	POSITIVE	includes severe global developmental delay including motor and speech delay hypotonia pectus excavatum joint hypermobility and hyperextensible skin. Post-natal growth delay benign chronic neutropenia chronic pain gastroesophageal reflux patent foramen ovale blue sclera plagiocephaly and frontal bossing are also noted.	Full or partial overlap with indication for testing	SNV	SETBP1	18	42531866	42531866	c.2561C>A	Ser854Tyr	Heterozygous	missense_variant	de novo	Schinzel-Giedion Midface Retraction Syndrome	DOMINANT	Likely Pathogenic
00426	HIC	Female	POSITIVE	myopathy motor delay absence of dystrophin fibers on muscle biopsy but normal merosine and caveolin reduced alpha-sarco-glycan elevated CPK levels motor delay axial hypotonia and normal cognitive development.	Full or partial overlap with indication for testing	SNV	LMNA	1	156104701	156104701	c.745C>T	Arg249Trp	Heterozygous	missense_variant	de novo	Congenital Muscular Dystrophy LMNA-related	DOMINANT	Pathogenic
00400	LMIC	Female	POSITIVE	severe developmental delay with possible regression language delay feeding difficulties underdeveloped creases delayed tooth eruption smooth round teeth metopic ridge hypoplastic nasal bridge and nasal tip absent reflexes hypertonia stiff ankles tapered digits strabismus nystagmus jerky eye movements and jerky purposeless movements of the extremities. Reduced fetal activity during the pregnancy w…	Full or partial overlap with indication for testing	SNV	MECP2	X	153296161	153296161	c.1154C>G	Ser385Ter	Heterozygous	stop_gained	de novo	Rett Syndrome	X_LINKED	Pathogenic
00581	LMIC	Male	POSITIVE	includes microcephaly intellectual disability speech delay and dysmorphic features including left occipital plagiocephaly brachycephaly low flared eyebrows short nose with midface flatness broad uvula short broad neck decreased elbow mobility mild 3-4 syndactyly 5th finger clinodactyly and hirsutism.	Full or partial overlap with indication for testing	SNV	SMC3	10	112349659	112349659	c.1419G>C	Trp473Cys	Heterozygous	missense_variant	de novo	Cornelia de Lange Syndrome	DOMINANT	Likely Pathogenic
00467	HIC	Female	See Below (Inconclusive)	The proband is a a history of intractable seizures global developmental delays downslanting palpebral fissures anteverted nares broad nasal bridge tented upper lip single cafe au lait macule and Chiari I malformation.	Full or partial overlap with indication for testing	SNV	CAD	2	27459616	27459616	c.4315-1G>A		Heterozygous	splice_acceptor_variant	maternal	CAD-Related Early Infantile Epileptic Encephalopathy	RECESSIVE	Variant of Uncertain Significance
00467	HIC	Female	See Below (Inconclusive)	The proband is a a history of intractable seizures global developmental delays downslanting palpebral fissures anteverted nares broad nasal bridge tented upper lip single cafe au lait macule and Chiari I malformation.	Full or partial overlap with indication for testing	SNV	CAD	2	27456988	27456988	c.3512C>A	Pro1171Gln	Heterozygous	missense_variant	paternal	CAD-Related Early Infantile Epileptic Encephalopathy	RECESSIVE	Variant of Uncertain Significance
00527	HIC	Female	NEGATIVE	includes major malformations diaphragmatic hernia intellectual disability and dysmorphic features including strabismus retrognathia and a peculiar nose and philtrum. Pertinent family history includes the probands mother with cleft palate and maternal uncle with only one kidney.
00399	LMIC	Male	NEGATIVE	mesomelia brachydactyly distal phalangeal and nail hypoplasia and bilateral absence of the second phalanx of his second fingers. His mother and several maternal relatives are also reported to have similar skeletal features.
00468	HIC	Male	POSITIVE	congenital C2-C3 fusion with severe atlantoaxial subluxation compromising the canal at foramen magnum. In addition a progressive dilatation of aortic root has been detected. The probands phenotype also includes a global developmental delay specifically a mild cognitive delay and receptive-expressive language delay as well as a reduced oral sensory awareness anxiety OCD staring spells tortuous ret…	Full or partial overlap with indication for testing	copy_number_variation		22	18889571	21464697	1	22q11.21	Heterozygous	2.5 Mb	de novo	22q11.2 Deletion Syndrome	DOMINANT	Pathogenic
00481	HIC	Male	See Below (Inconclusive)	autism spectrum disorder delayed speech and language development echolalia stims hand-flapping and sometimes inappropriate behavior. He is also reported to be a picky eater sensitive to loud noises and has a history of gaze aversion frequent falling and shaking episodes.	Full or partial overlap with indication for testing	SNV	TNFRSF1A	12	6443327	6443327	c.123T>G	Asp41Glu	Heterozygous	missense_variant	paternal	Familial Periodic Fever	DOMINANT	Likely Pathogenic
00566	HIC	Female	See Below (Inconclusive)	The proband is a young adult with recurrent pterygia with corneal neovascularization resulting in vision loss and several features suggestive of a connective tissue disorder including irregular palate vocal cord dysfunction Marfanoid habitus hypermobility mild scoliosis loss of normal lordosis thin translucent skin prone to bruising and scarring tissue pads on knuckles Chiari malformation neuropa…	Full or partial overlap with indication for testing	SNV	DDR2	1	162746096	162746096	c.2219A>G	Tyr740Cys	Heterozygous	missense_variant	maternal	Disease Association NOS	DOMINANT	Variant of Uncertain Significance
00476	HIC	Female	See Below (Inconclusive)	includes Ehlers-Danlos syndrome anxiety asthma and fatigue.	Incidental Finding	SNV	MITF	3	70014091	70014091	c.952G>A	Glu318Lys	Heterozygous	missense_variant	unknown (not detected in mother)	Melanoma (risk allele)	DOMINANT	Pathogenic
00568	HIC	Female	See Below (Inconclusive)	progressive loss of muscle control and ambulation resulting in wheelchair use loss of speech extreme limb and muscle stiffness particularly of the lower body transient urinary incontinence periods of intense pain and difficulty swallowing. Spinal tap evidence of nerve tissue damage and possible thyroid hormone level abnormalities were also noted.	Full or partial overlap with indication for testing	SNV	SOD1	21	33039662	33039662	c.331C>T	His111Tyr	Heterozygous	missense_variant	paternal	Amyotrophic Lateral Sclerosis Dominant	DOMINANT	Variant of Uncertain Significance
00460	HIC	Male	NEGATIVE	developmental delays autism spectrum disorder behavioral differences including tantrums and biting macrocephaly hearing loss persistent asthma factor VII deficiency. He is described to have dysmorphic features including high forehead high hair line frontal upsweep frontal bossing long triangular face malar hypoplasia thin upper vermillion border with high arched palate hypertelorism telecanthus d…
00420	LMIC	Female	NEGATIVE	includes small for gestational age postnatal growth restriction microcephaly mild intellectual disability conductive hearing loss myopia astigmatism and dysmorphic features including upslanting palpebral fissures narrow bifrontal diameter large nose and retrognathia. Tiny mouth and absent eyelashes and nails were also noted at birth.
00296	LMIC	Female	POSITIVE	progressive microcephaly seizures severe hypertonia developmental delay psychomotor delay growth deficiency spasticity a hoarse voice and growling cry which resolved speech delay prominent auricles very prominent eyebrows and eyelashes synophrys straight and prominent nasal bridge short philtrum thin upper lip flat broad thorax with separated inverted nipples cafe au lait spots some excess hair o…	Full or partial overlap with indication for testing	SNV	SMC1A	X	53409228	53409228	c.3362G>A	Arg1121His	Heterozygous	missense_variant	de novo	Cornelia de Lange Syndrome	X_LINKED	Pathogenic
00464	HIC	Male	NEGATIVE	hypotonia muscle weakness abnormal gait borderline elevated creatine kinase speech delay sensory processing issues shorter than expected stature and feeding difficulties. He also has a history of cleft lip and palate and a family history of oral clefts.
00416	LMIC	Male	POSITIVE	short stature intellectual disability problems with attention and dysmorphic features including downslanting palpebral fissures prominent ears flat philtrum thin upper lip short neck broad chest and widely spaced nipples. Additional features include heart murmur with no cyanosis or dyspnea cubitus valgus brachydactyly bilateral clinodactyly Tanner 1 genital development Madelung deformity delayed …	Full or partial overlap with indication for testing	SNV	HUWE1	X	53607845	53607845	c.5662G>A	Val1888Met	Hemizygous	missense_variant	unknown (not detected in father)	X-Linked Syndromic Intellectual Disability Turner Type	X_LINKED	Variant of Uncertain Significance
00416	LMIC	Male	POSITIVE	short stature intellectual disability problems with attention and dysmorphic features including downslanting palpebral fissures prominent ears flat philtrum thin upper lip short neck broad chest and widely spaced nipples. Additional features include heart murmur with no cyanosis or dyspnea cubitus valgus brachydactyly bilateral clinodactyly Tanner 1 genital development Madelung deformity delayed …	Full or partial overlap with indication for testing	insertion	EXT2	11	44146500	44146500	c.1005_1006dupGC	His336ArgfsTer30	Heterozygous	frameshift_variant	unknown (not detected in father)	Hereditary Multiple Osteochondromatosis	DOMINANT	Pathogenic
00416	LMIC	Male	POSITIVE	short stature intellectual disability problems with attention and dysmorphic features including downslanting palpebral fissures prominent ears flat philtrum thin upper lip short neck broad chest and widely spaced nipples. Additional features include heart murmur with no cyanosis or dyspnea cubitus valgus brachydactyly bilateral clinodactyly Tanner 1 genital development Madelung deformity delayed …	Full or partial overlap with indication for testing	copy_number_variation		17	722145	1875784	1	17p13.3	Heterozygous	1.1 Mb	unknown (not detected in father)	17p13.3 Microdeletion syndrome	DOMINANT	Uncertain Clinical Significance
00428	HIC	Male	NEGATIVE	includes prenatal onset growth deficiency congenital hip dysplasia severe congenital bilateral glaucoma delayed bone age small ears short stature and joint laxity.
00128	HIC	Male	NEGATIVE	progressive lower extremity weakness bilateral foot drop spasticity hyperreflexia gait disturbances MRI findings consistent with myositis with mild fatty atrophy in gastrocnemius and soleus muscles bilaterally EMG and muscle biopsy showing denervation pattern consistent with motor neuron disease. The proband also tested positive for ANA and Sjogrens antibodies has elevated plasma CK and numerous …
00514	LMIC	Female	POSITIVE	includes short stature congenital ichthyosis with skin lesions and dry skin coarse and sparse hair sparse eyebrows short nose mild leg pain calcifications in the spine and feet and failure to thrive.	Full or partial overlap with indication for testing	SNV	EBP	X	48382362	48382362	c.203G>A	Trp68Ter	Heterozygous	stop_gained	maternal	X-Linked Chondrodysplasia Punctata Type II	X_LINKED	Pathogenic
00293	LMIC	Male	POSITIVE	includes axial hypotonia microcephaly and delayed myelination identified via brain MRI developmental delay spasms with staring spells an abnormal EEG and tight clenched hands. Prenatal detection of ventriculomegaly and microcephaly was reported. Small or hypoplastic left olfactory bulb/tract esotropia microtia bilateral mastoid and middle ear effusions and a history of diarrhea are also noted.	Full or partial overlap with indication for testing	copy_number_variation		14	28836918	29955663	1	14q12	Heterozygous	1.1 Mb	de novo	FOXG1 Syndrome	DOMINANT	Pathogenic
00451	HIC	Female	POSITIVE	motor regression starting at around three years of age. She is noted to have a wide-based gait left foot inversion with toe-walking increased tone in the lower extremities and abnormal reflexes with clonus. Brain MRI showed diffuse white matter lesions and spine MRI showed cervical and thoracic syrinx.	Full or partial overlap with indication for testing	SNV	RNASEH2B	13	51519581	51519581	c.529G>A	Ala177Thr	Homozygous	missense_variant	maternal paternal	Aicardi-Goutieres Syndrome	RECESSIVE	Pathogenic
00415	LMIC	Female	NEGATIVE	This proband presents with short stature; hip dysplasia; unstable gait; body asymmetry; slow eruption of teeth; absent second premolars; slow abnormal patchy hair growth; abdominal bloating; feeling of always being cold; failure to thrive; and low body weight.
00398	LMIC	Female	POSITIVE	intellectual disability speech and developmental delays short stature severe myopia hyponasal speech vocal pitch ankle clonus brisk reflexes encopresis constipation and dysmorphic features including small nose small nasal tip tubular nose adynamic palate boxy forehead very short palpebral fissures long straight eyelashes mild maxillary hypoplasia smooth philtrum giant permanent teeth in a small m…	Full or partial overlap with indication for testing	insertion	EZH2	7	148506242	148506242	c.2111-3_2115dupCAGTTATG	Met706GlnfsTer3	Heterozygous	frameshift_variant	de novo	Weaver Syndrome	DOMINANT	Variant of Uncertain Significance
00398	LMIC	Female	POSITIVE	intellectual disability speech and developmental delays short stature severe myopia hyponasal speech vocal pitch ankle clonus brisk reflexes encopresis constipation and dysmorphic features including small nose small nasal tip tubular nose adynamic palate boxy forehead very short palpebral fissures long straight eyelashes mild maxillary hypoplasia smooth philtrum giant permanent teeth in a small m…	Full or partial overlap with indication for testing	copy_number_variation		20	51799647	62916626	3	20q13.2-q13.33	Heterozygous	11.1 Mb	de novo	20qter Duplication Syndrome	DOMINANT	Pathogenic
00418	LMIC	Female	See Below (Inconclusive)	hypertrichosis from birth excessive weight a large heart deeply creased hands and coarse facial features including a low nasal bridge epicanthal folds anteverted nares a pronounced cupids bow of upper the lip hypertelorism full periorbital tissues and puffy eyelids. Additional features in this proband include polyhydramnios at birth patent ductus arteriosus and behavioral problems.	Full or partial overlap with indication for testing	SNV	ABCC9	12	22063164	22063164	c.1247T>C	Leu416Ser	Heterozygous	missense_variant	unknown (not detected in mother)	Hypertrichotic Osteochondrodysplasia	DOMINANT	Variant of Uncertain Significance
00292	LMIC	Male	See Below (Inconclusive)	severe macrocephaly developmental delay and doughy muscles with no reflexes. Additional features include an open anterior fontanel posteriorly rotated ears prominent median bars on ears slight pectus excavatum deep crease hand folds and diastasis of the rectus muscle.	Full or partial overlap with indication for testing	SNV	PTEN	10	89692973	89692973	c.457G>C	Asp153His	Heterozygous	missense_variant	paternal	PTEN Hamartoma Tumor Syndrome	DOMINANT	Variant of Uncertain Significance
00529	HIC	Female	See Below (Inconclusive)	includes severe global developmental delay growth retardation chronic respiratory failure and suspected Marden Walker syndrome. She was noted to have bilateral talipes at birth scoliosis with fusion of the right peduncles of T7-T10 soft palate cleft patent ductus arteriosus Dandy Walker malformation and dysmorphic features including narrow forehead long philtrum thin lips sparse eyebrows long and…	Full or partial overlap with indication for testing	SNV	FLNA	X	153596034	153596034	c.695C>T	Ala232Val	Heterozygous	missense_variant	maternal	FLNA-Related Otopalatodigital Spectrum Disorders	X_LINKED	Variant of Uncertain Significance
00529	HIC	Female	See Below (Inconclusive)	includes severe global developmental delay growth retardation chronic respiratory failure and suspected Marden Walker syndrome. She was noted to have bilateral talipes at birth scoliosis with fusion of the right peduncles of T7-T10 soft palate cleft patent ductus arteriosus Dandy Walker malformation and dysmorphic features including narrow forehead long philtrum thin lips sparse eyebrows long and…	Full or partial overlap with indication for testing	SNV	PIEZO2	18	10671738	10671738	c.8045G>T	Gly2682Val	Heterozygous	missense_variant	de novo	Disease Association NOS	DOMINANT	Variant of Uncertain Significance
00294	LMIC	Female	POSITIVE	includes intellectual disability global developmental delay speech delay attention deficit epicanthal folds upslanting palpebral fissures smooth philtrum long slender fingers and borderline microcephaly.	Full or partial overlap with indication for testing	copy_number_variation		5	137754276	138994590	1	5q31.2	Heterozygous	1.2 Mb	unknown (not detected in mother)	Disease Association NOS	DOMINANT	Uncertain Clinical Significance
00414	LMIC	Male	See Below (Inconclusive)	includes intellectual disability dysmorphic features and a history of global developmental delays. He has a weak stance difficulty walking tremors short stature a facial grimace small feet and small hands with tapered hypermobile fingers. Family history is remarkable for a younger sister with intellectual disability similar facial grimace and behavioral abnormalities.	Incidental Finding	deletion	DICER1	14	95566191	95566192	c.4131delT	Val1378Ter	Heterozygous	frameshift_variant	de novo	DICER1-related tumor susceptibility syndrome	DOMINANT	Likely Pathogenic
00401	LMIC	Female	NEGATIVE	includes intellectual disability global developmental delays a history of one febrile seizure and a subsequent non-febrile seizure now treated with Trileptal. She displays inappropriate laughter and smiling and some aggressive behaviors. She has long slender tapered fingers with joint hypermobility and an unusual facial grimace. Family history is remarkable for a brother with intellectual disabil…
00417	LMIC	Male	See Below (Inconclusive)	The proband has a history of developmental delay and has a diagnosis of mental retardation. He also presents with cryptorchidism hernia frontal encephalocele and stiff gait. Dysmorphic features include metopic ridge with fleshy glabella two posterior hair whorls ptosis epicanthal folds intraorbital crease upslanting palpebral fissures protuberant ears unusual nose with hypoplastic alae and bulbou…	Full or partial overlap with indication for testing	SNV	ASH1L	1	155319242	155319242	c.7430A>G	Asp2477Gly	Heterozygous	missense_variant	unknown (not detected in mother)	ASH1L-related neurodevelopmental disorders	DOMINANT	Variant of Uncertain Significance
00587	LMIC	Male	POSITIVE	includes spasticity and flexion of the lower and upper limbs clubfeet severe hip dysplasia motor delay severe kyphosis short neck broad thorax and thick ribs.	Full or partial overlap with indication for testing	deletion	TOR1A	9	132576340	132576343	c.907_909delGAG	Glu303del	Homozygous	inframe_deletion	maternal paternal	Early-onset primary dystonia	DOMINANT	Pathogenic
00422	LMIC	Male	POSITIVE	includes muscle weakness motor delays underbite hypotonia decreased strength learning disability long face myopathic face open mouth forward tongue ptosis and long tapered creases on right hand.	Full or partial overlap with indication for testing	short_tandem_repeat_variation	DMPK	19	46273462	46273522	CTG		Heterozygous	short_tandem_repeat_expansion		Myotonic Dystrophy type 1	DOMINANT	Expanded
00295	LMIC	Male	POSITIVE	includes hypotonia at birth motor delay that resolved over time growth deficit associated with neuromuscular disorder EMG showing myopathic pattern and dysmorphic features including dolichocephaly prominent metopic suture straight eyebrows posteriorly rotated ears and camptodactyly of fingers 2 to 5.	Full or partial overlap with indication for testing	SNV	PREPL	2	44565489	44565489	c.1155+1G>A		Homozygous	splice_donor_variant	maternal paternal	PREPL deficiency	RECESSIVE	Likely Pathogenic
00559	HIC	Male	POSITIVE	agenesis of corpus callosum developmental delay dysmorphic features poor growth short stature inflammatory bowel disease fetal pads on fingers and toes cryptorchidism multiple melanocytic nevi psoriasiform dermatitis and right distal femur non-ossifying fibroma. Dysmorphic features include mild coarseness thick eyebrows short philtrum and broad nasal tip.	Full or partial overlap with indication for testing	SNV	ARID1B	6	157527541	157527541	c.5266G>T	Glu1756Ter	Heterozygous	stop_gained	de novo	Coffin-Siris Syndrome	DOMINANT	Pathogenic
00287	HIC	Male	See Below (Inconclusive)	a history of DOPA-responsive juvenile dystonia-parkinsonism motor delay and oculogyric crisis. He is also noted to have diurnal fluctuations hypotonia low weight reduced homovanillic acid levels a mildly low hanging columella and protruding ears.	Full or partial overlap with indication for testing	SNV	UNC80	2	210846963	210846963	c.8981T>C	Ile2994Thr	Heterozygous	missense_variant	paternal	UNC80 Deficiency	RECESSIVE	Variant of Uncertain Significance
00287	HIC	Male	See Below (Inconclusive)	a history of DOPA-responsive juvenile dystonia-parkinsonism motor delay and oculogyric crisis. He is also noted to have diurnal fluctuations hypotonia low weight reduced homovanillic acid levels a mildly low hanging columella and protruding ears.	Full or partial overlap with indication for testing	SNV	UNC80	2	210818931	210818931	c.7196C>T	Ala2399Val	Heterozygous	missense_variant	maternal	UNC80 Deficiency	RECESSIVE	Variant of Uncertain Significance
00589	HIC	Male	See Below (Inconclusive)	severe developmental delay autism absent speech hypothyroidism and feeding dysfunction. Reduced fetal movements were noted during pregnancy with rigidity at birth and failure to thrive in infancy. The proband has a history of severe constipation reflux vomiting and nausea. His phenotype also includes tall stature frontal bossing an underdeveloped nasal bridge clinodactyly of 5th fingers bilateral…	Full or partial overlap with indication for testing	SNV	PTCH1	9	98244262	98244262	c.715G>A	Ala239Thr	Heterozygous	missense_variant	paternal	Nevoid Basal Cell Carcinoma Syndrome	DOMINANT	Variant of Uncertain Significance
00555	HIC	Male	POSITIVE	global developmental delays significant tremor hypotonia generalized weakness areflexia gait abnormality bradykinesia persistent fat pads on feet some dysmorphic facial features relative macrocephaly and possible minor symmetric periventricular white matter changes.	Full or partial overlap with indication for testing	SNV	SMN1	5	70247773	70247773	c.840C>T	Phe280	Homozygous	synonymous_variant	unknown	Spinal Muscular Atrophy	RECESSIVE	Pathogenic
00317	LMIC	Female	POSITIVE	developmental delay motor skill regression severe hypotonia poor muscle mass and muscle wasting oromotor weakness and feeding difficulties respiratory difficulties requiring assisted ventilation recurrent pneumonia microcephaly hypotonic facies and hypomimia and bilateral spastic dorsiflexion.	Full or partial overlap with indication for testing	SNV	TK2	16	66575822	66575822	c.191C>T	Thr64Met	Heterozygous	missense_variant	unknown (not detected in mother)	TK2-Related Mitochondrial DNA Depletion Myopathy	RECESSIVE	Likely Pathogenic
00317	LMIC	Female	POSITIVE	developmental delay motor skill regression severe hypotonia poor muscle mass and muscle wasting oromotor weakness and feeding difficulties respiratory difficulties requiring assisted ventilation recurrent pneumonia microcephaly hypotonic facies and hypomimia and bilateral spastic dorsiflexion.	Full or partial overlap with indication for testing	SNV	TK2	16	66565335	66565335	c.323C>T	Thr108Met	Heterozygous	missense_variant	maternal	TK2-Related Mitochondrial DNA Depletion Myopathy	RECESSIVE	Pathogenic
00539	HIC	Male	See Below (Inconclusive)	includes epicanthus; micrognathia; high arched palate; low-set posteriorly rotated ears; limited opening of the mouth poor sucking and poor swallowing; bilateral club foot; cervical syringomyelia; transient apneas; and transient hypotonia/hypertonia.	Full or partial overlap with indication for testing	SNV	PIGA	X	15339665	15339665	c.1418G>C	Arg473Thr	Hemizygous	missense_variant	maternal	Multiple congenital anomalies-hypotonia-seizures syndrome 2	X_LINKED	Variant of Uncertain Significance
00433	HIC	Female	NEGATIVE	The probands phenotype is described as syndromic including mild intellectual disability microcephaly deafness conductive hearing loss high-pitched voice distal renal tubular acidosis esophageal reflux ocular depression severe astigmatism growth delay bone age delay brachysyndactyly of the toes tooth eruption delay hypopigmented macules telangiectasia and alopecia. Interatrial aneurysm hypokinesia…
00573	HIC	Female	NEGATIVE	mildly dilated ascending aorta dilated aortic root left ventricular hypertrophy trivial tricuspid valve insufficiency hypertension left pelvic kidney renal asymmetry moderately distended urinary bladder and somnolence.
00499	HIC	Female	See Below (Inconclusive)	fatigue headaches joint pain abdominal pain with constipation urinary frequency incontinence and diffuse white matter hyperintensities.	Full or partial overlap with indication for testing	SNV	MEFV	16	3304158	3304158	c.910G>A	Gly304Arg	Heterozygous	missense_variant;splice_region_variant	maternal	Familial Mediterranean Fever	RECESSIVE	Variant of Uncertain Significance
00499	HIC	Female	See Below (Inconclusive)	fatigue headaches joint pain abdominal pain with constipation urinary frequency incontinence and diffuse white matter hyperintensities.	Full or partial overlap with indication for testing	SNV	MEFV	16	3293880	3293880	c.1772T>C	Ile591Thr	Heterozygous	missense_variant	paternal	Familial Mediterranean Fever	RECESSIVE	Variant of Uncertain Significance
00538	HIC	Male	See Below (Inconclusive)	epilepsy with localized onset seizures with status epilepticus moderate diffuse encephalopathy headaches altered consciousness visual disturbances and auditory hallucinations.	Full or partial overlap with indication for testing	SNV	POLG	15	89868870	89868870	c.1760C>T	Pro587Leu	Heterozygous	missense_variant	maternal	POLG-Related Spectrum Disorders	RECESSIVE	Pathogenic
00538	HIC	Male	See Below (Inconclusive)	epilepsy with localized onset seizures with status epilepticus moderate diffuse encephalopathy headaches altered consciousness visual disturbances and auditory hallucinations.	Full or partial overlap with indication for testing	SNV	POLG	15	89873415	89873415	c.752C>T	Thr251Ile	Heterozygous	missense_variant	maternal	POLG-Related Spectrum Disorders	RECESSIVE	Pathogenic
00513	LMIC	Male	POSITIVE	includes a diagnosis of autism spectrum disorder intellectual disability language deficit epilepsy with myoclonic and atonic seizures recurrent otitis media muscular hypotonia and hypotrophy and articular hypermobility. He is also noted to have testicular torsion and an inguinal hernia.	Full or partial overlap with indication for testing	insertion	SHANK3	22	51159932	51159932	c.3642dupG	Pro1215AlafsTer?	Heterozygous	frameshift_variant	de novo	Phelan-McDermid Syndrome	DOMINANT	Pathogenic
00540	HIC	Female	See Below (Inconclusive)	includes global developmental delay failure to thrive Wilms tumor and right nephrectomy and dysmorphic features including broad nasal tip smooth philtrum thin upper vermillion poor dentition posteriorly-rotated large simple ears with prominent antihelix and thin helix and bilateral fifth finger clinodactyly.	Full or partial overlap with indication for testing	SNV	TFAP2A	6	10402794	10402794	c.814A>G	Ile272Val	Heterozygous	missense_variant	unknown (not detected in father)	Branchiooculofacial Syndrome	DOMINANT	Variant of Uncertain Significance
00540	HIC	Female	See Below (Inconclusive)	includes global developmental delay failure to thrive Wilms tumor and right nephrectomy and dysmorphic features including broad nasal tip smooth philtrum thin upper vermillion poor dentition posteriorly-rotated large simple ears with prominent antihelix and thin helix and bilateral fifth finger clinodactyly.	Full or partial overlap with indication for testing	SNV	MAGEL2	15	23891422	23891422	c.1468C>G	Pro490Ala	Heterozygous	missense_variant	unknown (not detected in father)	Schaaf-Yang syndrome	DOMINANT	Variant of Uncertain Significance
00579	HIC	Female	NEGATIVE	The proband has a history of progressive bilateral hand and arm weakness. She presents with bilateral wrist ankylosis arthralgia of the hand bilateral arm contractures camptodactyly the appearance of muscle wasting on the posterior and anterior hand daily chronic joint pain and idiopathic scoliosis. Other phenotypic features include migraine dizziness anxiety with traits of OCD a history of anore…
00523	HIC	Female	NEGATIVE	includes a history of chronic sinusitis with nasal polyps associated with nasal congestion obstructed nasal airflow hyposmia foul taste green nasal drainage and headaches. She has had positive allergy tests for dogs cats grass dairy and sulfas and has had positive cultures for staph pseudomonas Aspergillus and Bipolaris consistent with a diagnosis of allergic fungal sinusitis.
00536	HIC	Female	NEGATIVE	A 2-month-old female who was small for gestational age at birth. She had a confirmation of bilateral congenital cataracts seen on an ultrasound at 21 4wks. An echocardiogram at birth found patent foramen ovale and ductus arteriosis. She has a decreased size of both the nasal bone and mandibular bones increased orbital cavities and enlarged sella turcica seen on whole body radiography. She had mil…
00576	HIC	Male	NEGATIVE	abnormally dilated coronary arteries with aneurysms patent foramen ovale right femoral artery spasm history of iliac vein thrombosis Kawasaki shock syndrome fever conjunctivitis blepharitis hyponatremia hyperkalemia and vomiting. Neutrophilia thrombocytosis and elevated CRP were also noted.
00478	HIC	Male	NEGATIVE	Proband presents with stroke myocardial infarction prostate cancer slurred speech peripheral weakness hypothyroidism and being tired.
00564	HIC	Male	POSITIVE	skin findings consistent with tuberous sclerosis complex seizures migraines poor short-term memory poor sleep and sleep apnea keratoconus and chronic knee pain.	Full or partial overlap with indication for testing	deletion	TSC1	9	135802615	135802616	c.182delT	Leu61ArgfsTer37	Heterozygous	frameshift_variant	unknown	Tuberous Sclerosis Complex	DOMINANT	Pathogenic
00487	HIC	Female	NEGATIVE	includes fetal alcohol syndrome microcephaly global developmental delay intellectual disability language regression and speech delay and fine motor delay. Dysmorphic features include ptosis bitemporal narrowing downslanted palpebral fissures bulbous nose flattened groove of the philtrum flattened peaks of the lip and crowding of teeth and congenital preauricular pit. Skeletal deformities include …
00546	HIC	Male	NEGATIVE	consists of sympathetic hyperactivity systemic inflammatory response and mood/affective disorder including anxiety mood swings depression attention deficit-hyperactivity disorder panic attacks and PTSD. Persistent musculoskeletal and abdominal pain generalized weakness muscle spasms poor balance and low energy are also noted.
00546	HIC	Male	NEGATIVE	consists of sympathetic hyperactivity systemic inflammatory response and mood/affective disorder including anxiety mood swings depression attention deficit-hyperactivity disorder panic attacks and PTSD. Persistent musculoskeletal and abdominal pain generalized weakness muscle spasms poor balance and low energy are also noted.	Secondary Finding	SNV	DSP	6	7582926	7582926	c.5431G>T	Glu1811Ter	Heterozygous	stop_gained				Likely Pathogenic
00542	HIC	Female	See Below (Inconclusive)	includes mid-borderline intellectual disability global developmental delay receptive language delay and craniofacial dysmorphic features which include bitemporal narrowing malar hypoplasia depressed nasal bridge hypertelorism and small palpebral fissures. Other phenotypic features noted include possible absent seizures dyspraxia history of conductive hearing loss eustachian tube dysfunction poor …	Full or partial overlap with indication for testing	SNV	CSNK2B	6	31635666	31635666	c.94G>A	Asp32Asn	Heterozygous	missense_variant	unknown (not detected in mother)	CSNK2B-related intellectual disability with or without epilepsy	DOMINANT	Variant of Uncertain Significance
00289	HIC	Male	NEGATIVE	unexplained weight loss and fatigue. He also presents with abdominal pain or cramping blood in stools alternate symptoms of constipation and diarrhea rectal prolapse incontinence frequent urination abnormal lumps or bumps abnormal kappa and lambda free light chains with normal ratio skin rash back pain and pain or stiffness in the joints light-headedness numbness or shooting pain in hands arms le…
00288	HIC	Female	NEGATIVE	includes segmental hyperpigmentation with regions of hyperkeratosis lichenoid and verruca-like plaques and epidermal nevi. These features are described as being restricted to her left extremities and torso and follow Blaschkos lines.
00486	HIC	Female	NEGATIVE	developmental delay febrile seizure a high arched palate epicanthal folds bilateral congenital ptosis bilateral myopia congenital bilateral heterochromia of iris and behavorial issues including tantrums and sensory processing difficulty.
00577	HIC	Male	NEGATIVE	multiple musculoskeletal anomalies including syndactyly clinodactyly cystic bone abnormalities in upper limbs suggestive of multiple endochondroma right shortened ulna bilateral elbow and knee contractures and diffuse demineralization of osseous elements of the knee bilaterally. Hypotonia and gross motor delay are also reported along with a rapidly progressive loss of range of motion and sharp de…
00489	HIC	Male	See Below (Inconclusive)	developmental delay motor delay failure to thrive feeding difficulties reflux and hypotonia. He is also noted to have bilateral ptosis a mildly arched palate high arched prominent eyebrows and a sacral dimple.	Full or partial overlap with indication for testing	deletion	KMT2A	11	118392836	118392837	c.11870delA	Lys3957SerfsTer15	Heterozygous	frameshift_variant	maternal	Wiedemann-Steiner Syndrome	DOMINANT	Variant of Uncertain Significance
00535	HIC	Male	POSITIVE	congenital microcephaly seizure disorder significant cognitive impairment global developmental delay regression lack of speech (nonverbal) high pain tolerance history of gastroparesis feeding difficulties encephalopathy cerebellar hypoplasia thin corpus callosum spastic quadriparesis spastic quadraplegia scoliosis exotropia mild myopia optic nerve hypoplasia increased tone right hip subluxation h…	Full or partial overlap with indication for testing	SNV	F8	X	154182266	154182266	c.1804C>G	Arg602Gly	Hemizygous	missense_variant	maternal	Factor VIII Deficiency (Hemophilia A)	X_LINKED	Likely Pathogenic
00592	HIC	Male	NEGATIVE	congenital adrenal hyperplasia bilateral polydactyly of the first to fourth toes webbed fingers bilateral syndactyly of third and fourth finger ulnar polydactyly of the left hand moderate white matter volume loss with ventriculomegaly macrocephaly hydrocephalus dolichocephaly plagiocephaly and dysmorphic features including hypertelorism horizontal palpebral fissures depressed nasal bridge with sh…
00652	LMIC	Female	NEGATIVE	tall stature dolichostenomelia joint hypermobility pulmonary valve insufficiency shortening of the Achilles tendon myopia scoliosis and dental crowding.
00625	LMIC	Female	POSITIVE	tall stature dolichostenomelia arachnodactyly joint hyperlaxity and congenital scoliosis with short thoracic cavity. Congenital cardiac disease is also noted including mitral valve prolapse dilation of the left heart chambers heart murmur and interauricular communication which has been corrected.	Full or partial overlap with indication for testing	SNV	FBN1	15	48764867	48764867	c.4217A>G	Asp1406Gly	Heterozygous	missense_variant	paternal	Marfan Syndrome	DOMINANT	Likely Pathogenic
00625	LMIC	Female	POSITIVE	tall stature dolichostenomelia arachnodactyly joint hyperlaxity and congenital scoliosis with short thoracic cavity. Congenital cardiac disease is also noted including mitral valve prolapse dilation of the left heart chambers heart murmur and interauricular communication which has been corrected.	Full or partial overlap with indication for testing	copy_number_variation		22	20730996	21465342	1	22q11.21	Heterozygous	734 kb	de novo	22q11.2 Deletion Syndrome	DOMINANT	Pathogenic
00621	LMIC	Female	NEGATIVE	growth delay and multiple malformations including ventricular septal defect caudal regression syndrome lumbar dysraphism lower-limb valgus and hypotonia microtia atresia hearing loss hippocampus bilateral atrophy and hypoplastic genitalia.
00621	LMIC	Female	NEGATIVE	growth delay and multiple malformations including ventricular septal defect caudal regression syndrome lumbar dysraphism lower-limb valgus and hypotonia microtia atresia hearing loss hippocampus bilateral atrophy and hypoplastic genitalia.	Secondary Finding	deletion	BRCA2	13	32907408	32907413	c.1796_1800delCTTAT	Ser599Ter	Heterozygous	frameshift_variant				Pathogenic
00621	LMIC	Female	NEGATIVE	growth delay and multiple malformations including ventricular septal defect caudal regression syndrome lumbar dysraphism lower-limb valgus and hypotonia microtia atresia hearing loss hippocampus bilateral atrophy and hypoplastic genitalia.	Secondary Finding	SNV	BRCA2	13	32906433	32906433	c.818C>A	Ser273Ter	Heterozygous	stop_gained				Pathogenic
00623	LMIC	Female	POSITIVE	epilepsy microcephaly communication disorders learning difficulties cerebral palsy spasticity visual disability ametropy strabismus pigmentation anomalies enlarged cerebral vetricles cystic brain malformations and suspected incontinentia pigmenti.	Full or partial overlap with indication for testing	SNV	CYFIP2	5	156750941	156750941	c.1759C>T	Arg587Trp	Heterozygous	missense_variant	de novo	CYFIP2-related neurodevelopmental disorders	DOMINANT	Likely Pathogenic
00565	HIC	Female	POSITIVE	uveitis inflammatory arthritis abdominal bloating and pain rash in the groin elbows and ankles short stature and granuloma.	Full or partial overlap with indication for testing	SNV	NOD2	16	50745306	50745306	c.1484G>A	Cys495Tyr	Heterozygous	missense_variant	de novo	Blau Syndrome	DOMINANT	Pathogenic
00575	HIC	Female	POSITIVE	sudden onset of multiple afebrile generalized tonic-clonic seizures with impaired consciousness ataxic gait and white matter abnormalities in the brain seen on MRI.	Full or partial overlap with indication for testing	SNV	SCN8A	12	52200603	52200603	c.5333A>G	Asp1778Gly	Heterozygous	missense_variant	de novo	SCN8A-related epilepsy with encephalopathy	DOMINANT	Likely Pathogenic
00619	LMIC	Female	POSITIVE	communication disorder conduct disorder echolalia stereotypical movements recurrent respiratory infections high pain threshold macrocephaly global developmental delay failure to thrive brain atrophy dysmorphic features abnormal folds on palms and soles and oligohydramnios.	Full or partial overlap with indication for testing	SNV	CHD8	14	21867811	21867811	c.4871G>A	Trp1624Ter	Heterozygous	stop_gained	de novo	Autism Spectrum Disorder	DOMINANT	Pathogenic
00635	LMIC	Male	POSITIVE	includes macrocephaly tall stature developmental delays hypotonia ligamentous laxity abdominal wall weakness hip dysplasia hyperpigmented spots metaphyseal abnormalities on imaging and possible macroorchidism.	Full or partial overlap with indication for testing	deletion	KMT2E	7	104746405	104746406	c.2555delA	Asn852IlefsTer7	Heterozygous	frameshift_variant	de novo	KMT2E-related neurodevelopmental disorders with or without epilepsy	DOMINANT	Pathogenic
00662	HIC	Female	See Below (Inconclusive)	hammertoes double-jointed fingers hyperextensible knees along with stretchy skin decreased muscle strength numbness and burning of the limbs with a loss of proprioception recurrent acute pancreatitis peptic ulcers kidney and adrenal gland cysts altered temperature perception migraines recurrent oral ulcers burning mouth syndrome lesion rings in the eyes ringing and numbness of the ears orthostati…	Full or partial overlap with indication for testing	SNV	GARS1	7	30643121	30643121	c.668A>G	Gln223Arg	Heterozygous	missense_variant	unknown	GARS1-Associated Axonal Neuropathy	DOMINANT	Variant of Uncertain Significance
00662	HIC	Female	See Below (Inconclusive)	hammertoes double-jointed fingers hyperextensible knees along with stretchy skin decreased muscle strength numbness and burning of the limbs with a loss of proprioception recurrent acute pancreatitis peptic ulcers kidney and adrenal gland cysts altered temperature perception migraines recurrent oral ulcers burning mouth syndrome lesion rings in the eyes ringing and numbness of the ears orthostati…	Full or partial overlap with indication for testing	SNV	CFTR	7	117182128	117182128	c.1175T>C	Val392Ala	Heterozygous	missense_variant	unknown	CFTR-Related Disorders	RECESSIVE	Variant of Uncertain Significance
00580	HIC	Male	See Below (Inconclusive)	includes common variable immunodeficiency; recurrent infections including pneumonia; diabetes insipidus with chronic hypernatremia; nephrocalcinosis bilateral renal punctate calcifications and left mild pelvic and calyceal dilation; developmental delay; gait abnormality; speech abnormality; failure to thrive; prematurity; small patent foramen ovale; microcephaly; craniosynostosis; dysmorphic feat…	Full or partial overlap with indication for testing	SNV	BCL11A	2	60773174	60773174	c.317C>T	Thr106Met	Heterozygous	missense_variant	de novo	BCL11A-related intellectual disability	DOMINANT	Variant of Uncertain Significance
00580	HIC	Male	See Below (Inconclusive)	includes common variable immunodeficiency; recurrent infections including pneumonia; diabetes insipidus with chronic hypernatremia; nephrocalcinosis bilateral renal punctate calcifications and left mild pelvic and calyceal dilation; developmental delay; gait abnormality; speech abnormality; failure to thrive; prematurity; small patent foramen ovale; microcephaly; craniosynostosis; dysmorphic feat…	Full or partial overlap with indication for testing	SNV	PKHD1	6	51889474	51889474	c.5134G>A	Gly1712Arg	Homozygous	missense_variant	maternal paternal	Polycystic Kidney Disease Autosomal Recessive	RECESSIVE	Likely Pathogenic
00580	HIC	Male	See Below (Inconclusive)	includes common variable immunodeficiency; recurrent infections including pneumonia; diabetes insipidus with chronic hypernatremia; nephrocalcinosis bilateral renal punctate calcifications and left mild pelvic and calyceal dilation; developmental delay; gait abnormality; speech abnormality; failure to thrive; prematurity; small patent foramen ovale; microcephaly; craniosynostosis; dysmorphic feat…	Full or partial overlap with indication for testing	SNV	TAF1	X	70595023	70595023	c.419A>T	Asp140Val	Hemizygous	missense_variant	maternal	TAF1-Related Syndromic Intellectual Disability	X_LINKED	Variant of Uncertain Significance
00624	LMIC	Male	POSITIVE	includes intellectual disability; global development delay; psychomotor disability; dysmorphic features including fusiform fingers brachydactyly in toes large ears and broad thorax; hypogonadism and obesity. The proband also presents with epilepsy high blood pressure resistance to insulin polyphagia and behavioral problems.	Incidental Finding	SNV	TTR	18	29172937	29172937	c.148G>A	Val50Met	Heterozygous	missense_variant	paternal	Familial Transthyretin Amyloidosis	DOMINANT	Pathogenic
00624	LMIC	Male	POSITIVE	includes intellectual disability; global development delay; psychomotor disability; dysmorphic features including fusiform fingers brachydactyly in toes large ears and broad thorax; hypogonadism and obesity. The proband also presents with epilepsy high blood pressure resistance to insulin polyphagia and behavioral problems.	Full or partial overlap with indication for testing	copy_number_variation		16	29615859	30199454	1	16p11.2	Heterozygous	583 kb	unknown (not detected in father)	16p11.2 Microdeletion Syndrome	DOMINANT	Pathogenic
00620	LMIC	Male	NEGATIVE	developmental delay hip dysplasia left femoral hypoplasia hemivertebrae T8-T10 scoliosis hypothyroidism and failure to thrive with low weight and height. His clinical presentation is described as incomplete VACTERL. Allergic rhinitis and bronchial spasm are also noted.
00628	LMIC	Female	NEGATIVE	dysmorphic features midface hypoplasia nystagmus gynecomastia global developmental delay retinitis pigmentosa bilateral hearing loss hypotonia and hyperkeratosis of the thoracic and abdominal skin.
00541	HIC	Male	NEGATIVE	autism and epilepsy.
00291	HIC	Male	POSITIVE	poor weight gain Laing distal myopathy restrictive lung disease mild persistent asthma without complication and brain tumor.	Full or partial overlap with indication for testing	deletion	MYH7	14	23886196	23886199	c.4522_4524delGAG	Glu1508del	Heterozygous	inframe_deletion; splice_region_variant	paternal	Laing Distal Myopathy	DOMINANT	Pathogenic
00618	LMIC	Male	See Below (Inconclusive)	The proband's reported phenotype consists primarily of abnormalities of the brain and visual system including bilateral optic nerve hypoplasia septum pellucidum agenesis abnormal optic chiasm nystagmus converging strabismus and visual disability. Global developmental delay intellectual disability behavioral abnormalities hypotonia short stature low weight sleep disorder relative macrocephaly emes…	Full or partial overlap with indication for testing	SNV	KIF7	15	90196038	90196038	c.124C>G	Pro42Ala	Heterozygous	missense_variant	unknown	KIF7-related ciliopathy spectrum disorder	RECESSIVE	Variant of Uncertain Significance
00618	LMIC	Male	See Below (Inconclusive)	The proband's reported phenotype consists primarily of abnormalities of the brain and visual system including bilateral optic nerve hypoplasia septum pellucidum agenesis abnormal optic chiasm nystagmus converging strabismus and visual disability. Global developmental delay intellectual disability behavioral abnormalities hypotonia short stature low weight sleep disorder relative macrocephaly emes…	Full or partial overlap with indication for testing	SNV	KIF7	15	90193040	90193040	c.461G>A	Arg154Gln	Heterozygous	missense_variant	unknown	KIF7-related ciliopathy spectrum disorder	RECESSIVE	Variant of Uncertain Significance
00588	HIC	Female	POSITIVE	includes prenatal onset growth retardation macrocephaly coarse facial features low set ears short neck musculoskeletal anomalies including bell shaped chest short limbs bilateral club feet hand and foot anomalies gracile ribs and clavicles osteopenia and a neonatal fracture pulmonary hypoplasia respiratory difficulties reduced spontaneous movement feeding difficulties and a hemangioma. She was bo…	Full or partial overlap with indication for testing	MNV	HRAS	11	534287	534288	c.35_36delGCinsTT	Gly12Val	Heterozygous	missense_variant	de novo	Costello syndrome	DOMINANT	Pathogenic
00472	HIC	Male	POSITIVE	includes Ehlers Danlos syndrome hypotonia left ventricular non-compaction cardiomyopathy migraines staring episodes speech impairment sensory processing deficit and periodic illnesses that include fevers elevated liver enzymes abdominal pain constipation abnormal stool and variable rashes.	Full or partial overlap with indication for testing	SNV	MYH7	14	23897728	23897728	c.1559G>T	Cys520Phe	Heterozygous	missense_variant	maternal	Hypertrophic Cardiomyopathy	DOMINANT	Likely Pathogenic
00472	HIC	Male	POSITIVE	includes Ehlers Danlos syndrome hypotonia left ventricular non-compaction cardiomyopathy migraines staring episodes speech impairment sensory processing deficit and periodic illnesses that include fevers elevated liver enzymes abdominal pain constipation abnormal stool and variable rashes.	Full or partial overlap with indication for testing	SNV	MEFV	16	3293880	3293880	c.1772T>C	Ile591Thr	Heterozygous	missense_variant	paternal	Familial Mediterranean Fever	RECESSIVE	Variant of Uncertain Significance
00471	HIC	Female	See Below (Inconclusive)	includes periodic severe gastrointestinal issues including reflux gastroparesis diarrhea and/or constipation which are provoked by emotional exhaustion or intercurrent disease. She is also noted to have headaches migraine-like episodes farsightedness mild dyslexia mild hypertelorism upturned nose mild scoliosis mild sternal excavatum intermittent rash fleshy-colored moles and short-term memory is…	Full or partial overlap with indication for testing	SNV	TNFRSF1A	12	6442643	6442643	c.362G>A	Arg121Gln	Heterozygous	missense_variant	maternal	Familial Periodic Fever	DOMINANT	Variant of Uncertain Significance
00471	HIC	Female	See Below (Inconclusive)	includes periodic severe gastrointestinal issues including reflux gastroparesis diarrhea and/or constipation which are provoked by emotional exhaustion or intercurrent disease. She is also noted to have headaches migraine-like episodes farsightedness mild dyslexia mild hypertelorism upturned nose mild scoliosis mild sternal excavatum intermittent rash fleshy-colored moles and short-term memory is…	Full or partial overlap with indication for testing	SNV	MEFV	16	3293880	3293880	c.1772T>C	Ile591Thr	Heterozygous	missense_variant	paternal	Familial Mediterranean Fever	RECESSIVE	Variant of Uncertain Significance
00447	HIC	Male	See Below (Inconclusive)	developmental delay with regression epileptic encephalopathy severe hypotonia oropharyngeal dysphagia and failure to thrive. Dysmorphic features include congenital brachycephaly and abnormality of the shape of the left external ear. Brain MRIs show abnormal myelination thinning of the corpus callosum and decreased white matter volume.	Full or partial overlap with indication for testing	SNV	CACNA1A	19	13409523	13409523	c.2927G>A	Arg976Gln	Heterozygous	missense_variant	maternal	Early Infantile Epileptic Encephalopathy Autosomal Dominant	DOMINANT	Variant of Uncertain Significance
00526	HIC	Female	NEGATIVE	Ehler's Danlos syndrome and cardiomyopathy.
00485	HIC	Male	POSITIVE	widespread lower motor neuron disease dysarthria dysphagia dyspnea muscle weakness and tremors. A mildly low testosterone level was also noted.	Full or partial overlap with indication for testing	SNV	FUS	16	31202373	31202373	c.1483C>T	Arg495Ter	Heterozygous	stop_gained	unknown (not detected in father)	Amyotrophic Lateral Sclerosis Dominant	DOMINANT	Pathogenic
00453	HIC	Male	NEGATIVE	congenital heart defect infantile idiopathic thoracic scoliosis global developmental delay feeding disorder congenital lobar emphysema asthma esotropia ADHD and sleep disorder.
00508	HIC	Male	See Below (Inconclusive)	tyrosinase-positive oculocutaneous albinism and bilateral nystagmus. He also has macules of varying size and pigment.	Full or partial overlap with indication for testing	SNV	TYR	11	88911363	88911363	c.242C>T	Pro81Leu	Heterozygous	missense_variant	paternal	Oculocutaneous Albinism Type 1	RECESSIVE	Pathogenic
00508	HIC	Male	See Below (Inconclusive)	tyrosinase-positive oculocutaneous albinism and bilateral nystagmus. He also has macules of varying size and pigment.	Full or partial overlap with indication for testing	SNV	TYR	11	89017961	89017961	c.1205G>A	Arg402Gln	Heterozygous	missense_variant	unknown	Oculocutaneous Albinism Type 1	RECESSIVE	Variant of Uncertain Significance
00572	HIC	Male	NEGATIVE	global developmental delay delay of fine and gross motor skills language delay (the proband is non-verbal) regression of motor skills brain abnormalities on MRI lactic acidosis myopathic facies micrognathia prominent nasolabial folds squared nasal tip deeply set eyes bilateral hypermetropia plagiocephaly hypotonia oropharygeal dysphasia reduced strength reduced core and peripheral tone heavy swea…
00570	HIC	Female	See Below (Inconclusive)	developmental delay hypotonia hearing loss with congenital anomaly of right ear symmetric and myopathic facies hypertelorism broad nasal bridge and history of gastroesophageal reflux.	Full or partial overlap with indication for testing	copy_number_variation		3	857895	1428365	3	3p26.3	Heterozygous	570 kb	maternal	Disease Association NOS	DOMINANT	Uncertain Clinical Significance
00622	LMIC	Female	NEGATIVE	includes epilepsy that is resistant to treatment global developmental delay aphasia autism spectrum disorder attention deficit disorder and stereotypical behaviors. She is reported to have no dysmorphic features and is noted to have a lighter complexion that other family members.
00498	HIC	Female	POSITIVE	microcephaly truncal hypotonia syndactyly of the hands and right foot dysgenesis of the corpus callosum feeding difficulties failure to thrive patent ductus arteriosus and developmental delay. She has low anterior and posterior hair lines long eyelashes and bushy arched eyebrows. There are dysmorphic facial features including a depressed and broad nasal bridge small jaw and thin upper lip.	Full or partial overlap with indication for testing	deletion	EP300	22	41573399	41573401	c.5688_5689delGT	Ser1897ProfsTer3	Heterozygous	frameshift_variant	de novo	Rubinstein-Taybi Syndrome	DOMINANT	Pathogenic
00498	HIC	Female	POSITIVE	microcephaly truncal hypotonia syndactyly of the hands and right foot dysgenesis of the corpus callosum feeding difficulties failure to thrive patent ductus arteriosus and developmental delay. She has low anterior and posterior hair lines long eyelashes and bushy arched eyebrows. There are dysmorphic facial features including a depressed and broad nasal bridge small jaw and thin upper lip.	Full or partial overlap with indication for testing	SNV	NAA15	4	140281720	140281720	c.1477C>T	Gln493Ter	Heterozygous	stop_gained	de novo	NAA15-Related Syndrome	DOMINANT	Pathogenic
00498	HIC	Female	POSITIVE	microcephaly truncal hypotonia syndactyly of the hands and right foot dysgenesis of the corpus callosum feeding difficulties failure to thrive patent ductus arteriosus and developmental delay. She has low anterior and posterior hair lines long eyelashes and bushy arched eyebrows. There are dysmorphic facial features including a depressed and broad nasal bridge small jaw and thin upper lip.	Full or partial overlap with indication for testing	copy_number_variation		15	30935396	32444881	3	15q13.2-q13.3	Heterozygous	1.5 Mb	maternal	15q13.3 BP4-BP5 Duplication	DOMINANT	Pathogenic
00509	HIC	Female	See Below (Inconclusive)	gastroparesis and severe GERD chronic constipation bilateral renal reflux dysautonomia and neurocardiogenic syncope (worsening with age) recurrent infections/immunodeficiency suspected mitochondrial disease PANDAS juvenile sponyloarthriits autoimmune vulvar dystrophy/dysplasia moderate asthma hearing loss recurrent headache/migraine autistic features with obsessive compulsive disorder and food/te…	Full or partial overlap with indication for testing	SNV	SCN9A	2	167129285	167129285	c.2942T>C	Val981Ala	Heterozygous	missense_variant	unknown	SCN9A-Related Peripheral Neuropathies Associated With Increased Pain	DOMINANT	Variant of Uncertain Significance
00509	HIC	Female	See Below (Inconclusive)	gastroparesis and severe GERD chronic constipation bilateral renal reflux dysautonomia and neurocardiogenic syncope (worsening with age) recurrent infections/immunodeficiency suspected mitochondrial disease PANDAS juvenile sponyloarthriits autoimmune vulvar dystrophy/dysplasia moderate asthma hearing loss recurrent headache/migraine autistic features with obsessive compulsive disorder and food/te…	Full or partial overlap with indication for testing	SNV	GARS	7	30668227	30668227	c.1751T>A	Ile584Asn	Heterozygous	missense_variant	paternal	GARS1-Associated Axonal Neuropathy	DOMINANT	Variant of Uncertain Significance
00509	HIC	Female	See Below (Inconclusive)	gastroparesis and severe GERD chronic constipation bilateral renal reflux dysautonomia and neurocardiogenic syncope (worsening with age) recurrent infections/immunodeficiency suspected mitochondrial disease PANDAS juvenile sponyloarthriits autoimmune vulvar dystrophy/dysplasia moderate asthma hearing loss recurrent headache/migraine autistic features with obsessive compulsive disorder and food/te…	Full or partial overlap with indication for testing	SNV	MT-CYB	MT	15261	15261	c.515G>C	Ser172Thr	Homozygous	missense_variant		MT-CYB-Related Mitochondrial Disorders	MITOCHONDRIAL	Variant of Uncertain Significance
00512	HIC	Male	POSITIVE	a diagnosis of Townes-Brocks syndrome and a previously detected variant in the SALL1 gene. Additionally hearing loss arrhythmia/conduction defect low muscle tone daily body pain cannot walk long distances (uses manual wheel chair pushed by parent) chronic nausea headaches fatigue dysautonomia worsening with age and recurrent infections. He has failure to thrive and a history of extreme weight los…	Full or partial overlap with indication for testing	SNV	MYO7A	11	76867068	76867068	c.401T>A	Ile134Asn	Heterozygous	missense_variant	paternal	MYO7A-Related Disorders	RECESSIVE	Variant of Uncertain Significance
00512	HIC	Male	POSITIVE	a diagnosis of Townes-Brocks syndrome and a previously detected variant in the SALL1 gene. Additionally hearing loss arrhythmia/conduction defect low muscle tone daily body pain cannot walk long distances (uses manual wheel chair pushed by parent) chronic nausea headaches fatigue dysautonomia worsening with age and recurrent infections. He has failure to thrive and a history of extreme weight los…	Full or partial overlap with indication for testing	SNV	MYO7A	11	76890889	76890889	c.2476G>A	Ala826Thr	Heterozygous	missense_variant	maternal	MYO7A-Related Disorders	RECESSIVE	Variant of Uncertain Significance
00512	HIC	Male	POSITIVE	a diagnosis of Townes-Brocks syndrome and a previously detected variant in the SALL1 gene. Additionally hearing loss arrhythmia/conduction defect low muscle tone daily body pain cannot walk long distances (uses manual wheel chair pushed by parent) chronic nausea headaches fatigue dysautonomia worsening with age and recurrent infections. He has failure to thrive and a history of extreme weight los…	Full or partial overlap with indication for testing	SNV	COL1A2	7	94059591	94059591	c.3987T>G	Ile1329Met	Heterozygous	missense_variant	paternal	COL1A2-Related Disorders	DOMINANT	Variant of Uncertain Significance
00512	HIC	Male	POSITIVE	a diagnosis of Townes-Brocks syndrome and a previously detected variant in the SALL1 gene. Additionally hearing loss arrhythmia/conduction defect low muscle tone daily body pain cannot walk long distances (uses manual wheel chair pushed by parent) chronic nausea headaches fatigue dysautonomia worsening with age and recurrent infections. He has failure to thrive and a history of extreme weight los…	Full or partial overlap with indication for testing	SNV	MT-CYB	MT	15261	15261	c.515G>C	Ser172Thr	Homozygous	missense_variant		MT-CYB-Related Mitochondrial Disorders	MITOCHONDRIAL	Variant of Uncertain Significance
00512	HIC	Male	POSITIVE	a diagnosis of Townes-Brocks syndrome and a previously detected variant in the SALL1 gene. Additionally hearing loss arrhythmia/conduction defect low muscle tone daily body pain cannot walk long distances (uses manual wheel chair pushed by parent) chronic nausea headaches fatigue dysautonomia worsening with age and recurrent infections. He has failure to thrive and a history of extreme weight los…	Full or partial overlap with indication for testing	SNV	GARS1	7	30668227	30668227	c.1751T>A	Ile584Asn	Heterozygous	missense_variant	paternal	GARS1-Associated Axonal Neuropathy	DOMINANT	Variant of Uncertain Significance
00512	HIC	Male	POSITIVE	a diagnosis of Townes-Brocks syndrome and a previously detected variant in the SALL1 gene. Additionally hearing loss arrhythmia/conduction defect low muscle tone daily body pain cannot walk long distances (uses manual wheel chair pushed by parent) chronic nausea headaches fatigue dysautonomia worsening with age and recurrent infections. He has failure to thrive and a history of extreme weight los…	Full or partial overlap with indication for testing	deletion	SALL1	16	51175179	51175180	c.953delC	Pro318GlnfsTer24	Heterozygous	frameshift_variant	maternal	Townes-Brocks Syndrome	DOMINANT	Pathogenic
00561	HIC	Male	NEGATIVE	autism.
00626	LMIC	Female	NEGATIVE	joint hyperlaxity psychomotor delay gross motor delay tachycardia in the absence of murmurs and EMG suggestive of myopathy. Family history is significant for a similarly affected mother whose reported phenotype includes mitral valve prolapse hyperlaxity disc hernia hip subluxation and dysautonomia.
00547	HIC	Male	NEGATIVE	ventriculomegaly bilateral cystic periventricular leukomalacia with some anteromedian pseudocysts hepatosplenomegaly chronic neutropenia lymphopenia and hemophagocytosis hypotonia regression with loss of psychomotor functions ligamentous hyperlaxity and dysmorphic features including hemangioma on the scalp low-set ears bilateral epicanthus retrognathia tented mouth and hyperpigmented skin spots.
00595	LMIC	Male	POSITIVE	The proband's reported phenotype included psychomotor delay language delay mild learning difficulties seizures dysmorphic facial features short metatarsals and fetal pads.	Full or partial overlap with indication for testing	insertion	ARID1B	6	157256682	157256682	c.1972_1973dupCA	Gln658HisfsTer27	Heterozygous	frameshift_variant	de novo	Coffin-Siris Syndrome	DOMINANT	Pathogenic
00629	LMIC	Male	POSITIVE	intellectual disability psychomotor delay language delay hearing impairment stunted growth digestive problems diminished visual acuity macrocephaly high palate low-set ears single palmar crease and behavior disorder.	Full or partial overlap with indication for testing	copy_number_variation		X	108168780	109606201	0	Xq22.3-q23	Hemizygous	1.4 Mb	de novo	Xq22.3-q23 deletion	X_LINKED	Pathogenic
00582	LMIC	Female	NEGATIVE	global developmental delay and moderate intellectual disability. She has mild dysmorphic features which include fine sparse curly hair a nose with a prominent basal bridge low columella and a wide hook a large mouth and over-bite small and widely spaced teeth long tapered fingers with hypoplastic distal phalynx on fifth digits. Her weight and size are below the fifth percentile and she has an abn…
00604	LMIC	Female	POSITIVE	a history of severe intrauterine growth retardation short stature low weight poor growth moderate developmental delay and short fifth metacarpals. She is reported to be non-dysmorphic.	Full or partial overlap with indication for testing	SNV	SRCAP	16	30748691	30748691	c.7330C>T	Arg2444Ter	Heterozygous	stop_gained	de novo	Floating-Harbor Syndrome	DOMINANT	Pathogenic
00461	HIC	Male	POSITIVE	global developmental delay diffuse hypotonia abnormal brain MRI visual issues feeding difficulties constipation and a history of bilateral club feet. The proband is also described as having a high forehead bi-frontal hair recession prominent brow and deep-set eyes.	Full or partial overlap with indication for testing	SNV	DYNC1H1	14	102474581	102474581	c.5884C>T	Arg1962Cys	Heterozygous	missense_variant	de novo	DYNC1H1-related neurodevelopmental disorders	DOMINANT	Pathogenic
00461	HIC	Male	POSITIVE	global developmental delay diffuse hypotonia abnormal brain MRI visual issues feeding difficulties constipation and a history of bilateral club feet. The proband is also described as having a high forehead bi-frontal hair recession prominent brow and deep-set eyes.	Incidental Finding	copy_number_variation		11	108233807	108245056	1	11q22.3	Heterozygous	11 kb	paternal	ATM-Related Disorders	DOMINANT	Pathogenic
00548	HIC	Female	POSITIVE	short stature global developmental delay growth delay brachydactyly with digit clubbing a short hallux and hallux valgus. She was also noted to have a sacral dimple at birth Tetralogy of Fallot renal asymmetry and hypernasality. Her facial features include a wide nose short philtrum deep set eyes and thin lips.	Full or partial overlap with indication for testing	SNV	SRCAP	16	30748691	30748691	c.7330C>T	Arg2444Ter	Heterozygous	stop_gained	de novo	Floating-Harbor Syndrome	DOMINANT	Pathogenic
00406	LMIC	Male	NEGATIVE	right sided hemihypertrophy postauricular pits/creases hepatomegaly umbilical hernia diastasis of the recti muscles fifth finger clinodactyly and language delay.
00563	HIC	Female	NEGATIVE	congenital insensitivity to pain progressive Charcot hindlimb arthropathy bilateral corneal opacity and anhidrosis. She also has reduced tear production. Self mutilation as a result of the pain insensitivity has resulted in damage to her tongue buccal mucosa eyes and digits and her teeth have been removed as a preventative measure. The proband's past medical history includes respiratory stress to…
00593	LMIC	Female	POSITIVE	growth deficiency developmental delays intellectual disability cleft palate and dysmorphic features including upslanting palpebral fissures hypertelorism short anteverted nares broad columella and mild camptodactyly. She is nonverbal and described to be very fair.	Full or partial overlap with indication for testing	copy_number_variation		9	204053	695537	1	9p24.3-~pter	Heterozygous	491 kb	de novo	9p24.3 deletion	DOMINANT	Uncertain Clinical Significance
00593	LMIC	Female	POSITIVE	growth deficiency developmental delays intellectual disability cleft palate and dysmorphic features including upslanting palpebral fissures hypertelorism short anteverted nares broad columella and mild camptodactyly. She is nonverbal and described to be very fair.	Full or partial overlap with indication for testing	copy_number_variation		16	84485	5251013	3	16p13.3-~pter	Heterozygous	5.2 Mb	de novo	16p13.3 duplication syndrome	DOMINANT	Pathogenic
00597	LMIC	Male	See Below (Inconclusive)	autism spectrum disorder cognitive and speech delays hyperactivity midface hypoplasia high palate overbite with dental malpositioning retrognathia and a history of hypospadias.	Full or partial overlap with indication for testing	SNV	EP300	22	41527617	41527617	c.1508T>C	Met503Thr	Heterozygous	missense_variant	maternal	Rubinstein-Taybi Syndrome	DOMINANT	Variant of Uncertain Significance
00492	HIC	Female	See Below (Inconclusive)	seizures and global developmental delay in particular speech delay. She is also reported to have increased activity and attention deficits.	Incidental Finding	short_tandem_repeat_variation	DMPK	19	46273462	46273522			Heterozygous	short_tandem_repeat_expansion		Myotonic Dystrophy type 1	DOMINANT	Expanded
00492	HIC	Female	See Below (Inconclusive)	seizures and global developmental delay in particular speech delay. She is also reported to have increased activity and attention deficits.	Full or partial overlap with indication for testing	SNV	DYNC1H1	14	102452745	102452745	c.2183G>A	Arg728Gln	Heterozygous	missense_variant	maternal	DYNC1H1-related neurodevelopmental disorders	DOMINANT	Variant of Uncertain Significance
00531	HIC	Female	NEGATIVE	microcephaly bilateral leukocoria retinal detachments elevated TSH congenital hypothyroidism oral thrush and multifocal distribution of white matter abnormalities on MRI.
00586	LMIC	Female	POSITIVE	developmental delay seizures hypotonia and frequent respiratory tract infections. She is also noted to have strabismus bilateral fifth finger clinodactyly posteriorly rotated ears with bilateral preauricular ear pits downslanting palprebral fissures hypertelorism epicanthal folds right plagiocephaly and frontal bossing.	Full or partial overlap with indication for testing	copy_number_variation		1	235242226	237289859	1	1q42.3-q43	Heterozygous	5.8 Mb	de novo	1q4 Deletion	DOMINANT	Pathogenic
00609	LMIC	Male	POSITIVE	mild mitral valve prolapse delayed speech and walking inguinal hernia midface hypoplasia mild retrognathia hooked nose wide chest mild pectus excavatum thin fingers with marked laxity positive thumb and wrist signs flat feet with supination and atypical body proportions. He is noted to have a clinical diagnosis of Marfan syndrome.	Full or partial overlap with indication for testing	copy_number_variation		15	48744917	53851050	1	15q21.1-q21.3	Heterozygous	5.1 Mb	de novo	15q21.1 deletion	DOMINANT	Pathogenic
00667	LMIC	Male	See Below (Inconclusive)	muscular problems including hypotonia hypotrophic lower limbs and poor strength. Communication problems global developmental delay low weight failure to thrive and recurrent infections are also noted. He is also noted to have a long face strabismus and a frontal angioma.	Full or partial overlap with indication for testing	SNV	PHKA2	X	18958162	18958162	c.869G>A	Arg290His	Hemizygous	missense_variant	maternal	PHKA2-Related Phosphorylase Kinase Deficiency	X_LINKED	Variant of Uncertain Significance
00558	HIC	Male	NEGATIVE	autism spectrum disorder and attention-deficit hyperactivity disorder.
00607	LMIC	Male	POSITIVE	episodic weakness and dystonia of the arms and legs episodic posturing of the right arm epilepsy and unilateral nystagmus.	Full or partial overlap with indication for testing	SNV	ATP1A3	19	42486176	42486176	c.1076C>A	Ser359Tyr	Heterozygous	missense_variant	de novo	ATP1A3-related neurologic disorders	DOMINANT	Likely Pathogenic
00502	HIC	Female	See Below (Inconclusive)	short stature and growth hormone deficiency brachydactyly corneal dysgenesis and microspherophakia.	Full or partial overlap with indication for testing	SNV	ADAMTS17	15	100594099	100594099	c.2295+3A>G		Homozygous	splice_region_variant; intron_variant	maternal paternal	Weill-Marchesani Syndrome	RECESSIVE	Variant of Uncertain Significance
00613	HIC	Male	POSITIVE	microcephaly Pierre-Robin sequence sparse and highly arched eyebrows lowset ears skeletal abnormalities including brachydactyly sandal toe gap and possible radioulnar synostosis short stature and developmental delay. Family history is significant for an affected brother with cleft palate sandal toe gap and short stature and an affected mother with Pierre-Robin sequence skeletal abnormalities and …	Full or partial overlap with indication for testing	SNV	USP7	16	9024176	9024176	c.158A>G	Asn53Ser	Heterozygous	missense_variant	unknown (not detected in mother)	USP7-Related Neurodevelopmental Disorder	DOMINANT	Variant of Uncertain Significance
00613	HIC	Male	POSITIVE	microcephaly Pierre-Robin sequence sparse and highly arched eyebrows lowset ears skeletal abnormalities including brachydactyly sandal toe gap and possible radioulnar synostosis short stature and developmental delay. Family history is significant for an affected brother with cleft palate sandal toe gap and short stature and an affected mother with Pierre-Robin sequence skeletal abnormalities and …	Full or partial overlap with indication for testing	SNV	NIPBL	5	37020604	37020604	c.5054C>T	Thr1685Ile	Heterozygous	missense_variant	maternal	Cornelia de Lange Syndrome	DOMINANT	Variant of Uncertain Significance
00613	HIC	Male	POSITIVE	microcephaly Pierre-Robin sequence sparse and highly arched eyebrows lowset ears skeletal abnormalities including brachydactyly sandal toe gap and possible radioulnar synostosis short stature and developmental delay. Family history is significant for an affected brother with cleft palate sandal toe gap and short stature and an affected mother with Pierre-Robin sequence skeletal abnormalities and …	Full or partial overlap with indication for testing	SNV	SOX9	17	70118931	70118931	c.503A>G	Asp168Gly	Heterozygous	missense_variant	maternal	Campomelic Dysplasia	DOMINANT	Likely Pathogenic
00613	HIC	Male	POSITIVE	microcephaly Pierre-Robin sequence sparse and highly arched eyebrows lowset ears skeletal abnormalities including brachydactyly sandal toe gap and possible radioulnar synostosis short stature and developmental delay. Family history is significant for an affected brother with cleft palate sandal toe gap and short stature and an affected mother with Pierre-Robin sequence skeletal abnormalities and …	Full or partial overlap with indication for testing	copy_number_variation		21	38789355	38812821	1	21q22.13	Heterozygous	23 kb	maternal	DYRK1A-Related Intellectual Disability Syndrome	DOMINANT	Uncertain Clinical Significance
00616	HIC	Male	POSITIVE	relative macrocephaly cleft palate bilateral conductive hearing loss sandal gap toe short stature developmental delay and behavioral concerns. Family history is significant for an affected brother and mother with similar clinical features including Pierre-Robin sequence skeletal abnormalities and short stature.	Full or partial overlap with indication for testing	SNV	SOX9	17	70118931	70118931	c.503A>G	Asp168Gly	Heterozygous	missense_variant	maternal	Campomelic Dysplasia	DOMINANT	Likely Pathogenic
00616	HIC	Male	POSITIVE	relative macrocephaly cleft palate bilateral conductive hearing loss sandal gap toe short stature developmental delay and behavioral concerns. Family history is significant for an affected brother and mother with similar clinical features including Pierre-Robin sequence skeletal abnormalities and short stature.	Full or partial overlap with indication for testing	SNV	NIPBL	5	37020604	37020604	c.5054C>T	Thr1685Ile	Heterozygous	missense_variant	maternal	Cornelia de Lange Syndrome	DOMINANT	Variant of Uncertain Significance
00601	LMIC	Male	NEGATIVE	developmental delay post-natal growth deficiency exaggerated startle spasticity with stiff major joints athetoid movements microcephaly metopic ridge strabismus and mild atrophy noted on MRI.
00602	LMIC	Female	POSITIVE	includes speech and developmental delays hearing loss and dysmorphic features including a low nasal bridge anteverted nares mild epicanthal folds short neck and barrel chest.	Full or partial overlap with indication for testing	SNV	PAK1	11	77090363	77090363	c.362C>T	Pro121Leu	Heterozygous	missense_variant	de novo	PAK1-related neurodevelopmental disorders	DOMINANT	Pathogenic
00603	LMIC	Male	NEGATIVE	progressively deteriorating and painful muscle weakness diminished truncal tone mild bilateral ptosis Gowers sign when standing and sitting brisk deep tendon reflexes muscle biopsy consistent with non-inflammatory myopathy and EMG studies showing abnormal nerve conduction.
00599	LMIC	Female	NEGATIVE	global developmental delay ataxic cerebral palsy mild diffuse hypotonia nystagmus writhing movements seizures thin corpus callsoum diffuse white matter paucity and subtle right face hypertrophy.
00596	LMIC	Female	POSITIVE	ophthalmoplegia with limited eye movement ptosis pigmentary retinopathy involving the posterior pole crouched gait and very little muscle bulk. She is described to have experienced a drop in weight after her first year of life and now is slow to gain weight.	Full or partial overlap with indication for testing	SNV	KIF21A	12	39726207	39726207	c.2860C>T	Arg954Trp	Heterozygous	missense_variant	de novo	Congenital Fibrosis of the Extraocular Muscles	DOMINANT	Pathogenic
00596	LMIC	Female	POSITIVE	ophthalmoplegia with limited eye movement ptosis pigmentary retinopathy involving the posterior pole crouched gait and very little muscle bulk. She is described to have experienced a drop in weight after her first year of life and now is slow to gain weight.	Full or partial overlap with indication for testing	SNV	POLD1	19	50905998	50905998	c.970G>C	Gly324Arg	Heterozygous	missense_variant; splice_region_variant	de novo	Mandibular hypoplasia deafness progeroid features and lipodystrophy syndrome	DOMINANT	Variant of Uncertain Significance
00598	LMIC	Female	POSITIVE	The proband is noted to have a clinical diagnosis of Waardenburg syndrome including features of congenital hearing loss heterochromic irides and characteristic facial dysmorphism (hypoplastic nasal alae with high nasal bridge and smooth philtrum). The proband has additional features of IUGR failure to thrive gross motor and developmental delays low and widely spaced nipples hypoplastic labia mino…	Full or partial overlap with indication for testing	copy_number_variation		2	219743714	227164817	1	2q35-q36.3	Heterozygous	7.4 Mb	de novo	Disease Association NOS	DOMINANT	Pathogenic
00605	LMIC	Female	NEGATIVE	global developmental delay seizures and Hirschprungs disease. She is also reported to have hypotonia brisk reflexes odd eye binking prominent eyes abnormal VEPs macrosomia at birth and absent ganglion cells on colon biopsy.
00605	LMIC	Female	NEGATIVE	global developmental delay seizures and Hirschprungs disease. She is also reported to have hypotonia brisk reflexes odd eye binking prominent eyes abnormal VEPs macrosomia at birth and absent ganglion cells on colon biopsy.	Secondary Finding	SNV	APC	5	112175211	112175211	c.3920T>A	Ile1307Lys	Heterozygous	missense_variant				Pathogenic
00585	LMIC	Male	POSITIVE	profound global developmental delay and intellectual disability decreased head circumference congenital cataracts anisocoria microphthalmia nystagmus discordant eye movements hypoplastic zygomatic arches feeding difficulties a large beaked nose thin upper lip and fifth finger clinodactyly.	Full or partial overlap with indication for testing	deletion	OCRL	X	128696573	128696575	c.1060-2_1060-1delAG		Hemizygous	splice_acceptor_variant	maternal	Lowe Syndrome	X_LINKED	Likely Pathogenic
00583	LMIC	Male	POSITIVE	a diagnosis of cerebral palsy. He is noted to have ataxia spasticity no speech severe microcephaly a sleep disorder and hearing problems. He could not sit or roll at six months of age has a thin corpus callosum but otherwise normal head MRI and CT scan and does not have seizures but is constantly moving.	Full or partial overlap with indication for testing	SNV	KCNQ2	20	62076675	62076675	c.430C>G	Arg144Gly	Heterozygous	missense_variant	de novo	KCNQ2-Related Disorders	DOMINANT	Likely Pathogenic
00608	LMIC	Female	POSITIVE	a long history of tremulous and ataxic movements epilepsy developmental delay brisk deep tendon reflexes speech abnormalities and cerebral-pontine abnormality on brain MRI. Additional features include upslanting palpebral fissures bilateral fetal pads and two white marks on the left flank.	Full or partial overlap with indication for testing	SNV	CACNA1A	19	13414398	13414398	c.2137G>A	Ala713Thr	Heterozygous	missense_variant	de novo	CACNA1A-Related Disorders	DOMINANT	Pathogenic
00419	LMIC	Male	POSITIVE	The proband has clinical features of developmental delay fine motor impairment hypotonia cryptorchidism eye abnormalities dysmorphic features and joint hypermobility. Eye abnormalities include strabismus amblyopia exotropia and decreased vision. Dysmorphic features present in the proband are large forehead with bitemporal baldness small chin and long fingers.	Full or partial overlap with indication for testing	SNV	CIC	19	42791794	42791794	c.680A>G	Asn227Ser	Heterozygous	missense_variant	de novo	CIC-related neurodevelopmental disorders	DOMINANT	Likely Pathogenic
00419	LMIC	Male	POSITIVE	The proband has clinical features of developmental delay fine motor impairment hypotonia cryptorchidism eye abnormalities dysmorphic features and joint hypermobility. Eye abnormalities include strabismus amblyopia exotropia and decreased vision. Dysmorphic features present in the proband are large forehead with bitemporal baldness small chin and long fingers.	Full or partial overlap with indication for testing	SNV	NRAS	1	115256476	115256476	c.235C>T	Leu79Phe	Heterozygous	missense_variant	maternal	Noonan Syndrome	DOMINANT	Variant of Uncertain Significance
00594	LMIC	Male	POSITIVE	intractable seizures profound developmental delay microcephaly upslanting palpebral fissures deficient midface retrognathia feeding difficulties with g-tube dependence constipation scoliosis and contractures of the hands.	Full or partial overlap with indication for testing	SNV	TBL1XR1	3	176771679	176771679	c.86G>A	Gly29Asp	Heterozygous	missense_variant	de novo	TBL1XR1-related neurodevelopmental disorders including Pierpont syndrome	DOMINANT	Likely Pathogenic
00600	LMIC	Female	POSITIVE	hypertelorism camptodactyly contractures of multiple distal joints and cleft lip/palate.	Full or partial overlap with indication for testing	insertion	PRG4	1	186266028	186266028	c.23_26dupTTTA	Leu11ProfsTer31	Homozygous	frameshift_variant	maternal, unknown	Camptodactyly-Arthropathy-Coxa Vara-Pericarditis Syndrome	RECESSIVE	Likely Pathogenic
00600	LMIC	Female	POSITIVE	hypertelorism camptodactyly contractures of multiple distal joints and cleft lip/palate.	Full or partial overlap with indication for testing	SNV	MID1	X	10535200	10535200	c.388G>A	Ala130Thr	Heterozygous	missense_variant	unknown (not detected in mother)	X-linked Opitz G/BBB syndrome	X_LINKED	Likely Pathogenic
00606	LMIC	Female	See Below (Inconclusive)	learning delay motor delay language delay frequent infections congenital heart defect and heart murmur. Dysmorphic features include deep set eyes short palpebral fissures broad nasal bridge bulbous tip hypoplastic alae tapered fingers and small mouth.	Full or partial overlap with indication for testing	SNV	KMT5B	11	67926587	67926587	c.1226C>A	Thr409Lys	Heterozygous	missense_variant	maternal	KMT5B-related neurodevelopmental disorder	DOMINANT	Variant of Uncertain Significance
00606	LMIC	Female	See Below (Inconclusive)	learning delay motor delay language delay frequent infections congenital heart defect and heart murmur. Dysmorphic features include deep set eyes short palpebral fissures broad nasal bridge bulbous tip hypoplastic alae tapered fingers and small mouth.	Full or partial overlap with indication for testing	SNV	RAF1	3	12641724	12641724	c.917C>T	Ser306Leu	Heterozygous	missense_variant	paternal	Noonan Syndrome	DOMINANT	Variant of Uncertain Significance
00584	LMIC	Female	See Below (Inconclusive)	severe brain malformations including severe symmetric cortico-subcortical atrophy agenesis of corpus callosum and ex-vacuo hydrocephalus. The proband has a history of seizures beginning at four months of age microcephaly with sutures closed developmental delay retrognathia poor suck GERD hip dysplasia adducted thumbs and an atrial septal defect that closed.	Full or partial overlap with indication for testing	SNV	TANC2	17	61417571	61417571	c.1463A>G	Tyr488Cys	Heterozygous	missense_variant	unknown (not detected in mother)	TANC2-related neurodevelopmental disorder	DOMINANT	Variant of Uncertain Significance
00554	HIC	Male	See Below (Inconclusive)	severe hypotonia microcephaly distal bilateral arthrogryposis bilateral talipes calcaneovalgus bilateral microphthalmia and optic disc hypoplasia. He also presents with a single ear lobe crease clasped thumbs and bilateral syndactyly of the 2nd 3rd and 4th toes. He suffered from respiratory failure shortly after birth requiring mechanical ventilation. Brain MRI found widespread pachygyria and fro…	Full or partial overlap with indication for testing	SNV	DYNC1H1	14	102482371	102482371	c.7421C>T	Ala2474Val	Heterozygous	missense_variant	maternal	DYNC1H1-related neurodevelopmental disorders	DOMINANT	Variant of Uncertain Significance
00633	LMIC	Male	POSITIVE	global developmental delay dysmorphic syndrome hypotonia hearing impairment communication disorder low weight short stature and digestive problems. Noted dysmorphisms include facial asymmetry microcephaly micrognathia short neck blepharophimosis ptosis strabismus low-set and posteriorly rotated ears deviated nasal septum and single transverse palmar crease bilaterally.	Full or partial overlap with indication for testing	SNV	UBE3B	12	109921417	109921417	c.61G>T	Glu21Ter	Homozygous	stop_gained	maternal, unknown	Kaufman oculocerebrofacial syndrome	RECESSIVE	Pathogenic
00627	LMIC	Female	NEGATIVE	microcephaly micrognathia strabismus reduced visual acuity low-set ears mastoiditis abnormality of the pinna hypoacusia dental malfornations high palate bifid uvula genital hypoplasia spina bifida bilateral inguinal hernias persistent ductus arteriosus high-pitched voice multiple respiratory infections failure to thrive premature menarche low height and weight absence seizures intellectual disabi…
00610	LMIC	Male	POSITIVE	chronic myopathy muscular dystrophy and hypotonia. A suspicion of Klinefelter syndrome was noted by the physician.	Full or partial overlap with indication for testing	SNV	COL6A2	21	47537806	47537806	c.1072G>T	Gly358Trp	Heterozygous	missense_variant	unknown (not detected in mother)	Collagen Type VI-Related Disorders	DOMINANT	Likely Pathogenic
00610	LMIC	Male	POSITIVE	chronic myopathy muscular dystrophy and hypotonia. A suspicion of Klinefelter syndrome was noted by the physician.	Full or partial overlap with indication for testing	SNV	FBN1	15	48782200	48782200	c.2930T>G	Met977Arg	Heterozygous	missense_variant	maternal	FBN1-Related Disorders	DOMINANT	Variant of Uncertain Significance
00658	HIC	Male	POSITIVE	The proband's phenotypic features include microstomia microretrognathia microretroglossia high-arched palate choanal stenosis bilateral conductive hearing loss with external auditory canal atresia dysplastic optic nerves with deep cups other dysmorphic facial features and bilateral inguinal hernia. He is noted to have respiratory and feeding difficulties with failure to thrive and is G-tube- and …	Full or partial overlap with indication for testing	SNV	PLCB4	20	9389727	9389727	c.1862G>A	Arg621His	Heterozygous	missense_variant	paternal	Auriculocondylar Syndrome	DOMINANT	Pathogenic
00658	HIC	Male	POSITIVE	The proband's phenotypic features include microstomia microretrognathia microretroglossia high-arched palate choanal stenosis bilateral conductive hearing loss with external auditory canal atresia dysplastic optic nerves with deep cups other dysmorphic facial features and bilateral inguinal hernia. He is noted to have respiratory and feeding difficulties with failure to thrive and is G-tube- and …	Full or partial overlap with indication for testing	SNV	TAOK1	17	27844583	27844583	c.1817G>A	Arg606His	Heterozygous	missense_variant	maternal	TAOK1-related neurodevelopmental disorder	DOMINANT	Variant of Uncertain Significance
00655	HIC	Female	See Below (Inconclusive)	developmental delays ataxia proximal muscle weakness hypotonia contractures gait abnormality and polyarticular juvenile idiopathic arthritis. Additional features include atopic dermatitis livedo reticularis anxiety and shortness of breath.	Full or partial overlap with indication for testing	copy_number_variation		X	696169	1467222	3	Xp22.33	Heterozygous	771 kb	paternal	Disease Association NOS	DOMINANT	Uncertain Clinical Significance
00634	LMIC	Female	POSITIVE	global developmental delay intellectual disability communication disorder cerebellar atrophy and spinocerebellar ataxia.	Full or partial overlap with indication for testing	SNV	STXBP1	9	130427611	130427611	c.663+1G>A		Heterozygous	splice_donor_variant	de novo	STXBP1-related neurodevelopmental disorder	DOMINANT	Pathogenic
00645	HIC	Male	See Below (Inconclusive)	intractable epilepsy infantile spasms severe developmental delays hypotonia unilateral club foot bilateral optic nerve hypoplasia nystagmus esotropia g-tube dependence and atopic dermatitis.	Full or partial overlap with indication for testing	SNV	SCN3A	2	166019135	166019135	c.898G>A	Asp300Asn	Heterozygous	missense_variant	maternal	SCN3A-Related Neurodevelopmental Disorder	DOMINANT	Variant of Uncertain Significance
00661	HIC	Male	NEGATIVE	global developmental delay failure to thrive brain anomalies brain cysts (likely arachnoid) ventriculomegaly thin corpus callosum hydronephrosis dysmorphic features and repeated ear infections.
00496	HIC	Female	NEGATIVE	developmental delay alopecia and a history of epilepsy. Other phenotypes include cerebral and cerebellar atrophy scoliosis central hypotonia clinodactyly mild contractures in lower extremities feeding difficulties and GERD eczema Raynaud's phenomenon cold urticaria inverted nipples early puberty migraine constipation short stature soft velvety skin and one cafe au lait macule on the left leg.
00632	HIC	Female	POSITIVE	global developmental delay mild dysmorphism with hypertelorism strabismus left exotropia mild axial hypotonia and abnormal MRI findings suggestive of periventricular leukomalacia.	Full or partial overlap with indication for testing	copy_number_variation		15	23616095	28538904	1	15q11.2q13.1	Heterozygous	4.9 Mb	de novo	Angelman Syndrome	DOMINANT	Pathogenic
00650	LMIC	Male	POSITIVE	slowly progressive early-onset polyneuropathy with diffuse cerebellar vermis and hemisphere atrophy dysarthria scoliosis hypoesthesia areflexia overactive bladder erectile dysfunction and hypothyroidism.	Full or partial overlap with indication for testing	SNV	SETX	9	135202132	135202132	c.4853C>G	Ser1618Ter	Homozygous	stop_gained	maternal, unknown	Ataxia with Oculomotor Apraxia Type 2	RECESSIVE	Pathogenic
00642	LMIC	Female	NEGATIVE	early onset ataxia hypotonia normoreflexia and intellectual disability. She is noted to have dysarthria nystagmus apraxia and discrete telangiectasias on the face and scleras. Brain MRI showed signs of cerebellar atrophy.
00462	HIC	Female	See Below (Inconclusive)	developmental delay especially speech; autism spectrum disorder; obesity; areas of hypertrichosis with underlying palpable mass on right shin; easy bruising; occasional constipation; inverted nipples; and dysmorphic facial features including high broad forehead full lips with cupid's bow upper lip short upturned nose depressed nasal bridge synophrys deep-set eyes and arched eyebrows.	Full or partial overlap with indication for testing	SNV	KMT2D	12	49423202	49423202	c.14057A>C	Asn4686Thr	Heterozygous	missense_variant	paternal	Kabuki Syndrome - KMT2D	DOMINANT	Variant of Uncertain Significance
00668	LMIC	Female	POSITIVE	cerebellar dysarthria nystagmus dysdiadochokinesia dysmetria ataxia bilateral T2 hyperintensities in the caudate and putamen intellectual disability epilepsy aggression and psychotic episodes.	Full or partial overlap with indication for testing	deletion	TTC19	17	15907574	15907579	c.581+1_581+5delGTAAG		Homozygous	splice_donor_variant; coding_sequence_variant; intron_variant	maternal paternal	TTC19-related mitochondrial respiratory chain complex III deficiency	RECESSIVE	Likely Pathogenic
00665	LMIC	Female	POSITIVE	dysarthria nystagmus cataracts palpebral ptosis dystonia ataxia intellectual disability microcephaly bilateral T2 hyperintensities in the caudate and putamen abnormal behavior and psychotic episodes.	Full or partial overlap with indication for testing	SNV	MT-TL1	MT	3243	3243	m.3243A>G	VRF 4.8%	Heterozygous	non_coding_transcript_exon_variant	mitochondrial	Mitochondrial Encephalopathy Lactic Acidosis and Stroke-like Episodes (MELAS)	MITOCHONDRIAL	Pathogenic
00665	LMIC	Female	POSITIVE	dysarthria nystagmus cataracts palpebral ptosis dystonia ataxia intellectual disability microcephaly bilateral T2 hyperintensities in the caudate and putamen abnormal behavior and psychotic episodes.	Full or partial overlap with indication for testing	SNV	RNASET2	6	167369649	167369649	c.22G>A	Gly8Arg	Homozygous	missense_variant	maternal paternal	Leukoencephalopathy Cystic without Megalencephaly	RECESSIVE	Variant of Uncertain Significance
00665	LMIC	Female	POSITIVE	dysarthria nystagmus cataracts palpebral ptosis dystonia ataxia intellectual disability microcephaly bilateral T2 hyperintensities in the caudate and putamen abnormal behavior and psychotic episodes.	Full or partial overlap with indication for testing	deletion	TTC19	17	15907574	15907579	c.581+1_581+5delGTAAG		Homozygous	splice_donor_variant; coding_sequence_variant; intron_variant	maternal paternal	TTC19-related mitochondrial respiratory chain complex III deficiency	RECESSIVE	Likely Pathogenic
00648	LMIC	Female	See Below (Inconclusive)	a diagnosis of familial polyneuropathy with severe generalized muscular atrophy atrophy of facial muscles cramps intermittent muscular pain moderate scoliosis joint contractures in both knees and heels pes equinovarus deformities severe distal weakness hypesthesia and generalized areflexia.	Full or partial overlap with indication for testing	SNV	IGHMBP2	11	68702771	68702771	c.1637A>C	Asp546Ala	Homozygous	missense_variant	maternal, unknown	IGHMBP2-related neuronopathy	RECESSIVE	Variant of Uncertain Significance
00664	LMIC	Female	See Below (Inconclusive)	early-onset ataxia dysarthria bilaterlal pes cavus dysmetry fasciculations areflexia and neuropathic pain in upper limbs hypperreflexia hypopalestesia and spasticity in lower limbs.	Full or partial overlap with indication for testing	SNV	VCP	9	35061022	35061022	c.1349A>T	Asp450Val	Heterozygous	missense_variant	unknown (not detected in mother)	VCP-related multisystem proteinopathy	DOMINANT	Variant of Uncertain Significance
00664	LMIC	Female	See Below (Inconclusive)	early-onset ataxia dysarthria bilaterlal pes cavus dysmetry fasciculations areflexia and neuropathic pain in upper limbs hypperreflexia hypopalestesia and spasticity in lower limbs.	Full or partial overlap with indication for testing	copy_number_variation	HARS1	5	140060429	140070831	1	5q31.3	Heterozygous	10 kb	unknown (not detected in mother)	Charcot-Marie-Tooth Type 2	DOMINANT	Uncertain Clinical Significance
00567	HIC	Male	See Below (Inconclusive)	microcephaly congenital brain malformations including bilateral porecephalic cysts and decreased parenchymal volume congenital hypotonia and seizures. Notable dysmorphic features include low-set and posteriorly-rotated ears high arched palate retrognathia micrognathia and a depressed nasal bridge.	Full or partial overlap with indication for testing	SNV	MID1	X	10535481	10535481	c.107G>A	Arg36His	Hemizygous	missense_variant	maternal	X-linked Opitz G/BBB syndrome	X_LINKED	Variant of Uncertain Significance
00567	HIC	Male	See Below (Inconclusive)	microcephaly congenital brain malformations including bilateral porecephalic cysts and decreased parenchymal volume congenital hypotonia and seizures. Notable dysmorphic features include low-set and posteriorly-rotated ears high arched palate retrognathia micrognathia and a depressed nasal bridge.	Full or partial overlap with indication for testing	SNV	FLVCR1	1	213046155	213046155	c.1019C>T	Thr340Ile	Heterozygous	missense_variant	maternal	Posterior Column Ataxia with Retinitis Pigmentosa	RECESSIVE	Variant of Uncertain Significance
00567	HIC	Male	See Below (Inconclusive)	microcephaly congenital brain malformations including bilateral porecephalic cysts and decreased parenchymal volume congenital hypotonia and seizures. Notable dysmorphic features include low-set and posteriorly-rotated ears high arched palate retrognathia micrognathia and a depressed nasal bridge.	Full or partial overlap with indication for testing	deletion	FLVCR1	1	213037081	213037082	c.755delG	Gly252AlafsTer8	Heterozygous	frameshift_variant	paternal	Posterior Column Ataxia with Retinitis Pigmentosa	RECESSIVE	Likely Pathogenic
00673	HIC	Female	See Below (Inconclusive)	The proband's clinical features include global developmental delays short stature microcephaly cerebellar hypoplasia seizures antral web poor weight gain and dysmorphic features such as midface hypoplasia thin upper lip anteverted nares broad nasal bridge long and flat philtrum hypertelorism downslanting palpebral fissures low set ears and cupped/simple ears and high arched palate. Intermittent n…	Full or partial overlap with indication for testing	SNV	TSC1	9	135778026	135778026	c.2357G>A	Arg786Gln	Heterozygous	missense_variant	de novo	Tuberous Sclerosis Complex	DOMINANT	Variant of Uncertain Significance
00533	HIC	Male	See Below (Inconclusive)	obesity developmental delay with speech delay behavioral concerns including fearfulness and anxiety elevated ALT constipation hyperphagia and eczema. The proband also presents with facial dysmorphism including bitemporal narrowing thin upper lip smooth philtrum and low-set posteriorly-rotated simple/cupped ears with a hemangioma on the right superior helix. His height is noted to be at the 3rd pe…	Full or partial overlap with indication for testing	SNV	FBN1	15	48766811	48766811	c.4001G>A	Gly1334Asp	Heterozygous	missense_variant	paternal	FBN1-Related Disorders	DOMINANT	Variant of Uncertain Significance
00672	HIC	Male	NEGATIVE	a history of night seizures learning disability and ADHD. His reported phenotype includes peripheral vision loss anxiety chronic back pain constipation convulsions dizziness frequent headaches frontal lobe epilepsy nocturnal enuresis and parsomnia. Dysmorphic features include malar flattening deep set eyes broad uvula skin hyperextensibility and striae clinodactyly isolated hypertrichosis and arc…
00644	HIC	Female	See Below (Inconclusive)	global developmental delay and cognitive impairment spastic quadriplegic cerebral palsy multiple congenital structural brain anomalies macrocephaly seizures optic disc pallor multiple dermal and cerebral venous malformations and g-tube dependence.	Full or partial overlap with indication for testing	SNV	SPTBN4	19	41029399	41029399	c.3710C>G	Ala1237Gly	Heterozygous	missense_variant	unknown (not detected in mother)	SPTBN4-Related Neurodevelopmental Disorder	RECESSIVE	Variant of Uncertain Significance
00644	HIC	Female	See Below (Inconclusive)	global developmental delay and cognitive impairment spastic quadriplegic cerebral palsy multiple congenital structural brain anomalies macrocephaly seizures optic disc pallor multiple dermal and cerebral venous malformations and g-tube dependence.	Full or partial overlap with indication for testing	SNV	SPTBN4	19	41025847	41025847	c.3443G>C	Arg1148Pro	Heterozygous	missense_variant	unknown (not detected in mother)	SPTBN4-Related Neurodevelopmental Disorder	RECESSIVE	Variant of Uncertain Significance
00463	HIC	Male	NEGATIVE	chronic diarrhea and vomiting failure to thrive hypocholesterolemia anemia hyperchloremic metabolic acidosis and low fat-soluble vitamins. Improvement of GI symptoms was observed on low-fat diet and supplemental fat-soluble vitamins. Family history is significant for two older siblings with similar features of cerebellar ataxia cerebellar atrophy neurodevelopmental delay hypotonia and ocular find…
00524	LMIC	Female	NEGATIVE	mild intellectual disability microcephaly midface retrusion low set ears low set nipples pectus excavatum hypoplastic thumbs left hydronephrosis recurrent urinary tract infections one cafe-au-lait spot and one hypochromic macule.
00670	HIC	Female	See Below (Inconclusive)	global developmental delay abnormal MRI encephalopathy migraines paroxysmal spells cortical visual impairment hypotonicity dysmorphic features congenital hypothyroidism delayed puberty osteoporosis kyphosis feeding difficulties GERD and sparse eyebrows.	Full or partial overlap with indication for testing	SNV	SGSH	17	78184270	78184270	c.1490C>T	Pro497Leu	Heterozygous	missense_variant	maternal	Mucopolysaccharidosis Type III	RECESSIVE	Variant of Uncertain Significance
00670	HIC	Female	See Below (Inconclusive)	global developmental delay abnormal MRI encephalopathy migraines paroxysmal spells cortical visual impairment hypotonicity dysmorphic features congenital hypothyroidism delayed puberty osteoporosis kyphosis feeding difficulties GERD and sparse eyebrows.	Full or partial overlap with indication for testing	SNV	SGSH	17	78187976	78187976	c.658G>C	Val220Leu	Heterozygous	missense_variant	paternal	Mucopolysaccharidosis Type III	RECESSIVE	Variant of Uncertain Significance
00700	HIC	Female	POSITIVE	global developmental delay adducted thumbs broad great toes with small nails and facial gestalt that includes hooded eyes with downslanting palpebral fissures epicanthal folds full cheeks prominent nasolabial folds broad nasal root with bulbous tip prominent philtrum and retrognathia.	Full or partial overlap with indication for testing	SNV	KCNH1	1	211093374	211093374	c.1070G>A	Arg357Gln	Heterozygous	missense_variant	de novo	KCNH1-Related Disorders	DOMINANT	Pathogenic
00677	HIC	Female	POSITIVE	short stature mild learning difficulties brachydactyly with prominent thumbs and toes shortened long bones mild platyspondylia marked shortening of the metacarpals and a history of small for gestational age. Dysmorphic features include low-hanging columella hypertelorism low-set but normally formed ears frontal bossing deep set eyes high arched eyebrows curly eyelashes bulbous nasal tip short phi…	Full or partial overlap with indication for testing	SNV	FBXW11	5	171305130	171305130	c.793T>C	Trp265Arg	Heterozygous	missense_variant	maternal	FBXW11-related neurodevelopmental brain eye and digit anomalies	DOMINANT	Likely Pathogenic
00442	HIC	Female	NEGATIVE	developmental delay autism seizures amblyopia and nystagmus.
00549	HIC	Male	POSITIVE	global developmental delay intellectual disability absent speech growth delay microcephaly tetralogy of Fallot at birth bilateral cryptorchidism and dysmorphic features including tubular nose alae nasi hypoplasia long smooth philtrum thin upper lip arched eyebrows hypertelorism low set crumpled ears severe flat valgus foot bilateral hallux valgus and scapula alata.	Full or partial overlap with indication for testing	SNV	PACS1	11	65978677	65978677	c.607C>T	Arg203Trp	Heterozygous	missense_variant	de novo	PACS1-Related Syndrome	DOMINANT	Pathogenic
00544	HIC	Female	POSITIVE	progressive microcephaly a thin and unmyelinated corpus callosum and enlarged ventricles noted through MRI. She also presents with axial hypotonia severe psychomotor delay reduced motor activity positional plagiocephaly one cafe au lait spot and abnormalities in plasma and urine organic acids including increased lactic acid and pyruvic acid.	Full or partial overlap with indication for testing	insertion	PDHA1	X	19377737	19377737	c.1142_1145dupATCA	Trp383SerfsTer6	Heterozygous	frameshift_variant	de novo	Pyruvate Dehydrogenase Deficiency	X_LINKED	Pathogenic
00617	HIC	Female	NEGATIVE	includes developmental delay with expressive language delay hyperinsulinism and hypoglycemia aortopathy multiple simple renal cysts mixed hearing loss and malocclusion.
00448	HIC	Female	NEGATIVE	respiratory distress failure to thrive pancreatic insufficiency neonatal infections dysphagia Hirschsprung's disease duplicating collecting ducts in left kidney hydronephrosis hypokalemia necrotizing enterocolitis metabolic acidosis leukocytosis and anemia. The proband also presents with neurological deterioration abnormal eye movement decreased limb movement abnormal brain MRI and patent foramen…
00631	HIC	Female	POSITIVE	cognitive and motor regression that began around one year of age hypotonia spasticity ataxia coxa valga GERD constipation sleep difficulties nystagmus strabismus mild hypertelorism and shortened midface and diffuse cerebellar atrophy and suspicion for globus pallidus signal abnormalities on brain imaging.	Full or partial overlap with indication for testing	SNV	PLA2G6	22	38511665	38511665	c.1903C>T	Arg635Ter	Heterozygous	stop_gained	paternal	PLA2G6-Associated Neurodegeneration	RECESSIVE	Pathogenic
00631	HIC	Female	POSITIVE	cognitive and motor regression that began around one year of age hypotonia spasticity ataxia coxa valga GERD constipation sleep difficulties nystagmus strabismus mild hypertelorism and shortened midface and diffuse cerebellar atrophy and suspicion for globus pallidus signal abnormalities on brain imaging.	Full or partial overlap with indication for testing	SNV	PLA2G6	22	38509489	38509489	c.2202+5G>A		Heterozygous	splice_region_variant; intron_variant	maternal	PLA2G6-Associated Neurodegeneration	RECESSIVE	Variant of Uncertain Significance
00557	HIC	Male	POSITIVE	ADHD 22q11 monosomy syndrome	Full or partial overlap with indication for testing	copy_number_variation		22	18889691	21465485	1	22q11.21	Heterozygous	2.6 Mb	de novo	22q11.2 Deletion Syndrome	DOMINANT	Pathogenic
00669	HIC	Female	POSITIVE	hypotonia feeding difficulties global developmental delays sleep apnea contractures myoclonus in the upper extremities mild facial and finger twitching torticollis acquired positional plagiocephaly facial droop depressed nasal bridge wide philtrum tented upper lip with cupid's bow microretrognathia high arched palate inverted nipples and overlapping third and fourth toes on left foot. She also ha…	Full or partial overlap with indication for testing	SNV	PAX7	1	19062463	19062463	c.1493T>G	Val498Gly	Heterozygous	missense_variant	paternal	Congenital myopathy with scoliosis	RECESSIVE	Variant of Uncertain Significance
00669	HIC	Female	POSITIVE	hypotonia feeding difficulties global developmental delays sleep apnea contractures myoclonus in the upper extremities mild facial and finger twitching torticollis acquired positional plagiocephaly facial droop depressed nasal bridge wide philtrum tented upper lip with cupid's bow microretrognathia high arched palate inverted nipples and overlapping third and fourth toes on left foot. She also ha…	Full or partial overlap with indication for testing	SNV	PAX7	1	19018305	19018305	c.644G>A	Arg215His	Heterozygous	missense_variant	maternal	Congenital myopathy with scoliosis	RECESSIVE	Variant of Uncertain Significance
00669	HIC	Female	POSITIVE	hypotonia feeding difficulties global developmental delays sleep apnea contractures myoclonus in the upper extremities mild facial and finger twitching torticollis acquired positional plagiocephaly facial droop depressed nasal bridge wide philtrum tented upper lip with cupid's bow microretrognathia high arched palate inverted nipples and overlapping third and fourth toes on left foot. She also ha…	Full or partial overlap with indication for testing	SNV	KCNK9	8	140630920	140630920	c.706G>A	Gly236Arg	Heterozygous	missense_variant	de novo	KCNK9-Imprinting Syndrome	DOMINANT	Pathogenic
00630	HIC	Female	NEGATIVE	suspected leukodystrophy global developmental delay and neurocognitive defects and regression with dyslexia ADHD and anxiety.
00505	LMIC	Female	POSITIVE	skeletal abnormalities including short trunk and short limbs metaphyseal irregularity lordosis platyspondyly scoliosis odontoid hypoplasia and C1-C2 subluxation. She also presents with a cleft palate myopia and protuberant abdomen.	Full or partial overlap with indication for testing	SNV	COL2A1	12	48377212	48377212	c.2005G>A	Gly669Ser	Heterozygous	missense_variant	de novo	COL2A1-Related Disorders	DOMINANT	Likely Pathogenic
00695	HIC	Female	NEGATIVE	severe periorbital facial swelling where the affected tissue has xanthoma-like appearance. She also has fibromyalgia scoliosis anemia blue scarring and history of nails yellowing and falling off.
00638	LMIC	Male	POSITIVE	early onset generalized dystonia hyperreflexia knee pain cramping and bilateral renal hydronephrosis.	Full or partial overlap with indication for testing	copy_number_variation		14	55343414	55414889	1	14q22.2	Heterozygous	71 kb	unknown	Dopa-Responsive Dystonia	DOMINANT	Pathogenic
00659	HIC	Male	POSITIVE	developmental delay chronic constipation possible hypolacrima metatarsus adductus short stature macrocephaly and dysmorphic facial features.	Full or partial overlap with indication for testing	insertion	MED13L	12	116445363	116445363	c.2090_2091insGAGCCACT	Asp697GlufsTer19	Heterozygous	frameshift_variant	de novo	MED13L-related neurodevelopmental disorder	DOMINANT	Pathogenic
00457	HIC	Male	See Below (Inconclusive)	macrocephaly autism spectrum disorder developmental delays with no regression deficient verbal abilities impaired attention and impulse control impaired problem solving skills poor sleep sensory issues with lower limbs anxiety ADHD behavioral issues (pulling out of eyelashes) increased deep tendon reflexes epilepsy (generalised seizure disorder) epistaxis urinary incontinence one cafe au lait mac…	Full or partial overlap with indication for testing	SNV	FBN1	15	48707755	48707755	c.8029G>A	Gly2677Ser	Heterozygous	missense_variant	maternal	Acromicric Dysplasia	DOMINANT	Variant of Uncertain Significance
00457	HIC	Male	See Below (Inconclusive)	macrocephaly autism spectrum disorder developmental delays with no regression deficient verbal abilities impaired attention and impulse control impaired problem solving skills poor sleep sensory issues with lower limbs anxiety ADHD behavioral issues (pulling out of eyelashes) increased deep tendon reflexes epilepsy (generalised seizure disorder) epistaxis urinary incontinence one cafe au lait mac…	Full or partial overlap with indication for testing	SNV	SHANK3	22	51121801	51121801	c.919G>T	Ala307Ser	Heterozygous	missense_variant	maternal	Phelan-McDermid Syndrome	DOMINANT	Variant of Uncertain Significance
00641	LMIC	Female	POSITIVE	early-onset polyneuropathy psychomotor delay nystagmus hypotonia atrophy scoliosis and bilateral foot drop. Family history is significant for a deceased affected brother.	Full or partial overlap with indication for testing	SNV	GAN	16	81388361	81388361	c.633+1G>A		Homozygous	splice_donor_variant	maternal paternal	Giant Axonal Neuropathy	RECESSIVE	Likely Pathogenic
00503	LMIC	Female	POSITIVE	a round face full cheeks epicanthus broad nose micrognathia osteopenia brachydactyly of hands and feet short metatarsal and metacarpal genu varum pain in knees mild gastroesophageal reflux asthma hypothyroidism hypocalcemia hyperphosphatemia elevated serum parathyroid hormone dermal calcifications and short stature.	Full or partial overlap with indication for testing	SNV	GNAS	20	57466921	57466921	c.139+1G>C		Heterozygous	splice_donor_variant	maternal	Disorders of GNAS Inactivation	DOMINANT	Pathogenic
00647	HIC	Female	See Below (Inconclusive)	global developmental delay autism spectrum disorder generalized epilepsy autonomic neuropathy microcephaly short stature low muscle tone of the lower extremities receptive and expressive speech delay oral dysphagia and problems with sensory discrimination and sensory processing. She has double jointed elbows fine hair poor dentition and gingivitis heat intolerance hypohidrosis vomiting dizziness …	Full or partial overlap with indication for testing	SNV	SYNGAP1				c.407G>C	Arg136Pro	Heterozygous	missense_variant	maternal	SYNGAP1-related complex neurodevelopmental disorders	DOMINANT	Variant of Uncertain Significance
00647	HIC	Female	See Below (Inconclusive)	global developmental delay autism spectrum disorder generalized epilepsy autonomic neuropathy microcephaly short stature low muscle tone of the lower extremities receptive and expressive speech delay oral dysphagia and problems with sensory discrimination and sensory processing. She has double jointed elbows fine hair poor dentition and gingivitis heat intolerance hypohidrosis vomiting dizziness …	Full or partial overlap with indication for testing	SNV	KANSL1	17	44248674	44248674	c.836A>T	Asp279Val	Heterozygous	missense_variant	maternal	Koolen-de Vries syndrome	DOMINANT	Variant of Uncertain Significance
00473	HIC	Male	See Below (Inconclusive)	autism spectrum disorder mixed receptive-expressive language disorder explosive personality disorder generalized anxiety disorder epistaxis hypotonia diarrhea and hypercalcemia/hyperkalemia now resolving. Minor dysmorphic features include dolichocephaly long facial profile bitemporal narrowing high palate single palmar crease 5th finger clinodactyly mild 2-3 toe syndactyly and 5th toe clinodactyl…	Full or partial overlap with indication for testing	SNV	KANSL1	17	44248674	44248674	c.836A>T	Asp279Val	Heterozygous	missense_variant	maternal	Koolen-de Vries syndrome	DOMINANT	Variant of Uncertain Significance
00663	HIC	Male	POSITIVE	infantile-onset Pompe disease with severe multisystem involvement. a myopathic facies with large ears a small mouth depressed nasal bridge and bulbous tip increasing head circumference and silent aspiration with feeding difficulties. He has expressive language delay gross motor delay osteopenia hypermobility and hypotonia. He has dilated cardiomyopathy secondary to Pompe as well as a history of r…	Full or partial overlap with indication for testing	deletion	GAA	17	78078909	78078910	c.2481+102_2646+31del	Gly828_Asn882de	Heterozygous	deletion	maternal	Glycogen Storage Disease Type II	RECESSIVE	Pathogenic
00663	HIC	Male	POSITIVE	infantile-onset Pompe disease with severe multisystem involvement. a myopathic facies with large ears a small mouth depressed nasal bridge and bulbous tip increasing head circumference and silent aspiration with feeding difficulties. He has expressive language delay gross motor delay osteopenia hypermobility and hypotonia. He has dilated cardiomyopathy secondary to Pompe as well as a history of r…	Full or partial overlap with indication for testing	deletion	GAA	17	78078909	78078910	c.525delT	Glu176ArgfsTer45	Heterozygous	frameshift_variant	maternal	Glycogen Storage Disease Type II	RECESSIVE	Pathogenic
00639	LMIC	Male	POSITIVE	early onset muscular dystrophy generalized muscular atrophy myopathy without denervation short stature joint contractures scoliosis rigid spine restricted respiration and sinus arrhythmia with a first degree AV block.	Full or partial overlap with indication for testing	SNV	LMNA	1	156106204	156106204	c.1357C>T	Arg453Trp	Heterozygous	missense_variant	unknown (not detected in mother)	LMNA-Related Muscle Diseases	DOMINANT	Pathogenic
00639	LMIC	Male	POSITIVE	early onset muscular dystrophy generalized muscular atrophy myopathy without denervation short stature joint contractures scoliosis rigid spine restricted respiration and sinus arrhythmia with a first degree AV block.	Incidental Finding	deletion	ATM	11	108175552	108175560	c.5650_5657delACAACCCC	Thr1884CysfsTer17	Heterozygous	frameshift_variant	unknown (not detected in mother)	ATM-Related Cancer Susceptibility	DOMINANT	Likely Pathogenic
00614	HIC	Male	POSITIVE	mild dysmorphic features and a prolonged seizure in the setting of pneumonia and subsequent developmental regression loss of ability to walk and talk encephalopathy dystonia and chorea.	Full or partial overlap with indication for testing	copy_number_variation		17	34815466	36249366	3	17q12	Heterozygous	1.4 Mb	unknown (not detected in mother)	17q12 Duplication Syndrome	DOMINANT	Pathogenic
00666	HIC	Male	NEGATIVE	includes saggital suture synostosis speech delay velopharyngeal insufficiency macrocephaly mild latent hyperopia macular hypopigmentation mild convergence insufficiency facial dysmorphic features including oligodontia with abnormal enamel/dentin micrognathia hypertelorism long down-slanting palpebral fissures posteriorly rotated ears broad and large nose and small mouth.
00651	LMIC	Male	NEGATIVE	early onset laryngeal dystonia and lumbar hyperlordosis.
00528	HIC	Female	POSITIVE	global developmental delay hypotonia feeding problems sensorimotor polyneuropathy delayed visual maturation optic nerve atrophy esotropia astigmatism neuromuscular hip dysplasia and scoliosis bilateral contractures of lower limbs abnormal EEG and acute episodes of abnormal involuntary movements and myoclonus. Family history is significant for a younger sister with similar but less severe symptoms.	Full or partial overlap with indication for testing	SNV	TIMMDC1	3	119234712	119234712	c.597-1340A>G		Homozygous	intron_variant	maternal paternal	TIMMDC1-related mitochondrial complex I deficiency	RECESSIVE	Pathogenic
00671	HIC	Female	NEGATIVE	ataxia expressive speech delay and epilepsy.
00556	HIC	Female	NEGATIVE	autism spectrum disorder seizures expressive language problems and oral fixation.
00692	HIC	Male	POSITIVE	progressive movement disorder with chorea tremor ataxia dyspraxia poor fine-motor skills continuous movements of tongue and extremities and muscle soreness and stiffness with wide-based gait. He is also reported to have ADHD a history of tethered cord pes planus pes cavus and mild pectus excavatum.	Full or partial overlap with indication for testing	short_tandem_repeat_variation	FXN	9	71652202	71652220	GAA		Heterozygous	short_tandem_repeat_expansion		Friedreich ataxia	RECESSIVE	Expanded
00692	HIC	Male	POSITIVE	progressive movement disorder with chorea tremor ataxia dyspraxia poor fine-motor skills continuous movements of tongue and extremities and muscle soreness and stiffness with wide-based gait. He is also reported to have ADHD a history of tethered cord pes planus pes cavus and mild pectus excavatum.	Full or partial overlap with indication for testing	short_tandem_repeat_variation	FXN	9	71652202	71652220	GAA		Heterozygous	short_tandem_repeat_expansion		Friedreich ataxia	RECESSIVE	Expanded
00643	LMIC	Male	POSITIVE	early onset spastic paraplegia hyperreflexia ataxia decreased strength motor axonal polyneuropathy cognitive impairment and hypoplasia of the corpus callosum. The proband is noted to have a similarly affected older brother.	Full or partial overlap with indication for testing	deletion	SPG11	15	44898277	44898279	c.3464_3465delCC	Pro1155LeufsTer2	Heterozygous	frameshift_variant	paternal	SPG11-Related Spastic Paraplegia	RECESSIVE	Pathogenic
00643	LMIC	Male	POSITIVE	early onset spastic paraplegia hyperreflexia ataxia decreased strength motor axonal polyneuropathy cognitive impairment and hypoplasia of the corpus callosum. The proband is noted to have a similarly affected older brother.	Full or partial overlap with indication for testing	deletion	SPG11	15	44867113	44867117	c.5989_5992delCTGT	Leu1997MetfsTer60	Heterozygous	frameshift_variant	maternal	SPG11-Related Spastic Paraplegia	RECESSIVE	Pathogenic
00660	HIC	Male	POSITIVE	developmental delay intellectual disability short and webbed neck stable aortic root dilation dysmorphic facial features and behavioral issues.	Full or partial overlap with indication for testing	SNV	TRIO	5	14368833	14368833	c.2891C>T	Ala964Val	Heterozygous	missense_variant	unknown (not detected in mother)	TRIO-Related Intellectual Disability	DOMINANT	Variant of Uncertain Significance
00660	HIC	Male	POSITIVE	developmental delay intellectual disability short and webbed neck stable aortic root dilation dysmorphic facial features and behavioral issues.	Full or partial overlap with indication for testing	deletion	ADNP	20	49510708	49510712	c.539_542delTTAG	Val180GlyfsTer17	Heterozygous	frameshift_variant	unknown (not detected in mother)	ADNP-Related Neurodevelopmental Disorder	DOMINANT	Pathogenic
00657	HIC	Male	NEGATIVE	The proband's reported phenotype include developmental delays moderate intellectual disability behavioral and emotional difficulties seizure disorder mild dystonia proportionate short stature and microcephaly malar flattening short philtrum tented lip microretrognathia with marked maxillary prognathism mild pectus abnormality bilateral achilles tendon contractures micropenis feeding difficulties …
00697	HIC	Female	POSITIVE	blond fundus concerning for ocular albinism foveal hypoplasia bilateral optic nerve dysplasia/hypoplasia and hypopigmented skin.	Full or partial overlap with indication for testing	SNV	OCA2	15	28171315	28171315	c.2037G>C	Trp679Cys	Heterozygous	missense_variant	maternal	Oculocutaneous Albinism Type 2	RECESSIVE	Likely Pathogenic
00697	HIC	Female	POSITIVE	blond fundus concerning for ocular albinism foveal hypoplasia bilateral optic nerve dysplasia/hypoplasia and hypopigmented skin.	Full or partial overlap with indication for testing	SNV	OCA2	15	28230255	28230255	c.1319T>C	Leu440Ser	Heterozygous	missense_variant	paternal	Oculocutaneous Albinism Type 2	RECESSIVE	Likely Pathogenic
00656	HIC	Male	POSITIVE	prematurity congenital hypotonia short stature mildly dysmorphic facial features hyperopia phimosis schawl scrotum bilateral pes planus small joint hypermobility attention deficit hyperactivty disorder anxiety depression expressive language disorder borderline intellectual disability and migraines.	Full or partial overlap with indication for testing	SNV	PTPN11	12	112926851	112926851	c.1471C>A	Pro491Thr	Heterozygous	missense_variant	de novo	Noonan Syndrome	DOMINANT	Pathogenic
00656	HIC	Male	POSITIVE	prematurity congenital hypotonia short stature mildly dysmorphic facial features hyperopia phimosis schawl scrotum bilateral pes planus small joint hypermobility attention deficit hyperactivty disorder anxiety depression expressive language disorder borderline intellectual disability and migraines.	Full or partial overlap with indication for testing	copy_number_variation		7	113923511	113933967	1	7q31.1	Heterozygous	10 kb	paternal	FOXP2-related speech and language disorders	DOMINANT	Uncertain Clinical Significance
00474	HIC	Male	See Below (Inconclusive)	idiopathic scoliosis headaches pityriasis lichenoides chronica attention deficit hyperactivity disorder anxiety and mixed receptive-expressive language disorder.	Full or partial overlap with indication for testing	SNV	ACVR1	2	158617583	158617583	c.1073C>A	Ala358Glu	Heterozygous	missense_variant	maternal	Fibrodysplasia Ossificans Progressiva	DOMINANT	Variant of Uncertain Significance
00474	HIC	Male	See Below (Inconclusive)	idiopathic scoliosis headaches pityriasis lichenoides chronica attention deficit hyperactivity disorder anxiety and mixed receptive-expressive language disorder.	Full or partial overlap with indication for testing	copy_number_variation		7	113923511	113933967	1	7q31.1	Heterozygous	10 kb	paternal	FOXP2-related speech and language disorders	DOMINANT	Uncertain Clinical Significance
00676	HIC	Male	POSITIVE	encephalopathy characterized by global developmental delay and a generalized epilepsy. The proband's phenotype also includes features of autism spectrum disorder and hyperactivity a sacral dimple dysmorphic features which include short distal phalanges 5th finger clindactyly and mild cutaneous syndactyly between 4th and 5th fingers wide feet relative microcephaly a tall flat forehead pronounced e…	Full or partial overlap with indication for testing	SNV	CREBBP	16	3830733	3830733	c.1823T>C	Leu608Pro	Heterozygous	missense_variant; splice_region_variant	de novo	Rubinstein-Taybi Syndrome	DOMINANT	Likely Pathogenic
00691	HIC	Male	See Below (Inconclusive)	developmental delay autism spectrum disorder and epilepsy with regression. Brain MRI revealed generalized mild brain volume loss with prominent ventricles. The proband is also noted to have bilateral hypermetropia astigmatism strabismic amblyopia and esotropia.	Full or partial overlap with indication for testing	SNV	POLG	15	89873415	89873415	c.752C>T	Thr251Ile	Heterozygous	missense_variant	paternal	POLG-Related Spectrum Disorders	RECESSIVE	Pathogenic
00691	HIC	Male	See Below (Inconclusive)	developmental delay autism spectrum disorder and epilepsy with regression. Brain MRI revealed generalized mild brain volume loss with prominent ventricles. The proband is also noted to have bilateral hypermetropia astigmatism strabismic amblyopia and esotropia.	Full or partial overlap with indication for testing	SNV	POLG2	17	62476406	62476406	c.1292A>G	Lys431Arg	Heterozygous	missense_variant; splice_region_variant	maternal	POLG2-Related Spectrum Disorders	RECESSIVE	Variant of Uncertain Significance
00691	HIC	Male	See Below (Inconclusive)	developmental delay autism spectrum disorder and epilepsy with regression. Brain MRI revealed generalized mild brain volume loss with prominent ventricles. The proband is also noted to have bilateral hypermetropia astigmatism strabismic amblyopia and esotropia.	Full or partial overlap with indication for testing	SNV	POLG	15	89868870	89868870	c.1760C>T	Pro587Leu	Heterozygous	missense_variant	paternal	POLG-Related Spectrum Disorders	RECESSIVE	Pathogenic
00646	HIC	Male	NEGATIVE	bilateral cleft lip and palate developmental delay significant hyperopia and right esotropia profound hearing loss (left ear) and severe hearing loss with mixed component (right ear) cranial nerve VII palsy supernumerary tooth in palate dysplastic pulmonary valve with pulmonary valve stenosis and mild pulmonic valve insufficiency constipation reflux dysphagia microphallus shawl scrotum platelet s…
00562	HIC	Male	See Below (Inconclusive)	autism spectrum disorder and speech delay. Additional features include prominent ears long face and narrow chin.	Full or partial overlap with indication for testing	deletion	RIMS1	6	72891984	72891988	c.815_818delAGAA	Lys272ArgfsTer14	Heterozygous	splice_acceptor_variant; coding_sequence_variant	unknown	Disease Association NOS	DOMINANT	Variant of Uncertain Significance
00689	HIC	Female	NEGATIVE	bilateral medullary nephrocalcinosis and severe hypertension.
00690	HIC	Female	POSITIVE	a history of intractable epilepsy from four years of age gray matter heterotropia developmental coordination disorder gross and fine motor delays intellectual disability and behavioral features consistent with ADHD. Post-onset of seizures the proband has end point tremor abnormal gait problems with balance with frequent falls and concern for cognitive decline. The proband also presents with recur…	Full or partial overlap with indication for testing	SNV	MED13L	12	116457043	116457043	c.995A>G	Glu332Gly	Heterozygous	missense_variant	de novo	MED13L-related neurodevelopmental disorder	DOMINANT	Likely Pathogenic
00551	HIC	Male	NEGATIVE	a cerebellar disorder congenital torticollis macrocephaly plagiocephaly prominent forehead gross motor delay learning disability and muscle weakness.
00551	HIC	Male	NEGATIVE	a cerebellar disorder congenital torticollis macrocephaly plagiocephaly prominent forehead gross motor delay learning disability and muscle weakness.	Secondary Finding	SNV	SCN5A	3	38592986	38592986	c.4877G>A	Arg1626His	Heterozygous	missense_variant				Likely Pathogenic
00674	HIC	Male	NEGATIVE	macrocephaly trigonocephaly short stature eye anterior chamber malformation congenital glaucoma wrinkled abdominal wall and mild dysmorphic features including elongated nose hypoplastic nares short philtrum thin lips and hypoplastic distal digits.
00724	HIC	Female	NEGATIVE	global developmental delay hypotonia epilepsy abnormal skin pigmentation feeding difficulties failure to thrive hearing loss sleep difficulties levoscoliosis and constipation.
00684	HIC	Male	See Below (Inconclusive)	global developmental delay with gross motor and speech delays craniosynostosis of sagittal suture mild dilation of aortic sinuses of Valsalva prolapsed mitral valve left clubfoot left iris and retina colomboma and frequent infections. Additionally the proband also presents with dysmorphic features including bulbous nasal tip with thickened nasal alae short palpebral fissures with telecanthus post…	Full or partial overlap with indication for testing	deletion	STAG2	X	123210227	123210230	c.2580_2582delGAG	Arg862del	Hemizygous	inframe_deletion	maternal	STAG2-related X-linked intellectual disability syndrome	X_LINKED	Variant of Uncertain Significance
00637	LMIC	Male	NEGATIVE	includes limb girdle muscular dystrophy with calf hypertrophy muscle atrophy of the thighs proximal muscle weakness of both upper and lower extremities and Gowers sign. The proband also presents with scoliosis areflexia elevated creatine kinase level and an abnormal EMG which shows signs of myopathy and slight denervation.
00640	LMIC	Male	See Below (Inconclusive)	early onset paraparesis spinal muscular atrophy muscle atrophy and weakness scoliosis areflexia elevated creatine kinase and chronic peripheral motor neuron lesions and fasciculations in proximal and distal muscles noted from EMG testing.	Incidental Finding	SNV	VWF	12	6143978	6143978	c.2561G>A	Arg854Gln	Heterozygous	missense_variant	paternal	von Willebrand Disease	RECESSIVE	Pathogenic
00640	LMIC	Male	See Below (Inconclusive)	early onset paraparesis spinal muscular atrophy muscle atrophy and weakness scoliosis areflexia elevated creatine kinase and chronic peripheral motor neuron lesions and fasciculations in proximal and distal muscles noted from EMG testing.	Incidental Finding	SNV	VWF	12	6128787	6128787	c.3797C>T	Pro1266Leu	Heterozygous	missense_variant	maternal	von Willebrand Disease	DOMINANT	Pathogenic
00675	HIC	Male	See Below (Inconclusive)	muscular dystrophy developmental delay autism spectrum disorder obesity and elevated creatine.	Full or partial overlap with indication for testing	copy_number_variation	DMD					50 Mb		50 Mb	pericentric inversion	Duchenne Muscular Dystrophy
00679	HIC	Male	See Below (Inconclusive)	muscular dystrophy autism spectrum disorder diastolic dysfunction developmental delay obesity and seizures.	Full or partial overlap with indication for testing	copy_number_variation		15	22833321	23223777	1	15q11.2	Heterozygous	390 kb	unknown (not detected in mother)	15q11.2 microdeletion syndrome	DOMINANT	Pathogenic
00704	HIC	Male	POSITIVE	intellectual disability and cognitive delay absent speech growth deficiency poor coordination and hypotonia which was particularly notable during infancy. Dysmorphic features include synophrys high nasal bridge columella below nostrils multiple labial frenuli bifid uvula mildly smooth philtrum and abnormal thenar creases. The proband also shows strabismus and has abnormally large central incisors.	Full or partial overlap with indication for testing	SNV	SATB2	2	200298089	200298089	c.318T>G	Tyr106Ter	Heterozygous	stop_gained	de novo	SATB2-associated syndrome	DOMINANT	Pathogenic
00578	HIC	Female	POSITIVE	focal epilepsy developmental delay speech delay hypertelorism bilateral metatarsus adductus and dysmorphic features including a broad high forehead and large mouth.	Full or partial overlap with indication for testing	insertion	WDR26	1	224612244	224612244	c.739dupA	Thr247AsnfsTer8	Heterozygous	frameshift_variant	de novo	WDR26-related intellectual disability	DOMINANT	Pathogenic
00569	HIC	Female	See Below (Inconclusive)	low birth weight ambiguous genitalia hypotonia chronic lung disease dysmorphic features hearing loss and skeletal abnormalities including campomelia of both index fingers likely rhizomelic limb shorterning turricephaly and hip joint instability.	Full or partial overlap with indication for testing	XX or XY complement differed from reported sex and/or ambiguous genitalia		X			1	X chromosome	Hemizygous			46, XY disorders of sex development
[truncated: 555 more rows]

## Sheet: cGS_Impact_Survey
										Did this patient have any of the following tests (check all that apply): (1=endorsed; 0=not endorsed)							Did the patient’s diagnosis/diagnoses change due to information obtained by WGS? (1=yes, 0=no, N/A=N/A)	In this patient, WGS (check all that apply): (1=endorsed; 0=not endorsed)											Did the WGS result prompt any of the following (check all that apply): (1=endorsed; 0=not endorsed)							Which statement(s) describe the impact of the WGS results on this patient’s management (select all that apply): (1=endorsed; 0=not endorsed)										Did the WGS result(s) contribute to decisions related to palliative or end of life care? (1=endorsed; 0=not endorsed)	Did WGS contribute to any of the following aspects of patient/family counseling (select all that apply): (1=endorsed; 0=not endorsed)
[truncated: 1,005 more rows]
[truncated: 10 more columns]
